# Supplementary material for: Low-dose naltrexone for the induction of remission in patients with mild to moderate Crohn’s disease: protocol for the randomised, double-blinded, placebo-controlled, multicentre LDN Crohn study
Source: PubMed Central journal article supplement — BMJ Open. 2022 Apr 8;12(4):e058358. doi: 10.1136/bmjopen-2021-058358 (PMC8996009; doi:10.1136/bmjopen-2021-058358), 2022-04-08
Supplement: bmjopen-2021-058358.draft_revisions.pdf [file bmjopen-2021-058358.draft_revisions.pdf]

# BMJ Open

BMJ Open is committed to open peer review. As part of this commitment we make the peer review history of every article we publish publicly available.

When an article is published we post the peer reviewers' comments and the authors' responses online. We also post the versions of the paper that were used during peer review. These are the versions that the peer review comments apply to.

The versions of the paper that follow are the versions that were submitted during the peer review process. They are not the versions of record or the final published versions. They should not be cited or distributed as the published version of this manuscript.

BMJ Open is an open access journal and the full, final, typeset and author-corrected version of record of the manuscript is available on our site with no access controls, subscription charges or pay-per-view fees (<http://bmjopen.bmj.com>).

If you have any questions on BMJ Open's open peer review process please email [info.bmjopen@bmj.com](mailto:info.bmjopen@bmj.com)

# BMJ Open

**Low Dose Naltrexone for the induction of remission in patients with mild to moderate Crohn's Disease: protocol for the randomized, double-blinded, placebo-controlled, multicentre LDN Crohn study.**

|                               |                                                                                                                                                                                                                                                                  |
|-------------------------------|------------------------------------------------------------------------------------------------------------------------------------------------------------------------------------------------------------------------------------------------------------------|
| Journal:                      | <i>BMJ Open</i>                                                                                                                                                                                                                                                  |
| Manuscript ID                 | bmjopen-2021-058358                                                                                                                                                                                                                                              |
| Article Type:                 | Protocol                                                                                                                                                                                                                                                         |
| Date Submitted by the Author: | 20-Oct-2021                                                                                                                                                                                                                                                      |
| Complete List of Authors:     | Paulides, Emma; Erasmus MC, Gastroenterology and Hepatology; Lie, Mitchell R.K.L.; Erasmus University Medical Center, Department of Gastroenterology & Hepatology<br>van der Woude, Christien Janneke; Erasmus MC, Department of Gastroenterology and Hepatology |
| Keywords:                     | Inflammatory bowel disease < GASTROENTEROLOGY, Adult gastroenterology < GASTROENTEROLOGY, Clinical trials < THERAPEUTICS                                                                                                                                         |
|                               |                                                                                                                                                                                                                                                                  |

SCHOLARONE™  
Manuscripts

1  
2 **Low Dose Naltrexone for the induction of remission in patients with mild to moderate Crohn's Disease:**  
3 **protocol for the randomized, double-blinded, placebo-controlled, multicentre LDN Crohn study.**  
4  
5  
6

7 Emma Paulides (MD)<sup>1</sup>, Mitchell R.K.L. Lie (MD, PhD)<sup>1</sup>, C. Janneke van der Woude (MD, PhD)<sup>1</sup>  
8

9 1. Department of Gastroenterology & Hepatology, Erasmus University Medical Center, Rotterdam,  
10 The Netherlands.  
11  
12

13  
14  
15 Short title: RCT with LDN for the induction of remission in CD.  
16

17 Word count: 2830  
18

19 Protocol version 4, June 2021  
20

21 Authors Contributions: CW conceived the idea for the study, designed the protocol and supervises study  
22 execution. ML designed the protocol and drafted the manuscript. EP designed the protocol, executes the  
23 study and drafted the manuscript. All authors provided critical revision of the manuscript for important  
24 intellectual content and approved the final draft of the protocol for submission.  
25  
26

27 Disclosures: Professor CJ van der Woude has served on advisory boards for Abbvie, Takeda, Pfizer and  
28 Celltrion. She is supported by research funding from ZonMW, Tramedico, and Pfizer.  
29

30 Funding: This work was supported by the Netherlands Organisation for Health Research and Development  
31 (ZonMw, Good use of medication, grant number 848082001). ZonMw is part of the Netherlands  
32 Organisation for Scientific Research (NWO).  
33  
34

35 Corresponding author:  
36

37 C.J. van der Woude, MD, PhD  
38 Erasmus University Medical Center  
39 Doctor Molewaterplein 40  
40 3015 GD Rotterdam, The Netherlands  
41 Email: [c.vanderwoude@erasmusmc.nl](mailto:c.vanderwoude@erasmusmc.nl)  
42  
43  
44  
45  
46  
47  
48  
49  
50  
51  
52  
53  
54  
55  
56  
57  
58  
59  
60

## ABSTRACT

**Introduction:** Crohn's disease (CD) is an inflammatory bowel disease (IBD). Several drugs exist to induce and maintain remission, but a significant part of the patients is refractory to current IBD drugs or experiences side effects. Whether low dose naltrexone (LDN) is a safe and easily accessible alternative treatment option for these patients needs to be investigated. The aim of this study is to assess the efficacy of LDN for the induction of remission in patients with mild to moderate CD.

**Methods and analysis:** The LDN Crohn study is a randomized, double-blinded, placebo-controlled multicentre trial. Patients with CD are randomized 1:1 to receive treatment with either LDN 4.5 mg once daily or placebo for 12 weeks. The primary objective is endoscopic remission at week 12, defined as SES-CD  $\leq 2$  and ulcerated surface subscore  $\leq 1$  in all five segments. Secondary aims include clinical and endoscopic response, changes in laboratory measures of inflammation, adverse events and patient-reported outcomes. To have 85% power to detect a true difference in the primary outcome measure between placebo and LDN, 61 patients will be needed in both groups.

**Ethics and dissemination:** The study is approved by the Medical Ethics Committee of the Erasmus MC, Rotterdam, the Netherlands (registration number NL69149.078.19, MEC-2019-0602). Results will be published in peer-reviewed journals and presented at international conferences.

**Trial registration numbers:** EudraCT registry (2019-000852-32); Dutch trial registry (NL9259).

### Strengths and limitations of this study

- The LDN Crohn study is the first randomized, double-blinded, placebo-controlled multicentre study that investigates the efficacy of low dose naltrexone for the induction of remission of mild to moderate Crohn's disease in adults.
- The results of this study will help to decide whether LDN might be an alternative option for inducing remission in patients with mild to moderate Crohn's disease.
- LDN is cheap and has a low adverse events profile.
- The National Crohn and colitis patient's organisation is involved and patient-reported outcomes are included.
- The mechanism of action and long-term safety aspects of LDN in patients with mild to moderate Crohn's disease are not yet fully understood.

## INTRODUCTION

Crohn's disease (CD) is a chronic, progressive, inflammatory disease of the gastrointestinal tract. Treatment strategies aim to induce sustained remission, by controlling inflammation and preventing complications of the disease. The last decade, an increasing number of new drugs with different mechanisms of action have been introduced to induce and/or maintain remission in CD. Although the currently available therapies are effective in many patients, all therapies have their individual safety concerns.(1) Immunosuppressive drugs or combination therapy with biologicals might induce bone marrow suppression, liver test abnormalities, malignancies and do have immunogenic risks.(2) Further, the introduction of biologicals resulted in increased drug and societal costs.(3) The lifelong nature of CD increases the probability that patients have cycled through various therapies, leaving few approved options. Thus, alternative treatments that are less expensive and have a favourable side effect profile remain of continued interest.

A relatively unknown area of interest in the therapy of inflammatory bowel diseases (IBD) is the role of the opioid system. Available evidence suggests that the endogenous opioid system is involved in gastrointestinal inflammation.(4, 5) Animal and human studies showed that the  $\mu$ -opioid receptor (MOR) was upregulated in subjects with IBD. In addition, they demonstrated that MOR agonists can decrease inflammation through regulation of pro inflammatory cytokine release and T-cell proliferation.(6, 7) This led to the idea of new therapeutic options for the treatment of IBD by the development of selective MOR agonists. A familiar MOR agonist is naltrexone: an orally administered narcotic antagonist that is approved for the treatment of alcohol dependence by the European Medicines Agency (EMA) and Food and Drug Administration (FDA).(8) When administered at high concentrations, for example 50 mg, this drug acts as an antagonist by blocking the endogenous opioid effects. However, administered in lower doses such as 4.5 mg, it is assumed that this lower naltrexone dose results in upregulation of endogenous enkephalin and endorphin levels and has a positive modulatory effect on the MOR, thereby controlling gut inflammation.(9, 10) Thus, the use of so called low dose naltrexone (LDN) in the clinical settings has gained interest in IBD.

At the Erasmus MC, a pilot study was performed to evaluate the effect of LDN on the clinical, biochemical and cellular level in patients with IBD. In this study, patients not in remission and not responding to conventional therapy were offered to initiate LDN as a concomitant treatment. LDN induced clinical improvement in 74.5%, and clinical remission in 25.5% of the patients at week 12. A minority of the patients experienced side effects, but these were relatively mild and consisted of vivid dreams, drowsiness, and headache. LDN therapy resulted in reduced endoplasmic reticulum stress in biopsies from inflamed mucosa, and led to improved wound healing in *in vitro* models.(11) To objectively define the effect of LDN on intestinal inflammation, a randomized controlled trial with endoscopic assessment is necessary. Only via an objective assessment we can elucidate the exact role of LDN in the treatment of patients with CD.

Therefore, the aim of this study is to prospectively assess the efficacy of LDN as induction therapy in patients with active CD.

## METHODS

This protocol includes the standard protocol items recommended for interventional trials according to the Standard Protocol Items: Recommendations for Interventional Trials (SPIRIT) guidelines.<sup>(12)</sup> The most recent study protocol (Protocol version 4, June 2021) is presented in this manuscript. The date of the first enrolment was 14 January 2021.

### Study setting

This randomized, double-blinded, placebo-controlled multicentre trial is currently being performed at the departments of Gastroenterology and Hepatology in the Netherlands, including both academic and non-academic centers. Patients with active CD are randomized 1:1 to receive treatment with either LDN 4.5 mg once daily or placebo, for 12 weeks. After 12 weeks patients are invited to participate in an open label exploratory extension study until week 52. Adult patients with mild to moderately active CD, defined by endoscopy with mucosal ulcers in the ileum and/or colon and a Simple Endoscopic Score-CD (SES-CD) of 3-15, who visit the outpatient clinic of the department of Gastroenterology and Hepatology of participating hospitals are eligible.<sup>(13)</sup> Clinical visits are planned at week 0, 4, 12 and if applicable week 24 and 52. Telephone consults are scheduled at week 2, 8 and if applicable week 36. See Figure 1 for the flowchart of the study design. Prior to enrolment, all patients must sign informed consent (Appendix 1).

## PARTICIPANTS

### Eligibility criteria

Patients with mild to moderately active CD, defined by endoscopy with mucosal ulcers in the ileum or colon or both, and SES-CD of 3-15, aged 18 years or older who visit the outpatient clinic of the department of Gastroenterology and Hepatology of participating hospitals are eligible. Endoscopic assessment up to 2 months prior to the start of the study is mandatory. Permitted concomitant CD therapies are: aminosalicylates, azathioprine, 6-mercaptopurine, thioguanine and methotrexate provided the dose prescribed has been stable for at least 4 weeks prior to randomization; dose must be stable for the first 10 weeks after randomization. Oral corticosteroid therapy (prednisone prescribed at a stable dose  $\leq 30$  mg/day or budesonide prescribed at a stable dose of  $\leq 9$  mg/day) must have been stable for 2 weeks prior to randomization, and tapering during the study is mandatory. The use of other investigational products, biologicals, JAK-STAT inhibitors, cyclosporine, thalidomide and tacrolimus is prohibited, and these medicines need to be stopped 12 weeks prior to the start of the study. Other exclusion criteria are opioid use, drugs and/or alcohol abuse, pregnancy or lactation, stool positive for an infectious agent, and other significant medical conditions that might interfere with the study (such as a stricture causing symptoms or fistulising disease complicated by infection).

## INTERVENTIONS

### Investigational product

In this study, the participant will be given naltrexone 4.5 mg or placebo once a day. Placebo and LDN capsules are identical in appearance. The active substance in the investigational medicinal product is naltrexone hydrochloride. Naltrexone is a derivative of noroxymorphone that is the N-cyclopropylmethyl congener of naloxone. It is a narcotic antagonist that is effective orally, and longer lasting and more potent than naloxone. Naltrexone (50 mg) was approved for the treatment of alcohol dependence in June 2010 by the EMA and FDA. EU-procedure number: NL/H/1151/001/DC Registration number in the Netherlands: RVG 102900.

## Patient reported outcomes

During every scheduled consult, patients are asked to fill out questionnaires online, see Table 1. This includes the Patient Reported Outcome-2 (PRO2)(14) and the Harvey Bradshaw Index (HBI)(15) for disease activity, the short Inflammatory Bowel Disease Questionnaire (SIBDQ)(16) and the 5-level EuroQol Five Dimensions Health Questionnaire (EQ5D-5L)(17) for quality of life, the Work Productivity and Activity Impairment Questionnaire (WPAI)(18) for work productivity, fatigue via The Functional Assessment of Chronic Illness Therapy – Fatigue (FACIT-F)(19) and Multidimensional Fatigue Inventory (MFI)(20) and sleep, anxiety and depression via the Patient-Reported Outcomes Measurement Information System (NIH PROMIS)(21).

## Endoscopic assessment

A colonoscopy will be performed during screening (maximum of 8 weeks before the start of the study) and at the end of the induction phase at week 12. If patients are willing to participate in the open label follow-up study, an extra colonoscopy can be performed at week 52, see Figure 1. Colonoscopy allows for direct mucosal visualisation and the performance of biopsies. By using the SES-CD, activity, and severity of CD before and after treatment can be determined.

## Serum and stool samples

Baseline blood and stool samples will be obtained from all participants, with a maximum of 8 weeks before the start of the therapy. During the study, blood will be checked at week 4 and 12 and every 3 months during the maintenance phase if applicable, see Table 1. Faecal calprotectin (FC) will be collected at week 12, and if applicable at week 24 and 52. This granulocyte-derived protein is measured in the stool and is a non-invasive, cheap and extensively studied biomarker that correlates with clinical and endoscopic disease activity.(22)

## Disease worsening criteria

Patients that show an increase in HBI at 2 consecutive visits can be discontinued from blinded treatment and can be offered the option to receive open-label therapy. If a subject experiences significant worsening of underlying CD, which requires any of the prohibited medications or surgical intervention at any point during the study, treatment discontinuation should be considered at investigator's discretion.

## OUTCOMES

See Table 1 for the schedule of study procedures and interventions.

### Primary outcome

The aim of this study is to prospectively assess the efficacy of LDN for the induction of remission in patients with mild to moderate active CD. The primary objective is endoscopic remission at week 12, defined as SES-CD  $\leq 2$  and an ulcerated surface subscore  $\leq 1$  in all five segments.(13)

### Secondary outcomes

#### *Disease activity*

- The proportion of patients in steroid free clinical remission defined as a HBI score of  $\leq 4$  and complete tapering of systemic corticosteroids and endoscopic remission at week 12.

- Response defined by a decrease in HBI of  $\geq 3$  points compared to baseline and endoscopic response defined as a reduction of SES-CD score by  $\geq 50\%$  versus baseline at week 12.
- Changes in laboratory measures of inflammation (CRP and FC) from baseline at week 12, 24 and 52.
- Proportion of patients in corticosteroid free clinical remission at week 52.
- Endoscopic remission and response at week 52.
- Response via the HBI and PRO2.

#### Quality of life

- Quality of life, via the SIBDQ and EQ5D.
- Fatigue, via the FACIT-F and MFI.
- Anxiety, depression and sleep disturbance, via the PROMIS NIH.

#### Healthcare costs and work

- Work productivity via the WPAI.
- Healthcare costs will be calculated and the EQ-5D utility will be used to derive a quality-adjusted life year (QALY) estimate.

#### Sample size

A power analysis was performed on the primary outcome of achieving endoscopic remission. Based on previous research, it was estimated that the mucosal healing rates at week 12 would be 25% for LDN and 5% for placebo, and the dropout rate 5%. To have 85% power to detect a true difference in the primary outcome measure between placebo and LDN, 61 patients will be needed in both groups. In total, we plan to recruit 122 patients to include into the study. All statistical analyses will be performed using 2-sided tests with  $\alpha = 0.05$ .

#### ASSIGNMENT OF INTERVENTIONS

Eligible patients will be randomized to one of two groups (LDN or placebo) in a 1:1 ratio. The pharmacy that produced the trial medication numbered the bottles with unique package numbers, according to a randomization schedule that was generated by a statistician. The trial medication is being stored at the pharmacy of the Erasmus MC and will be sent directly to the participant after inclusion. Patient, doctor and investigator are blinded, and if unblinding is necessary, a pharmacist from the Erasmus MC pharmacy will be asked to provide the information required.

#### DATA MANAGEMENT AND ANALYSIS

Data of all participating centres will be collected and entered both by participants and staff in electronic case report forms of Gemstracker, an electronic database set up for clinical trials.(23) Data will be coded, stored and monitored by certified personnel following good clinical practice guidelines. Adverse events will be registered at every visit and in case of a serious adverse event reported to the METC of the Erasmus MC.

#### Statistical methods

Demographic and patient data will be described using frequencies and percentages for categorical variables. Continuous variables will be described using mean and standard deviation, or median and interquartile range for non-normally distributed variables. Categorical variables will be compared between groups using Chi-squared test and continuous variables using the t-test or Mann-Whitney U test for non-normally distributed variables. A p-value of  $<0.05$  will be considered statistically significant



1  
2 The primary outcome endoscopic remission at week 12, will be compared between the LDN and placebo  
3 group using a chi-square test. The difference between the steroid free clinical remission between the LDN  
4 and placebo group, defined by a HBI score of  $\leq 4$  and complete tapering of systemic corticosteroids and  
5 endoscopic remission at week 12, will be measured using a chi-square test. Response, defined by a  
6 decrease in HBI of  $\geq 3$  points compared to baseline and endoscopic response defined as a reduction of SES-  
7 CD score by  $\geq 50\%$  at week 12 compared to baseline, will be analysed using a chi-square test. Proportion of  
8 patients in corticosteroid free clinical remission and endoscopic remission at week 52 will be analysed using  
9 a chi-square test as well. Changes in laboratory measures of inflammation (CRP and FC) within each group  
10 will be analysed using a paired T-test. The evolution of different patient reported outcomes over time will  
11 be analysed using mixed models.  
12  
13  
14

## 15 **ETHICS AND DISSEMINATION**

16  
17 This study is approved by the METC of the Erasmus MC, Rotterdam, the Netherlands (registration number  
18 NL69149.078.19, MEC-2019-0602) on 31 January 2020. Important protocol modifications are assessed and  
19 approved by the METC, and reported to participating investigators. The LDN Crohn study has been  
20 registered at the Dutch trial registry (NL9259). Results will be published in peer-reviewed journals and  
21 presented at international conferences.  
22  
23  
24

## 25 **PATIENT AND PUBLIC INVOLVEMENT STATEMENT**

26  
27 This study was designed in collaboration with a patient with IBD and with the Dutch Crohn's and Colitis  
28 patient organization.<sup>(24)</sup> We will engage closely with the patient organisation to communicate research  
29 findings to inform patients on the effectiveness of LDN on controlling inflammation. Patient reported  
30 outcomes are included in our study to measure the impact of the intervention on the patient's life.  
31  
32  
33  
34  
35  
36  
37  
38  
39  
40  
41  
42  
43  
44  
45  
46  
47  
48  
49  
50  
51  
52  
53  
54  
55  
56  
57  
58  
59  
60

## DISCUSSION

In this double-blinded and placebo-controlled study, the effectiveness of LDN for the induction of remission of patients with mild to moderate CD is being investigated. The benefits of this therapy will be the anti-inflammatory effects, the low frequency and mild side-effects, the oral administration route, and low costs. Thereby, this study will have direct impact on the management of CD patients by determining if LDN is useful in the treatment of mild to moderate CD. If LDN is capable of inducing remission, this drug might be implemented in the treatment strategies for patients with CD.

In addition to the preliminary study of the Erasmus MC, several pilot studies have been executed that investigated the effect of LDN therapy in active IBD. An open-label pilot study in 17 patients showed a clinical response in 89% and clinical remission in 67% of the participants after 12 weeks of LDN therapy. Sleep disturbance was the most common side effect, occurring in seven patients.(25) The same research group conducted a subsequent randomized, placebo-controlled, double blind study in 34 IBD patients, and found a response rate of 88% in the LDN group versus 40% in the placebo group after 12 weeks of therapy. In addition, 33% of the participants achieved endoscopic remission in the LDN group vs 8% in placebo group.(26) Furthermore, LDN appeared safe and was well tolerated when investigated in a pilot RCT with 12 paediatric IBD patients. They showed a significant reduction in PCDAI scores after 8 weeks, with 25% of patients achieving clinical remission and 67% showing clinical improvement in the LDN group.(27) The authors from The Cochrane Database concluded in their review that there is currently insufficient evidence to allow any firm conclusions regarding the efficacy and safety of LDN, and further randomized controlled trials are required.(28)

A quasi-experimental before-and-after study from Norway investigated whether initiation of LDN therapy by IBD patients resulted in changes in the use of concomitant IBD medication. The investigators identified 582 IBD patients that had at least one LDN prescription recorded in the Norwegian Prescription Database in 2013. Among the 256 patients that became persistent LDN users, there were reductions in number of users of various examined medicines. In addition, the reductions in number of users were larger in persistent LDN users compared to less frequent users for different IBD drugs. This may suggest that LDN use is associated with the use of less concurrent IBD medication in this group of patients, leading to a reduction in costs and in a lowered risk of adverse events.(29)

A strength of this study is the double-blinded and placebo-controlled design, that provides the strongest possible evidence of causation. Further, the primary outcome defined by mucosal healing, assessed by a colonoscopy before and after induction therapy, is the gold standard for evaluating disease activity. In addition, biochemical measures and self-reported disease activity are assessed to follow-up response and relapse over time. There are no evident limitations in the design of the trial, but the anti-inflammatory mechanism of action of LDN is not yet fully understood.

The efficacy signals demonstrated in the (pilot) clinical trials, as well as the beneficial findings in nonclinical models of disease and the overall safety and tolerability of LDN that have been elucidated to date, result in a favourable benefit-risk profile for this agent in continued investigation as a treatment for CD. Therefore, this randomized, double-blinded, placebo-controlled multicentre trial will provide important insights into the anti-inflammatory effects of LDN in patients with mild to moderate active CD. If LDN is able to induce remission, this drug might be regarded as a first line therapy in the treatment of active CD because of the oral administration, affordability and anticipated low frequency of side effects.

## AUTHORS' CONTRIBUTIONS

CW conceived the idea for the study, designed the protocol and supervises study execution. ML designed the protocol and drafted the manuscript. EP designed the protocol, executes the study and drafted the manuscript. All authors provided critical revision of the manuscript for important intellectual content and approved the final draft of the protocol for submission.

## ACKNOWLEDGEMENT

We thank Dr. A.C. de Vries, Dr. R.L. West, Drs. S. Nikkessen, T. Markus, Dr. E. Ista for their help in designing the study. We want to thank prof. dr. E.W. Steyerberg for the statistical support.

## FUNDING SOURCES

The investigator initiated LDN Crohn study is supported by the Netherlands Organisation for Health Research and Development (ZonMw, Good use of medication, grant number 848082001). ZonMw is part of the Netherlands Organisation for Scientific Research (NWO).

## COMPETING INTEREST

Professor CJ van der Woude has served on advisory boards for Abbvie, Takeda, Pfizer and Celltrion. She is supported by research funding from ZonMW, Tramedico, and Pfizer.

## PATIENT AND PUBLIC INVOLVEMENT

Patients and the patient organisation were involved in the design of this research. Refer to the Methods section for further details.

## PATIENT CONSENT FOR PUBLICATION

Not required.

## DATA AVAILABILITY STATEMENT

The dataset generated during the LDN Crohn study is available on reasonable request.

## REFERENCES

1. Torres J, Mehandru S, Colombel JF, Peyrin-Biroulet L. Crohn's disease. *Lancet*. 2017;389(10080):1741-55.
2. Torres J, Bonovas S, Doherty G, Kucharzik T, Gisbert JP, Raine T, et al. ECCO Guidelines on Therapeutics in Crohn's Disease: Medical Treatment. *J Crohns Colitis*. 2020;14(1):4-22.
3. van Linschoten RCA, Visser E, Niehot CD, van der Woude CJ, Hazelzet JA, van Noord D, et al. Systematic review: societal cost of illness of inflammatory bowel disease is increasing due to biologics and varies between continents. *Aliment Pharmacol Ther*. 2021;54(3):234-48.
4. Mani AR, Moore KP. New insights into the role of endogenous opioids in the pathogenesis of gastrointestinal and liver disease. *Gut*. 2009;58(7):893-5.
5. Sobczak M, Sałaga M, Storr MA, Fichna J. Physiology, signaling, and pharmacology of opioid receptors and their ligands in the gastrointestinal tract: current concepts and future perspectives. *J Gastroenterol*. 2014;49(1):24-45.
6. Philippe D, Chakass D, Thuru X, Zerbib P, Tsicopoulos A, Geboes K, et al. Mu opioid receptor expression is increased in inflammatory bowel diseases: implications for homeostatic intestinal inflammation. *Gut*. 2006;55(6):815-23.
7. Philippe D, Dubuquoy L, Groux H, Brun V, Chuoï-Mariot MT, Gaveriaux-Ruff C, et al. Anti-inflammatory properties of the mu opioid receptor support its use in the treatment of colon inflammation. *J Clin Invest*. 2003;111(9):1329-38.
8. Agency EM. Guideline on the development of medicinal products for the treatment of alcohol dependence: European Medicines Agency; [updated 18 February 2010. Available from: [https://www.ema.europa.eu/en/documents/scientific-guideline/guideline-development-medicinal-products-treatment-alcohol-dependence\\_en.pdf](https://www.ema.europa.eu/en/documents/scientific-guideline/guideline-development-medicinal-products-treatment-alcohol-dependence_en.pdf).
9. Matters GL, Harms JF, McGovern C, Fitzpatrick L, Parikh A, Nilo N, et al. The opioid antagonist naltrexone improves murine inflammatory bowel disease. *J Immunotoxicol*. 2008;5(2):179-87.
10. Tawfik DI, Osman AS, Tolba HM, Khatlab A, Abdel-Salam LO, Kamel MM. Evaluation of therapeutic effect of low dose naltrexone in experimentally-induced Crohn's disease in rats. *Neuropeptides*. 2016;59:39-45.
11. Lie M, van der Giessen J, Fuhler GM, de Lima A, Peppelenbosch MP, van der Ent C, et al. Low dose Naltrexone for induction of remission in inflammatory bowel disease patients. *J Transl Med*. 2018;16(1):55.
12. SPIRIT 2013 Statement: Defining Standard Protocol Items for Clinical Trials. *Annals of Internal Medicine*. 2013;158(3):200-7.
13. Daperno M, D'Haens G, Van Assche G, Baert F, Bulois P, Maunoury V, et al. Development and validation of a new, simplified endoscopic activity score for Crohn's disease: the SES-CD. *Gastrointest Endosc*. 2004;60(4):505-12.
14. Bojic D, Bodger K, Travis S. Patient Reported Outcome Measures (PROMs) in Inflammatory Bowel Disease: New Data. *J Crohns Colitis*. 2017;11(suppl\_2):S576-S85.
15. Harvey RF, Bradshaw JM. A simple index of Crohn's-disease activity. *Lancet*. 1980;1(8167):514.
16. Irvine EJ, Zhou Q, Thompson AK. The Short Inflammatory Bowel Disease Questionnaire: a quality of life instrument for community physicians managing inflammatory bowel disease. CCRPT Investigators. Canadian Crohn's Relapse Prevention Trial. *Am J Gastroenterol*. 1996;91(8):1571-8.
17. EuroQol G. EuroQol--a new facility for the measurement of health-related quality of life. *Health Policy*. 1990;16(3):199-208.
18. Reilly MC, Zbrozek AS, Dukes EM. The validity and reproducibility of a work productivity and activity impairment instrument. *Pharmacoeconomics*. 1993;4(5):353-65.
19. Yellen SB, Cella DF, Webster K, Blendowski C, Kaplan E. Measuring fatigue and other anemia-related symptoms with the Functional Assessment of Cancer Therapy (FACT) measurement system. *J Pain Symptom Manage*. 1997;13(2):63-74.
20. Smets EM, Garssen B, Bonke B, De Haes JC. The Multidimensional Fatigue Inventory (MFI) psychometric qualities of an instrument to assess fatigue. *J Psychosom Res*. 1995;39(3):315-25.

- 1  
2 21. Terwee CB, Roorda LD, de Vet HC, Dekker J, Westhovens R, van Leeuwen J, et al. Dutch-Flemish  
3 translation of 17 item banks from the patient-reported outcomes measurement information system  
4 (PROMIS). *Qual Life Res.* 2014;23(6):1733-41.
- 5 22. Turner D, Ricciuto A, Lewis A, D'Amico F, Dhaliwal J, Griffiths AM, et al. STRIDE-II: An Update on the  
6 Selecting Therapeutic Targets in Inflammatory Bowel Disease (STRIDE) Initiative of the International  
7 Organization for the Study of IBD (IOIBD): Determining Therapeutic Goals for Treat-to-Target strategies in  
8 IBD. *Gastroenterology.* 2021;160(5):1570-83.
- 9 23. GEneric Medical Survey Tracker [updated 03 December 2020. Available from:  
10 <https://gemstracker.org/wiki/doku.php?id=start>.
- 11 24. Crohn-colitis: Crohn & Colitis NL; [Available from: <https://www.crohn-colitis.nl/>.
- 12 25. Smith JP, Stock H, Bingaman S, Mauger D, Rogosnitzky M, Zagon IS. Low-dose naltrexone therapy  
13 improves active Crohn's disease. *Am J Gastroenterol.* 2007;102(4):820-8.
- 14 26. Smith JP, Bingaman SI, Ruggiero F, Mauger DT, Mukherjee A, McGovern CO, et al. Therapy with the  
15 opioid antagonist naltrexone promotes mucosal healing in active Crohn's disease: a randomized placebo-  
16 controlled trial. *Dig Dis Sci.* 2011;56(7):2088-97.
- 17 27. Smith JP, Field D, Bingaman SI, Evans R, Mauger DT. Safety and tolerability of low-dose naltrexone  
18 therapy in children with moderate to severe Crohn's disease: a pilot study. *J Clin Gastroenterol.*  
19 2013;47(4):339-45.
- 20 28. Parker CE, Nguyen TM, Segal D, MacDonald JK, Chande N. Low dose naltrexone for induction of  
21 remission in Crohn's disease. *Cochrane Database Syst Rev.* 2018;4(4):CD010410.
- 22 29. Raknes G, Simonsen P, Småbrekke L. The Effect of Low-Dose Naltrexone on Medication in  
23 Inflammatory Bowel Disease: A Quasi Experimental Before-and-After Prescription Database Study. *J Crohns*  
24 *Colitis.* 2018;12(6):677-86.
- 25  
26  
27  
28  
29  
30  
31  
32  
33  
34  
35  
36  
37  
38  
39  
40  
41  
42  
43  
44  
45  
46  
47  
48  
49  
50  
51  
52  
53  
54  
55  
56  
57  
58  
59  
60

1  
2 Figure legends  
3

4 Figure 1. Flowchart of the study design, with endoscopy as primary outcome at week 12. FC: fecal  
5 calprotectine, LDN: low dose naltrexone, T: telephone consult, C: clinical consults, W: week .  
6  
7  
8  
9  
10  
11  
12  
13  
14  
15  
16  
17  
18  
19  
20  
21  
22  
23  
24  
25  
26  
27  
28  
29  
30  
31  
32  
33  
34  
35  
36  
37  
38  
39  
40  
41  
42  
43  
44  
45  
46  
47  
48  
49  
50  
51  
52  
53  
54  
55  
56  
57  
58  
59  
60

For peer review only

Table 1. Schedule of study procedures, interventions and assessments.

|                                                 | Screening | Induction phase |        |         |         |         | Maintenance phase |         |         |
|-------------------------------------------------|-----------|-----------------|--------|---------|---------|---------|-------------------|---------|---------|
| Procedures                                      |           | Week 0          | Week 2 | Week 4* | Week 8* | Week 12 | Week 24           | Week 36 | Week 52 |
| Clinical visit                                  | (X)       | X               |        | X       |         | X       | X                 |         | X       |
| Telephone consult                               | (X)       |                 | X      |         | X       |         |                   | X       |         |
| Eligibility screening                           | X         |                 |        |         |         |         |                   |         |         |
| Informed consent                                | X         |                 |        |         |         |         |                   |         |         |
| Colonoscopy                                     | X         |                 |        |         |         | X       |                   |         | (X)     |
| Laboratory tests*                               | X         |                 |        | X       |         | X       | X                 |         | X       |
| Feecal calprotectin                             | X         |                 |        |         |         | X       | X                 |         | X       |
| Baseline information                            |           | X               |        |         |         |         |                   |         |         |
| Concomitant medication                          |           | X               | X      | X       | X       | X       | X                 | X       | X       |
| HBI, PRO2                                       |           | X               | X      | X       | X       | X       | X                 | X       | X       |
| SIBDQ, EQ-5D-5L, FACIT-F, MFI, NIH-PROMIS, WPAI |           | X               |        | X       |         | X       | X                 |         | X       |
| Adverse events                                  |           |                 | X      | X       | X       | X       | X                 | X       | X       |

(X): optional, HBI: Harvey Bradshaw Index, PRO2: Patient Reported Outcome-2 (PRO2), SIBDQ: short Inflammatory Bowel Disease Questionnaire. EQ5D-5L: 5-level EuroQol Five Dimensions Health Questionnaire, FACIT-F: Functional Assessment of Chronic Illness Therapy – Fatigue (FACIT-F), MFI: Multidimensional Fatigue Inventory, NIH PROMIS: sleep, anxiety and depression via the Patient-Reported Outcomes Measurement Information System, WPAI: Work Productivity and Activity Impairment Questionnaire.

\*Laboratory test include: urea, creatinine, CRP, aspartate transaminase, alanine transaminase, lactate dehydrogenase, alkaline phosphatase, haemoglobin, mean corpuscular volume, thrombocytes, leukocytes.

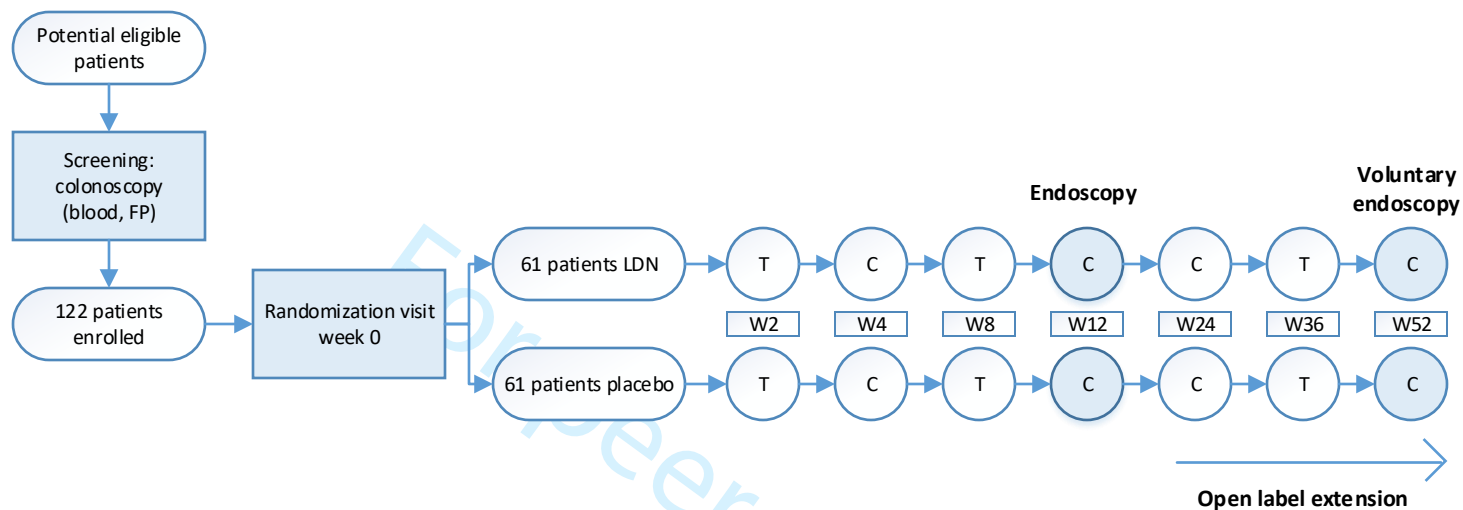



# Proefpersoneninformatie voor deelname aan medisch-wetenschappelijk onderzoek

## Naltrexon in lage dosering voor het in remissie brengen van de ziekte van Crohn

Officiële titel: Lage dosering Naltrexon voor inductie van remissie bij patiënten met een milde tot matige vorm van de ziekte van Crohn, waarbij de standaardtherapie onvoldoende werkt of teveel bijwerkingen geeft.

### Inleiding

Geachte heer/mevrouw,

Wij vragen u vriendelijk om mee te doen aan een medisch-wetenschappelijk onderzoek. Meedoen is vrijwillig. Om deel te nemen aan het onderzoek is wel uw schriftelijke toestemming nodig. U ontvangt deze brief omdat u de ziekte van Crohn heeft waarbij u onvoldoende effect ondervindt van uw huidige medicijnen of teveel last heeft van bijwerkingen. Voordat u beslist of u wil meedoen aan dit onderzoek, krijgt u uitleg over wat het onderzoek inhoudt. Lees deze informatie rustig door en vraag de onderzoeker uitleg als u vragen heeft. U kunt ook de onafhankelijk deskundige, die aan het eind van deze brief genoemd wordt, om aanvullende informatie vragen. Zie bijlage A voor contactgegevens. U kunt er ook over praten met uw partner, vrienden of familie. Verdere informatie over meedoen aan zo'n onderzoek staat in de bijgevoegde brochure 'Medisch-wetenschappelijk onderzoek'.

### 1. Algemene informatie

Dit onderzoek is opgezet door de afdeling Maag-, Darm- en Leverziekten van het Erasmus Medisch Centrum en wordt gedaan door artsen in meer dan 10 verschillende ziekenhuizen. Voor dit onderzoek zijn in totaal ruim 122 deelnemers nodig. De medisch-ethische toetsingscommissie van het Erasmus Medisch Centrum heeft dit onderzoek goedgekeurd. Algemene informatie over de toetsing van onderzoek vindt u in de brochure 'Medisch-wetenschappelijk onderzoek'.

### 2. Doel van het onderzoek

Het doel van het onderzoek is uitzoeken of een lage dosis naltrexon (LDN) de ziekte van Crohn in remissie kan brengen wanneer de huidige behandeling onvoldoende effect heeft of teveel bijwerkingen geeft. Tevens kijken we of het middel effect heeft op moeheid en stemming. Het is de bedoeling om de gevonden resultaten te publiceren.

### 3. Achtergrond van het onderzoek

De ziekte van Crohn behoort samen met colitis ulcerosa tot de groep Inflammatoire darmziekten (IBD). Deze ontstekingsziekten van de darm gaan gepaard met afwisselend rustige en actieve ziekteperiodes. De behandeling bestaat onder andere uit medicatie om de symptomen te verminderen en de ontsteking tot rust te brengen. De huidige behandeling van een patiënt met een milde ziekte van Crohn (CD) start in het algemeen met corticosteroïden. Hierna worden vaak als onderhoudsmedicatie immunosuppressiva gegeven, meestal thiopurines. Bij een groot deel van de patiënten is de ziekte met deze medicijnen goed onder controle. Echter bij een gedeelte van de patiënten is een vervolg stap naar biologische medicatie nodig.

Uit enkele kleine onderzoeken komt naar voren dat het medicijn Naltrexon (LDN), in lage doseringen, mogelijk ook gebruikt kan worden om de ziekte rustig te houden. Naltrexon heeft een gunstiger bijwerkingen profiel dan de biologische medicatie. Deze studie vergelijkt de werking van Naltrexon in lage dosering met een placebo, voor het in remissie brengen van de ziekte van Crohn. Tevens wordt er gekeken of Naltrexon effect heeft op moeheid en stemming. Het onderzoek wordt uitgevoerd in meer dan 10 ziekenhuizen in Nederland.

### 4. Wat meedoen inhoudt

Als u meedoet duurt dat 3 maanden. Indien u hierna door wil gaan met het onderzoek om te kijken of Naltrexon ook werkt als onderhoudsmiddel duurt het tot maximaal een jaar.

#### Geschiktheidsonderzoek

Eerst bepalen we of u mee kunt doen aan het onderzoek. Uw behandelend arts meet de ziekteactiviteit van uw darmziekte door te vragen naar uw klachten en een onderzoek in de ontlasting te doen. Tevens bekijkt hij de darm vanbinnen door middel van een coloscopie. Ook vragen we naar uw medische voorgeschiedenis en medicijngebruik.

#### Opzet van het onderzoek

Om het effect van lage dosering Naltrexon optimaal te onderzoeken wordt het vergeleken met het gebruik van een niet werkzaam middel, ook wel placebo. U wordt gerandomiseerd voor één van beide middelen, wat inhoudt dat het door loting wordt bepaald welk middel u gaat gebruiken. U en de onderzoekers weten tijdens het onderzoek niet welk middel u gebruikt.

#### Bezoeken en metingen

Voor het onderzoek is het nodig dat u meerdere keren naar het ziekenhuis komt, namelijk 2 keer op (ongeveer) de volgende momenten: week 4 en 12. Indien u ervoor kiest ook in week 24 en 52.

Tijdens de ziekenhuisbezoeken zal het volgende gebeuren:

- Bloedafname – elk poliklinisch bezoek, hierin meten we de bloedcellen en ontstekingswaarden

## Proefpersoneninformatie

- Inleveren ontlasting– poliklinisch bezoek week 12, hierin meten we ontstekingswaarden
- Vragenlijsten invullen – poliklinisch bezoek, hierbij krijgt u vragen over uw klachten en kwaliteit van leven. Het invullen kost ongeveer 20 minuten.
- Coloscopie – dit gebeurt voorafgaand aan de studie, in week 12 en indien u ervoor kiest in week 52.

Tijdens 2 telefonische afspraken vragen wij of u last heeft van bijwerkingen en nemen we een korte vragenlijst af om de ziekte activiteit te scoren. Dit duurt 10 min.

**Anders dan bij gebruikelijke zorg**

Normaal komt u misschien één keer in de 3 of 6 maanden bij uw arts voor controle van uw Crohn. De bezoeken die bij dit onderzoek horen, komen in plaats van normale bezoeken. Vanzelfsprekend geeft u het zelf aan wanneer het niet goed met u gaat, zodat een extra afspraak gepland zal worden.

In bijlage B vindt u alle informatie die u nodig heeft over de onderzoeksbehandeling en de procedures van het onderzoek.

**5. Wat wordt er van u verwacht**

Om het onderzoek goed te laten verlopen en voor uw eigen veiligheid, is het belangrijk dat u zich aan de volgende afspraken houdt. Naast de hieronder genoemde, kunnen er nog andere regels zijn die uw onderzoekarts met u zal doornemen;

De afspraken zijn dat u:

- De medicijnen inneemt.
- Afspraken voor bezoeken nakomt;
- Niet ook nog aan een ander medisch-wetenschappelijk onderzoek meedoet;
- Alles vertelt aan uw onderzoekarts wat u weet over uw gezondheid en de medicijnen die u nu inneemt of mee begint tijdens het onderzoek. Bepaalde geneesmiddelen mogen niet gebruikt worden tijdens uw deelname aan het onderzoek. Als u dat niet doet, brengt u mogelijk uw eigen gezondheid in gevaar;
- Niet zwanger bent, wordt of borstvoeding geeft tijdens dit onderzoek. Overleg met uw arts over geschikte voorbehoedsmiddelen;
- De behandeling dient te onderbreken in overleg met u en de begeleidend onderzoekarts. Dit kan gebeuren als u symptomen heeft van een infectie, afwijkende bloedresultaten of een operatie moet ondergaan. Geef dit dan ook zo snel mogelijk door aan uw arts;

Het is belangrijk dat u contact opneemt met de onderzoeker:

- voordat u andere geneesmiddelen gaat gebruiken. Ook als dat homeopathische geneesmiddelen, natuurgeneesmiddelen, vitaminen en/of geneesmiddelen van de drogist zijn;
- als u in een ziekenhuis wordt opgenomen of behandeld;

## Proefpersoneninformatie

- als u plotseling gezondheidsklachten krijgt;
- als u zwanger wordt;
- als u niet meer wilt meedoen aan het onderzoek;
- als uw contactgegevens wijzigen.

## 6. Mogelijke risico's van deelname aan dit onderzoek

Elk geneesmiddel kan bijwerkingen geven of onvoorziene reacties veroorzaken. Bovendien kan iedere patiënt anders reageren op dezelfde dosering van het hetzelfde geneesmiddel. Het is mogelijk dat het geneesmiddel dat u gebruikt uw aandoening, de ziekte van Crohn, niet doeltreffend onder controle brengt.

### Bijwerkingen

Lees aandachtig bijlage C door met meer uitgebreide informatie over bijwerkingen en risico's. Doet u mee aan het onderzoek? Dan krijgt u de bijsluiter mee met het middel.

### Bloedafnames

Bloedafnames kunnen pijn doen of een bloeditstorting geven. Alles bij elkaar nemen we maximaal 4 buisjes bloed af tijdens de eerste 3 maanden van de studie, wat neerkomt op 34 ml bloed in totaal. Deze hoeveelheid geeft bij volwassenen geen problemen. Ter vergelijking: bij de bloedbank wordt 500 ml bloed per keer afgenomen. U kunt een gevoel van flauwte ervaren tijdens afname. Tijdens een bloedafname kan een prikaccident optreden, een verwonding met een naald waarbij het mogelijk is dat de persoon besmet raakt met een bloed overdraagbare aandoening zoals een virus. Ook een infectie is een mogelijk risico.

### Zwangerschap

Vrouwen die zwanger zijn of borstvoeding geven, kunnen niet meedoen aan dit onderzoek. Ook mogen vrouwen niet zwanger worden tijdens het onderzoek. De onderzoeker kan met u over geschikte voorbehoedsmiddelen praten. Vertel het uw arts onmiddellijk als u zwanger raakt.

## 7. Mogelijke voor- en nadelen

Het is belangrijk dat u de mogelijke voor- en nadelen goed afweegt voordat u besluit mee te doen. Naltrexon kan de ontstekingsactiviteit in de darmen verminderen, maar zeker is dat niet. Ieder individu reageert verschillend.

Nadelen van meedoen aan het onderzoek kunnen zijn:

- mogelijke bijwerkingen;
- mogelijke ongemakken van de metingen in het onderzoek.

## Proefpersoneninformatie

Deelname aan het onderzoek betekent ook:

- dat u extra tijd kwijt bent;
- dat extra testen afgenomen worden;
- dat u afspraken heeft waaraan u zich moet houden.

Al deze zaken zijn hiervoor onder punt 4, 5 en 6 beschreven.

## 8. Als u niet wilt meedoen of wilt stoppen met het onderzoek

U beslist zelf of u meedoet aan het onderzoek. Deelname is vrijwillig. Als u niet wil meedoen, wordt u op de gebruikelijke manier behandeld voor uw ziekte van Crohn. Uw arts kan u meer vertellen over de behandelingsmogelijkheden die er zijn en de voor- en nadelen daarvan.

Als u wel meedoet, kunt u zich altijd bedenken en toch stoppen, ook tijdens het onderzoek.

U wordt dan weer op de gebruikelijke manier behandeld voor uw ziekte van Crohn. U hoeft niet te zeggen waarom u stopt. Wel moet u dit direct melden aan de onderzoeker. De gegevens die tot dat moment zijn verzameld, worden gebruikt voor het onderzoek.

Als er nieuwe informatie over het onderzoek is die belangrijk voor u is, laat de onderzoeker dit aan u weten. U wordt dan gevraagd of u blijft meedoen.

## 9. Einde van het onderzoek

Uw deelname aan het onderzoek stopt als

- alle bezoeken volgens het schema (bijlage B) zijn voltooid;
- het einde van het hele onderzoek is bereikt;
- u zelf kiest om te stoppen;
- u zwanger wordt;
- de onderzoeker het beter voor u vindt om te stoppen;
- de overheid of de beoordelende medisch-ethische toetsingscommissie, besluit om het onderzoek te stoppen.

Het hele onderzoek is afgelopen als alle deelnemers klaar zijn. De medicatie die u gebruikt heeft bij het onderzoek, is ook beschikbaar na afloop van het onderzoek aangezien het om in Nederland geregistreerde medicijnen gaat. De onderzoeker zal met u praten over de mogelijkheden voor verdere medische zorg.

Na het verwerken van alle gegevens informeert de onderzoeker u over de belangrijkste uitkomsten van het onderzoek. Dit gebeurt ongeveer 2 jaar na uw deelname.

## 10. Gebruik en bewaren van uw gegevens en lichaamsmateriaal

Voor dit onderzoek worden uw persoonsgegevens en lichaamsmateriaal verzameld, gebruikt en bewaard. Het gaat om gegevens zoals uw naam, geboortedatum en om gegevens over uw gezondheid waarvoor we uw elektronisch patiëntendossier inzien.

## Proefpersoneninformatie

Voor dit onderzoek is bloed en ontlasting nodig. Het verzamelen, gebruiken en bewaren van uw gegevens en uw lichaamsmateriaal is nodig om de vragen die in dit onderzoek worden gesteld te kunnen beantwoorden en de resultaten te kunnen publiceren. Wij vragen voor het gebruik van uw gegevens en lichaamsmateriaal uw toestemming.

### **Vertrouwelijkheid van uw gegevens en lichaamsmateriaal**

Om uw privacy te beschermen krijgen uw gegevens en uw lichaamsmateriaal een code. Uw naam en andere gegevens die u direct kunnen identificeren worden daarbij weggelaten. Alleen met de sleutel van de code zijn gegevens tot u te herleiden. De sleutel van de code blijft veilig opgeborgen in de lokale onderzoeksinstelling. De gegevens en lichaamsmateriaal die naar de onderzoeker worden gestuurd bevatten alleen de code, maar niet uw naam of andere gegevens waarmee u kunt worden geïdentificeerd. Ook in rapporten en publicaties over het onderzoek zijn de gegevens niet tot u te herleiden. Indien uw ziekenhuis gebruik maakt van het verzenden van studiemedicatie naar uw huisadres, worden uw naam en adresgegevens wel doorgegeven aan de apotheek van het Erasmus MC door middel van het voorgeschreven recept. U kunt hiervoor akkoord geven op het toestemmingsformulier.

### **Toegang tot uw gegevens voor controle**

De onderzoekers kunnen op de onderzoekslocatie toegang krijgen tot al uw gegevens. Ook tot de gegevens zonder code. Dit is nodig om te kunnen controleren of het onderzoek goed en betrouwbaar is uitgevoerd. Personen die ter controle inzage krijgen in uw gegevens zijn de commissie die de veiligheid van het onderzoek in de gaten houdt, een monitor die door de onderzoeker is ingehuurd en de Inspectie Gezondheidszorg en Jeugd. Zij houden uw gegevens geheim. Wij vragen u voor deze inzage toestemming te geven.

### **Bewaartermijn gegevens en lichaamsmateriaal voor dit onderzoek**

Uw gegevens moeten 15 jaar worden bewaard op de onderzoekslocatie na het beëindigen van de studie. Het wordt bewaard om daarop in de loop van dit onderzoek nog nieuwe bepalingen te kunnen doen die te maken hebben met dit onderzoek.

### **Bewaren en gebruik van gegevens en lichaamsmateriaal voor ander onderzoek**

Uw gegevens en lichaamsmateriaal kunnen na afloop van dit onderzoek ook nog van belang zijn voor ander wetenschappelijk onderzoek op het gebied van de ziekte van Crohn. U kunt op het toestemmingsformulier aangeven of u hier wel of niet mee instemt. Indien u hier niet mee instemt, kunt u gewoon deelnemen aan het huidige onderzoek.

### **Informatie over onverwachte bevindingen**

Tijdens dit onderzoek kan er bij toeval iets gevonden worden dat niet van belang is voor het onderzoek maar wel voor u. Als dit belangrijk is voor uw gezondheid, dan zult u op de hoogte worden gesteld door uw behandelend arts of de arts-onderzoeker. U kunt dan met uw huisarts of specialist bespreken wat er gedaan moet worden. Ook hiervoor geeft u toestemming.

Proefpersoneninformatie

### **Intrekken toestemming**

U kunt uw toestemming voor gebruik van uw persoonsgegevens altijd weer intrekken. Dit geldt voor dit onderzoek en ook voor het bewaren en het gebruik voor het toekomstige onderzoek. De onderzoeksgegevens die zijn verzameld tot het moment dat u uw toestemming intrekt worden nog wel gebruikt in het onderzoek. Uw lichaamsmateriaal wordt na intrekking van uw toestemming vernietigd. Als er al metingen met dat lichaamsmateriaal zijn gedaan, dan worden die gegevens nog wel gebruikt.

### **Meer informatie over uw rechten bij verwerking van gegevens**

Voor algemene informatie over uw rechten bij verwerking van uw persoonsgegevens kunt u de website van de Autoriteit Persoonsgegevens raadplegen: [www.erasmusmc.nl/cs-patientenzorg/372137/379076/bescherming.persoonsgegevens](http://www.erasmusmc.nl/cs-patientenzorg/372137/379076/bescherming.persoonsgegevens)

Bij vragen over uw rechten kunt u contact opnemen met de verantwoordelijke voor de verwerking van uw persoonsgegevens. Voor dit onderzoek is dat: *Erasmus Medisch Centrum*. Zie bijlage A voor contactgegevens.

Bij vragen of klachten over de verwerking van uw persoonsgegevens raden we u aan eerst contact op te nemen met de onderzoekslocatie. U kunt ook contact opnemen met de Functionaris voor de Gegevensbescherming van de instelling of de Autoriteit Persoonsgegevens, tevens opgenomen in bijlage A.

### **Registratie van het onderzoek**

Informatie over dit onderzoek is ook opgenomen in een overzicht van medisch-wetenschappelijke onderzoeken ([www.trialregister.nl](http://www.trialregister.nl)). Op deze site zijn geen gegevens opgenomen die naar u herleidbaar zijn. Na het onderzoek kan de website een samenvatting van de resultaten van dit onderzoek tonen.

## **11. Verzekering voor proefpersonen**

Voor iedereen die meedoet aan dit onderzoek is een verzekering afgesloten. De verzekering dekt schade door het onderzoek. Niet alle schade is gedekt. In bijlage D vindt u meer informatie over de verzekering en de uitzonderingen. Daar staat ook aan wie u schade kunt melden.

## **12. Informeren huisarts, behandelend specialist en apotheker**

Wij laten uw huisarts weten dat u meedoet aan het onderzoek. Het is ook mogelijk dat wij andere medisch specialisten waarbij u onder behandeling bent informeren over uw deelname aan dit onderzoek indien nodig. Dit is voor uw eigen veiligheid. Als u dit niet goed vindt, kunt u niet meedoen aan dit onderzoek. Als u geen huisarts heeft, kunt u niet deelnemen aan het onderzoek.

Proefpersoneninformatie

### 13. Vergoeding voor meedoen

De studiemedicatie, extra testen en behandeling voor het onderzoek kosten u niets. U wordt niet betaald voor het meedoen aan dit onderzoek. Bezoeken aan een arts, andere behandelingen of tests die geen deel uitmaken van dit onderzoek worden niet betaald.

### 14. Heeft u vragen?

Bij vragen kunt u contact opnemen met de onderzoeker. Voor onafhankelijk advies over meedoen aan dit onderzoek kunt u terecht bij de onafhankelijke arts. Hij weet veel over het onderzoek, maar heeft niets te maken met dit onderzoek.

Indien u klachten heeft over het onderzoek, kunt u dit bespreken met de onderzoeker of uw behandelend arts. Wilt u dit liever niet, dan kunt u zich wenden tot de klachtenfunctionaris/klachtencommissie.

Alle gegevens vindt u in bijlage A: Contactgegevens.

### 15. Ondertekening toestemmingsformulier

Wanneer u voldoende bedenktijd heeft gehad, wordt u gevraagd te beslissen over deelname aan dit onderzoek. Indien u toestemming geeft, zullen wij u vragen deze op de bijbehorende toestemmingsverklaring schriftelijk te bevestigen. Door uw schriftelijke toestemming geeft u aan dat u de informatie heeft begrepen en instemt met deelname aan het onderzoek.

Zowel uzelf als de onderzoeker ontvangen een getekende versie van deze toestemmingsverklaring.

Dank voor uw aandacht.



Proefpersoneninformatie

## 16. Bijlagen bij deze informatie

- A. Contactgegevens
- B. Onderzoeks- en behandelingsprocedures
- C. Bijwerkingen en risico's
- D. Informatie over de verzekering
- E. Toestemmingsformulier proefpersoon
- F. Brochure 'Medisch-wetenschappelijk onderzoek. Algemene informatie voor de proefpersoon' (2017)

For peer review only

Proefpersoneninformatie

## Bijlage A: Contactgegevens Erasmus MC

Als u vragen hebt over uw deelname aan dit onderzoek of uw rechten als deelnemer aan een onderzoek, of als u problemen of klachten heeft betreffende deelname aan het onderzoek, kunt u contact opnemen met de onderzoeksarts.

### Arts-onderzoeker:

drs. E. Paulides, Afdeling Maag-, Darm- en Leverziekten

Email adres: [e.paulides@erasmusmc.nl](mailto:e.paulides@erasmusmc.nl)

Hoofdonderzoeker: professor dr C.J. van der Woude. U kunt haar bereiken via arts-onderzoeker E. Paulides of via het secretariaat 010 7031693.

Centraal nummer Erasmus Medisch Centrum.

Telefoonnummer: 010 - 704 07 04

### Onafhankelijk deskundige

Als u zich zorgen maakt over uw deelname, kunt u een persoon raadplegen die niet betrokken is bij het onderzoek maar wel deskundige is op het gebied van dit onderzoek.

Dr. R.J. de Knecht, telefoonnummer secretaresse: 010 - 7035942

### Klachten

Als u niet tevreden bent over het onderzoek, kunt u terecht bij de onafhankelijke klachtencommissie van het Erasmus MC.

Telefoonnummer: 010 – 703 31 98

### Bescherming persoonsgegevens

Heeft u vragen of opmerkingen over de bescherming van uw privacy?

Neem dan contact op met de functionaris gegevensbescherming (FG) van het Erasmus MC

<https://www.erasmusmc.nl/nl-nl/patientenzorg/privacy>

E-mail [functionaris.gegevensbescherming@erasmusmc.nl](mailto:functionaris.gegevensbescherming@erasmusmc.nl)

Telefoonnummer: 010 – 703 49 86

## Bijlage B: Onderzoeksbehandeling en –procedures

### Inductie- en onderhoudsbehandeling

De behandeling tijdens de eerste 12 weken wordt de 'inductiebehandeling' genoemd. Het doel van de inductiebehandeling is de ontsteking in de darm tot rust te brengen. Daarna start de onderhoudsbehandeling, met als doel het voorkomen van nieuwe opvlammingen van uw ziekte van Crohn.

#### Week 0 t-m 12: inductiebehandeling

- Naltrexon 4.5 mg éénmaal daags of placebo. U en de onderzoekers weten niet welk middel u gedurende deze periode gebruikt.
- Als u corticosteroiden gebruikt worden deze rustig afgebouwd.

#### Week 12 t-m 52: onderhoudsbehandeling

- U kunt na 12 weken kiezen om het medicijn Naltrexon te gebruiken tot week 52, om de effecten op langere termijn te onderzoeken. U en de onderzoekers weten dan tijdens deze periode wel dat u het middel Naltrexon gebruikt. Wat u tijdens de eerste 12 weken heeft gebruikt blijft onbekend.

Als iets voorvalt waardoor de volledige dosis niet kan worden ingenomen of als u vragen of zorgen heeft over het geneesmiddel, neem dan onmiddellijk contact op met uw onderzoekscentrum voor verdere instructies.

| Bezoeken of metingen                    | Beschrijving                                                                                                                                             |
|-----------------------------------------|----------------------------------------------------------------------------------------------------------------------------------------------------------|
| Lichamelijk onderzoek vitale parameters | Tijdens onderzoeksbezoeken zal alleen een specifiek lichamelijk onderzoek plaatsvinden op indicatie, gebaseerd op uw symptomen.                          |
| Ontlasting inleveren                    | Bij het polibezoek van week 12 wordt u gevraagd ontlasting in een potje op te vangen. Dit potje kunt u inleveren bij de arts/onderzoeker of bloedafname. |
| Vragenlijsten                           | Als u het ziekenhuis bezoekt of een telefonische afspraak heeft wordt u gevraagd om online vragenlijsten in te vullen over uw algehele welzijn.          |
| Endoscopie                              | Bij voorkeur wordt er een kijkonderzoek van de darm uitgevoerd om de ziekteactiviteit in de darm te observeren na 12 weken en eventueel na 52 weken.     |

Denk eraan dat het mogelijk is dat we u vragen een procedure of test te herhalen als uw onderzoeksarts van mening is dat dit nodig is om uw aandoening te evalueren.

## Proefpersoneninformatie

|                                                                                   | <b>Geschiktheids-<br/>onderzoek</b> | <b>Inductiebehandeling</b> |                   |                    |                    |                    | <b>Onderhoudsbehandeling</b> |                    |                    |
|-----------------------------------------------------------------------------------|-------------------------------------|----------------------------|-------------------|--------------------|--------------------|--------------------|------------------------------|--------------------|--------------------|
| <b>Onderzoeks-<br/>procedures</b>                                                 | <b>Screening</b>                    | <b>Week<br/>0</b>          | <b>Week<br/>2</b> | <b>Week<br/>4*</b> | <b>Week<br/>8*</b> | <b>Week<br/>12</b> | <b>Week<br/>24</b>           | <b>Week<br/>36</b> | <b>Week<br/>52</b> |
| <i>Poliklinisch bezoek</i>                                                        | X                                   |                            |                   | X                  |                    | X                  | X                            |                    | X                  |
| <i>Telefonisch consult</i>                                                        |                                     | X                          | X                 |                    | X                  |                    |                              | X                  |                    |
| Medische<br>voorgeschiedenis                                                      | X                                   |                            |                   |                    |                    |                    |                              |                    |                    |
| Lichamelijk onderzoek <sup>a</sup>                                                | (X)                                 |                            |                   |                    |                    |                    |                              |                    |                    |
| Medicijngebruik                                                                   | X                                   |                            | X                 | X                  | X                  | X                  | X                            | X                  | X                  |
| Bloedonderzoek <sup>b</sup>                                                       | X                                   |                            |                   | X                  |                    | X                  | X                            |                    | X                  |
| Ontlastingsmonster <sup>c</sup>                                                   | X                                   |                            |                   |                    |                    | X                  | X                            |                    | X                  |
| Vragenlijst ziekteactiviteit <sup>d</sup>                                         | X                                   |                            | X                 | X                  | X                  | X                  | X                            | X                  | X                  |
| Vragenlijst kwaliteit van<br>leven, gezondheid,<br>moeheid, stemming <sup>e</sup> | X                                   |                            |                   | X                  |                    | X                  | X                            |                    | X                  |
| Coloscopie <sup>f</sup>                                                           | X                                   |                            |                   |                    |                    | X                  |                              |                    | (X)                |

a Lichamelijk onderzoek kan omvatten lengte, gewicht, vitale functies, onderzoek van de buik en zo nodig hart en longen

b In het bloed worden bloedcellen en ontstekingswaarden onderzocht

c In de stoelgang wordt het stofje fecaal calprotectine (FCP) gemeten ter beoordeling van de ziekteactiviteit van uw darmziekte

d Hierbij wordt door middel van enkele vragen de ziekteactiviteit gemeten

e Er wordt 1 vragenlijst afgenomen over de ziekteactiviteit, 1 over uw kwaliteit van leven, 2 over algemene gezondheid, 2 over moeheid en 3 over stemming.

f Bij voorkeur wordt er een kijkonderzoek van de darm uitgevoerd om de ziekteactiviteit in de darm te observeren

## Bijlage C: Bijwerkingen en risico's

### Bijwerkingen

De medicatie wordt in een hele lage dosering voorgeschreven, maar kan in theorie bijwerkingen geven. In eerdere studies met kleine aantallen patiënten werden de volgende bijwerkingen genoemd: levendige dromen, slaperigheid, hoofdpijn.

Tekenen van allergische reacties kunnen zijn: beklemmend gevoel op de borst, piepende ademhaling, ernstige duizeligheid of een licht gevoel in het hoofd, zwellingen van de lippen, tong of keel, jeuk of huiduitslag. Neem direct contact op met uw huisarts en breng de arts-onderzoeker op de hoogte.

Bij hoge dosering Naltrexon komen de volgende bijwerkingen *zeer vaak* voor (1 op de 10 mensen): hoofdpijn, slaapstoornissen, onrust, nervositeit, angst, buikpijn, buikkrampen, misselijkheid, braken, gewrichtspijn, spierpijn, lichaamsszwakte.

Bij hoge dosering Naltrexon komen de volgende bijwerkingen *vaak* voor (1 op de 10 mensen): verminderde eetlust, diarree, obstipatie, dorst, koude rillingen, verhoogde energie, prikkelbaarheid, stemmingswisselingen, affectiestoornis, duizeligheid, huiduitslag, vertraagde ejaculatie, erectiele disfunctie, snelle hartslag, hartkloppingen, pijn in borstkas, verandering in hartfilmpje, toegenomen transpiratie, verhoogde traanproductie, urineretentie.

### Interacties met andere geneesmiddelen

Het wordt afgeraden om gelijktijdig geneesmiddelen te gebruiken die opioïden bevatten. Combinatie met middelen die toxisch zijn voor de lever vermijden. Vermijd zo mogelijk combinatie met centraal werkende medicatie bij hoge bloeddruk zoals alfa-methyldopa.

Wees voorzichtig met combineren met de volgende middelen: barbituraten, benzodiazepinen, andere anxiolytica zoals meprobamaat, hypnotica, sedatieve antidepressiva (bv. amitriptyline, doxepine, mianserine), sedatieve antihistaminica en neuroleptica zoals droperidol.

Naltrexon verhoogt de plasmaspiegel van acamprosaat.

## Bijlage D: Informatie over de verzekering

Voor iedereen die meedoet aan dit onderzoek, heeft de verrichter een verzekering afgesloten. De verzekering dekt schade door deelname aan het onderzoek. Dit geldt voor schade tijdens het onderzoek of binnen vier jaar na het einde van uw deelname aan het onderzoek. Schade moet u binnen die vier jaar aan de verzekeraar hebben gemeld.

De verzekering dekt niet alle schade. Onderaan deze tekst staat in het kort welke schade niet wordt gedekt.

Deze bepalingen staan in het Besluit verplichte verzekering bij medisch-wetenschappelijk onderzoek met mensen. Dit besluit staat op [www.ccmo.nl](http://www.ccmo.nl), de website van de Centrale Commissie Mensgebonden Onderzoek (zie 'Bibliotheek' en dan 'Wet- en regelgeving').

Bij schade kunt u direct contact leggen met de verzekeraar.

De verzekeraar van het onderzoek is:

Naam: CNA Insurance Company Limited

Adres: Polarisavenue 140, 2134 JX Hoofddorp

Telefoonnummer: +31(0)23-3036004, +31(0)638059413 ...

E-mail: [claimsnetherlands@cna Hardy.com](mailto:claimsnetherlands@cna Hardy.com) ...

De verzekering biedt een dekking van maximaal € 650.000 per proefpersoon en € 5.000.000 voor het hele onderzoek € 7.500.000 per jaar voor alle onderzoeken van dezelfde opdrachtgever.

De verzekering dekt de volgende schade **niet**:

- schade door een risico waarover u in de schriftelijke informatie bent ingelicht. Dit geldt niet als het risico zich ernstiger voordoet dan was voorzien of als het risico heel onwaarschijnlijk was;
- schade aan uw gezondheid die ook zou zijn ontstaan als u niet aan het onderzoek had meegedaan;
- schade door het niet (volledig) opvolgen van aanwijzingen of instructies;
- schade aan uw nakomelingen, als gevolg van een negatief effect van het onderzoek op u of uw nakomelingen;
- schade door een bestaande behandelmethode bij onderzoek naar bestaande behandelmethoden.

## Bijlage E: Toestemmingsformulier proefpersoon

### Lage dosering Naltrexon voor het in remissie brengen van de ziekte van Crohn

- Ik heb de informatiebrief gelezen. Ook kon ik vragen stellen. Mijn vragen zijn voldoende beantwoord. Ik had genoeg tijd om te beslissen of ik meedoe.
- Ik weet dat meedoen vrijwillig is. Ook weet ik dat ik op ieder moment kan beslissen om toch niet mee te doen of te stoppen met het onderzoek. Daarvoor hoef ik geen reden te geven.
- Ik geef toestemming voor het informeren van mijn huisarts/behandelend specialist/apotheker op de hoogte wordt/worden gebracht dat ik meedoe aan dit onderzoek.
- Ik geef toestemming voor het verzamelen en gebruiken van mijn medische gegevens, bloedmonsters en lichaamsmateriaal voor de beantwoording van de onderzoeksvraag in dit onderzoek.
- Ik weet dat voor de controle van het onderzoek sommige mensen toegang tot al mijn gegevens kunnen krijgen. Die mensen staan vermeld in deze informatiebrief. Ik geef toestemming voor die inzage door deze personen.
- Ik geef toestemming voor het informeren van mijn huisarts en/of behandelend specialist van onverwachte bevindingen die van belang (kunnen) zijn voor mijn gezondheid.
- Ik weet dat ik niet zwanger mag worden tijdens het onderzoek
- Ik geef toestemming voor het verstrekken van mijn naam en adresgegevens middels een recept aan de apotheek van het Erasmus MC.
- Ik geef  **wel**  
 **geen**  
toestemming om mijn lichaamsmateriaal en persoonsgegevens na dit onderzoek te bewaren en om dit later nog voor toekomstig onderzoek te gebruiken, zoals in de informatiebrief staat.
- Ik wil meedoen aan dit onderzoek.

-----  
Naam proefpersoon:

Handtekening:

Datum: \_\_ / \_\_ / \_\_

-----  
Ik verklaar dat ik deze proefpersoon volledig heb geïnformeerd over het genoemde onderzoek. Als er tijdens het onderzoek informatie bekend wordt die de toestemming van de proefpersoon zou kunnen beïnvloeden, dan breng ik hem/haar daarvan tijdig op de hoogte.

Naam onderzoeker (of diens vertegenwoordiger):

Handtekening:

Datum: \_\_ / \_\_ / \_\_

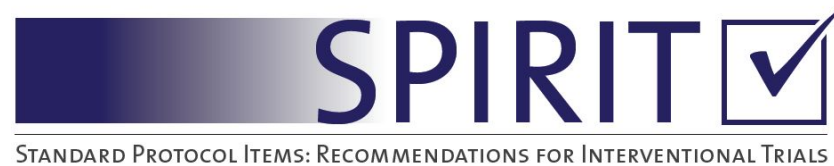

SPIRIT 2013 Checklist: Recommended items to address in a clinical trial protocol and related documents\*

| Section/item                      | Item No | Description                                                                                                                                                                                                                                                                              | Addressed on page number |
|-----------------------------------|---------|------------------------------------------------------------------------------------------------------------------------------------------------------------------------------------------------------------------------------------------------------------------------------------------|--------------------------|
| <b>Administrative information</b> |         |                                                                                                                                                                                                                                                                                          |                          |
| Title                             | 1       | Descriptive title identifying the study design, population, interventions, and, if applicable, trial acronym                                                                                                                                                                             | ___ 1 ___                |
| Trial registration                | 2a      | Trial identifier and registry name. If not yet registered, name of intended registry                                                                                                                                                                                                     | ___ 1 & 6 ___            |
|                                   | 2b      | All items from the World Health Organization Trial Registration Data Set                                                                                                                                                                                                                 | _____                    |
| Protocol version                  | 3       | Date and version identifier                                                                                                                                                                                                                                                              | ___ 1&3 ___              |
| Funding                           | 4       | Sources and types of financial, material, and other support                                                                                                                                                                                                                              | ___ 1 ___                |
| Roles and responsibilities        | 5a      | Names, affiliations, and roles of protocol contributors                                                                                                                                                                                                                                  | ___ 1 ___                |
|                                   | 5b      | Name and contact information for the trial sponsor                                                                                                                                                                                                                                       | ___ 1 ___                |
|                                   | 5c      | Role of study sponsor and funders, if any, in study design; collection, management, analysis, and interpretation of data; writing of the report; and the decision to submit the report for publication, including whether they will have ultimate authority over any of these activities | ___ 1 ___                |
|                                   | 5d      | Composition, roles, and responsibilities of the coordinating centre, steering committee, endpoint adjudication committee, data management team, and other individuals or groups overseeing the trial, if applicable (see Item 21a for data monitoring committee)                         | _____                    |



|    |                                                           |     |                                                                                                               |               |
|----|-----------------------------------------------------------|-----|---------------------------------------------------------------------------------------------------------------|---------------|
| 1  | <b>Introduction</b>                                       |     |                                                                                                               |               |
| 2  |                                                           |     |                                                                                                               |               |
| 3  | Background and                                            | 6a  | Description of research question and justification for undertaking the trial, including summary of relevant   | _____ 3 _____ |
| 4  | rationale                                                 |     | studies (published and unpublished) examining benefits and harms for each intervention                        |               |
| 5  |                                                           |     |                                                                                                               |               |
| 6  |                                                           | 6b  | Explanation for choice of comparators                                                                         | _____ 3 _____ |
| 7  |                                                           |     |                                                                                                               |               |
| 8  | Objectives                                                | 7   | Specific objectives or hypotheses                                                                             | _____ 3 _____ |
| 9  |                                                           |     |                                                                                                               |               |
| 10 | Trial design                                              | 8   | Description of trial design including type of trial (eg, parallel group, crossover, factorial, single group), |               |
| 11 |                                                           |     | allocation ratio, and framework (eg, superiority, equivalence, noninferiority, exploratory)                   | _____ 3 _____ |
| 12 |                                                           |     |                                                                                                               |               |
| 13 |                                                           |     |                                                                                                               |               |
| 14 | <b>Methods: Participants, interventions, and outcomes</b> |     |                                                                                                               |               |
| 15 |                                                           |     |                                                                                                               |               |
| 16 | Study setting                                             | 9   | Description of study settings (eg, community clinic, academic hospital) and list of countries where data will | _____ 4 _____ |
| 17 |                                                           |     | be collected. Reference to where list of study sites can be obtained                                          |               |
| 18 |                                                           |     |                                                                                                               |               |
| 19 | Eligibility criteria                                      | 10  | Inclusion and exclusion criteria for participants. If applicable, eligibility criteria for study centres and  | _____ 4 _____ |
| 20 |                                                           |     | individuals who will perform the interventions (eg, surgeons, psychotherapists)                               |               |
| 21 |                                                           |     |                                                                                                               |               |
| 22 | Interventions                                             | 11a | Interventions for each group with sufficient detail to allow replication, including how and when they will be | _____ 5 _____ |
| 23 |                                                           |     | administered                                                                                                  |               |
| 24 |                                                           |     |                                                                                                               |               |
| 25 |                                                           | 11b | Criteria for discontinuing or modifying allocated interventions for a given trial participant (eg, drug dose  | _____ 6 _____ |
| 26 |                                                           |     | change in response to harms, participant request, or improving/worsening disease)                             |               |
| 27 |                                                           |     |                                                                                                               |               |
| 28 |                                                           | 11c | Strategies to improve adherence to intervention protocols, and any procedures for monitoring adherence        | _____ 5 _____ |
| 29 |                                                           |     | (eg, drug tablet return, laboratory tests)                                                                    |               |
| 30 |                                                           |     |                                                                                                               |               |
| 31 |                                                           |     |                                                                                                               |               |
| 32 |                                                           | 11d | Relevant concomitant care and interventions that are permitted or prohibited during the trial                 | _____ 5 _____ |
| 33 |                                                           |     |                                                                                                               |               |
| 34 | Outcomes                                                  | 12  | Primary, secondary, and other outcomes, including the specific measurement variable (eg, systolic blood       |               |
| 35 |                                                           |     | pressure), analysis metric (eg, change from baseline, final value, time to event), method of aggregation (eg, | _____ 6 _____ |
| 36 |                                                           |     | median, proportion), and time point for each outcome. Explanation of the clinical relevance of chosen         |               |
| 37 |                                                           |     | efficacy and harm outcomes is strongly recommended                                                            |               |
| 38 |                                                           |     |                                                                                                               |               |
| 39 |                                                           |     |                                                                                                               |               |
| 40 | Participant timeline                                      | 13  | Time schedule of enrolment, interventions (including any run-ins and washouts), assessments, and visits for   | _____ 5 _____ |
| 41 |                                                           |     | participants. A schematic diagram is highly recommended (see Figure)                                          |               |
| 42 |                                                           |     |                                                                                                               |               |
| 43 |                                                           |     |                                                                                                               |               |
| 44 |                                                           |     |                                                                                                               |               |
| 45 |                                                           |     |                                                                                                               |               |
| 46 |                                                           |     |                                                                                                               |               |

|   |             |    |                                                                                                                                                                                       |             |
|---|-------------|----|---------------------------------------------------------------------------------------------------------------------------------------------------------------------------------------|-------------|
| 1 | Sample size | 14 | Estimated number of participants needed to achieve study objectives and how it was determined, including clinical and statistical assumptions supporting any sample size calculations | _____6_____ |
| 2 |             |    |                                                                                                                                                                                       |             |
| 3 |             |    |                                                                                                                                                                                       |             |
| 4 | Recruitment | 15 | Strategies for achieving adequate participant enrolment to reach target sample size                                                                                                   | _____6_____ |
| 5 |             |    |                                                                                                                                                                                       |             |

### 6 **Methods: Assignment of interventions (for controlled trials)**

#### 7 Allocation:

|    |                    |     |                                                                                                                                                                                                                                                                                                                                                          |             |
|----|--------------------|-----|----------------------------------------------------------------------------------------------------------------------------------------------------------------------------------------------------------------------------------------------------------------------------------------------------------------------------------------------------------|-------------|
| 8  |                    |     |                                                                                                                                                                                                                                                                                                                                                          |             |
| 9  |                    |     |                                                                                                                                                                                                                                                                                                                                                          |             |
| 10 | Sequence           | 16a | Method of generating the allocation sequence (eg, computer-generated random numbers), and list of any factors for stratification. To reduce predictability of a random sequence, details of any planned restriction (eg, blocking) should be provided in a separate document that is unavailable to those who enrol participants or assign interventions | _____6_____ |
| 11 | generation         |     |                                                                                                                                                                                                                                                                                                                                                          |             |
| 12 |                    |     |                                                                                                                                                                                                                                                                                                                                                          |             |
| 13 |                    |     |                                                                                                                                                                                                                                                                                                                                                          |             |
| 14 |                    |     |                                                                                                                                                                                                                                                                                                                                                          |             |
| 15 |                    |     |                                                                                                                                                                                                                                                                                                                                                          |             |
| 16 | Allocation         | 16b | Mechanism of implementing the allocation sequence (eg, central telephone; sequentially numbered, opaque, sealed envelopes), describing any steps to conceal the sequence until interventions are assigned                                                                                                                                                | _____6_____ |
| 17 | concealment        |     |                                                                                                                                                                                                                                                                                                                                                          |             |
| 18 | mechanism          |     |                                                                                                                                                                                                                                                                                                                                                          |             |
| 19 |                    |     |                                                                                                                                                                                                                                                                                                                                                          |             |
| 20 | Implementation     | 16c | Who will generate the allocation sequence, who will enrol participants, and who will assign participants to interventions                                                                                                                                                                                                                                | _____6_____ |
| 21 |                    |     |                                                                                                                                                                                                                                                                                                                                                          |             |
| 22 |                    |     |                                                                                                                                                                                                                                                                                                                                                          |             |
| 23 |                    |     |                                                                                                                                                                                                                                                                                                                                                          |             |
| 24 | Blinding (masking) | 17a | Who will be blinded after assignment to interventions (eg, trial participants, care providers, outcome assessors, data analysts), and how                                                                                                                                                                                                                | _____6_____ |
| 25 |                    |     |                                                                                                                                                                                                                                                                                                                                                          |             |
| 26 |                    |     |                                                                                                                                                                                                                                                                                                                                                          |             |
| 27 |                    | 17b | If blinded, circumstances under which unblinding is permissible, and procedure for revealing a participant's allocated intervention during the trial                                                                                                                                                                                                     | _____6_____ |
| 28 |                    |     |                                                                                                                                                                                                                                                                                                                                                          |             |
| 29 |                    |     |                                                                                                                                                                                                                                                                                                                                                          |             |
| 30 |                    |     |                                                                                                                                                                                                                                                                                                                                                          |             |

### 31 **Methods: Data collection, management, and analysis**

|    |                 |     |                                                                                                                                                                                                                                                                                                                                                                                                              |             |
|----|-----------------|-----|--------------------------------------------------------------------------------------------------------------------------------------------------------------------------------------------------------------------------------------------------------------------------------------------------------------------------------------------------------------------------------------------------------------|-------------|
| 32 |                 |     |                                                                                                                                                                                                                                                                                                                                                                                                              |             |
| 33 | Data collection | 18a | Plans for assessment and collection of outcome, baseline, and other trial data, including any related processes to promote data quality (eg, duplicate measurements, training of assessors) and a description of study instruments (eg, questionnaires, laboratory tests) along with their reliability and validity, if known. Reference to where data collection forms can be found, if not in the protocol | _____5_____ |
| 34 | methods         |     |                                                                                                                                                                                                                                                                                                                                                                                                              |             |
| 35 |                 |     |                                                                                                                                                                                                                                                                                                                                                                                                              |             |
| 36 |                 |     |                                                                                                                                                                                                                                                                                                                                                                                                              |             |
| 37 |                 |     |                                                                                                                                                                                                                                                                                                                                                                                                              |             |
| 38 |                 |     |                                                                                                                                                                                                                                                                                                                                                                                                              |             |
| 39 |                 | 18b | Plans to promote participant retention and complete follow-up, including list of any outcome data to be collected for participants who discontinue or deviate from intervention protocols                                                                                                                                                                                                                    | _____5_____ |
| 40 |                 |     |                                                                                                                                                                                                                                                                                                                                                                                                              |             |
| 41 |                 |     |                                                                                                                                                                                                                                                                                                                                                                                                              |             |
| 42 |                 |     |                                                                                                                                                                                                                                                                                                                                                                                                              |             |

|    |                                 |     |                                                                                                                                                                                                                                                                                                                                       |             |
|----|---------------------------------|-----|---------------------------------------------------------------------------------------------------------------------------------------------------------------------------------------------------------------------------------------------------------------------------------------------------------------------------------------|-------------|
| 1  | Data management                 | 19  | Plans for data entry, coding, security, and storage, including any related processes to promote data quality (eg, double data entry; range checks for data values). Reference to where details of data management procedures can be found, if not in the protocol                                                                     | _____6_____ |
| 2  |                                 |     |                                                                                                                                                                                                                                                                                                                                       |             |
| 3  |                                 |     |                                                                                                                                                                                                                                                                                                                                       |             |
| 4  |                                 |     |                                                                                                                                                                                                                                                                                                                                       |             |
| 5  | Statistical methods             | 20a | Statistical methods for analysing primary and secondary outcomes. Reference to where other details of the statistical analysis plan can be found, if not in the protocol                                                                                                                                                              | _____7_____ |
| 6  |                                 |     |                                                                                                                                                                                                                                                                                                                                       |             |
| 7  |                                 |     |                                                                                                                                                                                                                                                                                                                                       |             |
| 8  |                                 | 20b | Methods for any additional analyses (eg, subgroup and adjusted analyses)                                                                                                                                                                                                                                                              | _____7_____ |
| 9  |                                 |     |                                                                                                                                                                                                                                                                                                                                       |             |
| 10 |                                 | 20c | Definition of analysis population relating to protocol non-adherence (eg, as randomised analysis), and any statistical methods to handle missing data (eg, multiple imputation)                                                                                                                                                       | _____       |
| 11 |                                 |     |                                                                                                                                                                                                                                                                                                                                       |             |
| 12 |                                 |     |                                                                                                                                                                                                                                                                                                                                       |             |
| 13 |                                 |     |                                                                                                                                                                                                                                                                                                                                       |             |
| 14 | <b>Methods: Monitoring</b>      |     |                                                                                                                                                                                                                                                                                                                                       |             |
| 15 |                                 |     |                                                                                                                                                                                                                                                                                                                                       |             |
| 16 | Data monitoring                 | 21a | Composition of data monitoring committee (DMC); summary of its role and reporting structure; statement of whether it is independent from the sponsor and competing interests; and reference to where further details about its charter can be found, if not in the protocol. Alternatively, an explanation of why a DMC is not needed | _____       |
| 17 |                                 |     |                                                                                                                                                                                                                                                                                                                                       |             |
| 18 |                                 |     |                                                                                                                                                                                                                                                                                                                                       |             |
| 19 |                                 |     |                                                                                                                                                                                                                                                                                                                                       |             |
| 20 |                                 |     |                                                                                                                                                                                                                                                                                                                                       |             |
| 21 |                                 |     |                                                                                                                                                                                                                                                                                                                                       |             |
| 22 |                                 | 21b | Description of any interim analyses and stopping guidelines, including who will have access to these interim results and make the final decision to terminate the trial                                                                                                                                                               | _____       |
| 23 |                                 |     |                                                                                                                                                                                                                                                                                                                                       |             |
| 24 |                                 |     |                                                                                                                                                                                                                                                                                                                                       |             |
| 25 | Harms                           | 22  | Plans for collecting, assessing, reporting, and managing solicited and spontaneously reported adverse events and other unintended effects of trial interventions or trial conduct                                                                                                                                                     | _____7_____ |
| 26 |                                 |     |                                                                                                                                                                                                                                                                                                                                       |             |
| 27 |                                 |     |                                                                                                                                                                                                                                                                                                                                       |             |
| 28 | Auditing                        | 23  | Frequency and procedures for auditing trial conduct, if any, and whether the process will be independent from investigators and the sponsor                                                                                                                                                                                           | _____       |
| 29 |                                 |     |                                                                                                                                                                                                                                                                                                                                       |             |
| 30 |                                 |     |                                                                                                                                                                                                                                                                                                                                       |             |
| 31 |                                 |     |                                                                                                                                                                                                                                                                                                                                       |             |
| 32 | <b>Ethics and dissemination</b> |     |                                                                                                                                                                                                                                                                                                                                       |             |
| 33 |                                 |     |                                                                                                                                                                                                                                                                                                                                       |             |
| 34 | Research ethics approval        | 24  | Plans for seeking research ethics committee/institutional review board (REC/IRB) approval                                                                                                                                                                                                                                             | _____7_____ |
| 35 |                                 |     |                                                                                                                                                                                                                                                                                                                                       |             |
| 36 |                                 |     |                                                                                                                                                                                                                                                                                                                                       |             |
| 37 | Protocol amendments             | 25  | Plans for communicating important protocol modifications (eg, changes to eligibility criteria, outcomes, analyses) to relevant parties (eg, investigators, REC/IRBs, trial participants, trial registries, journals, regulators)                                                                                                      | _____7_____ |
| 38 |                                 |     |                                                                                                                                                                                                                                                                                                                                       |             |
| 39 |                                 |     |                                                                                                                                                                                                                                                                                                                                       |             |
| 40 |                                 |     |                                                                                                                                                                                                                                                                                                                                       |             |
| 41 |                                 |     |                                                                                                                                                                                                                                                                                                                                       |             |
| 42 |                                 |     |                                                                                                                                                                                                                                                                                                                                       |             |

|    |                               |     |                                                                                                                                                                                                                                                                                     |             |
|----|-------------------------------|-----|-------------------------------------------------------------------------------------------------------------------------------------------------------------------------------------------------------------------------------------------------------------------------------------|-------------|
| 1  | Consent or assent             | 26a | Who will obtain informed consent or assent from potential trial participants or authorised surrogates, and how (see Item 32)                                                                                                                                                        | _____4_____ |
| 2  |                               |     |                                                                                                                                                                                                                                                                                     |             |
| 3  |                               |     |                                                                                                                                                                                                                                                                                     |             |
| 4  |                               | 26b | Additional consent provisions for collection and use of participant data and biological specimens in ancillary studies, if applicable                                                                                                                                               | _____       |
| 5  |                               |     |                                                                                                                                                                                                                                                                                     |             |
| 6  |                               |     |                                                                                                                                                                                                                                                                                     |             |
| 7  | Confidentiality               | 27  | How personal information about potential and enrolled participants will be collected, shared, and maintained in order to protect confidentiality before, during, and after the trial                                                                                                | _____       |
| 8  |                               |     |                                                                                                                                                                                                                                                                                     |             |
| 9  |                               |     |                                                                                                                                                                                                                                                                                     |             |
| 10 | Declaration of interests      | 28  | Financial and other competing interests for principal investigators for the overall trial and each study site                                                                                                                                                                       | _____9_____ |
| 11 |                               |     |                                                                                                                                                                                                                                                                                     |             |
| 12 |                               |     |                                                                                                                                                                                                                                                                                     |             |
| 13 | Access to data                | 29  | Statement of who will have access to the final trial dataset, and disclosure of contractual agreements that limit such access for investigators                                                                                                                                     | _____9_____ |
| 14 |                               |     |                                                                                                                                                                                                                                                                                     |             |
| 15 |                               |     |                                                                                                                                                                                                                                                                                     |             |
| 16 | Ancillary and post-trial care | 30  | Provisions, if any, for ancillary and post-trial care, and for compensation to those who suffer harm from trial participation                                                                                                                                                       | _____7_____ |
| 17 |                               |     |                                                                                                                                                                                                                                                                                     |             |
| 18 |                               |     |                                                                                                                                                                                                                                                                                     |             |
| 19 |                               |     |                                                                                                                                                                                                                                                                                     |             |
| 20 | Dissemination policy          | 31a | Plans for investigators and sponsor to communicate trial results to participants, healthcare professionals, the public, and other relevant groups (eg, via publication, reporting in results databases, or other data sharing arrangements), including any publication restrictions | _____       |
| 21 |                               |     |                                                                                                                                                                                                                                                                                     |             |
| 22 |                               |     |                                                                                                                                                                                                                                                                                     |             |
| 23 |                               |     |                                                                                                                                                                                                                                                                                     |             |
| 24 |                               | 31b | Authorship eligibility guidelines and any intended use of professional writers                                                                                                                                                                                                      | _____       |
| 25 |                               |     |                                                                                                                                                                                                                                                                                     |             |
| 26 |                               | 31c | Plans, if any, for granting public access to the full protocol, participant-level dataset, and statistical code                                                                                                                                                                     | _____9_____ |
| 27 |                               |     |                                                                                                                                                                                                                                                                                     |             |
| 28 |                               |     |                                                                                                                                                                                                                                                                                     |             |
| 29 | <b>Appendices</b>             |     |                                                                                                                                                                                                                                                                                     |             |
| 30 |                               |     |                                                                                                                                                                                                                                                                                     |             |
| 31 | Informed consent materials    | 32  | Model consent form and other related documentation given to participants and authorised surrogates                                                                                                                                                                                  | _____       |
| 32 |                               |     |                                                                                                                                                                                                                                                                                     |             |
| 33 |                               |     |                                                                                                                                                                                                                                                                                     |             |
| 34 | Biological specimens          | 33  | Plans for collection, laboratory evaluation, and storage of biological specimens for genetic or molecular analysis in the current trial and for future use in ancillary studies, if applicable                                                                                      | _____       |
| 35 |                               |     |                                                                                                                                                                                                                                                                                     |             |
| 36 |                               |     |                                                                                                                                                                                                                                                                                     |             |

\*It is strongly recommended that this checklist be read in conjunction with the SPIRIT 2013 Explanation & Elaboration for important clarification on the items. Amendments to the protocol should be tracked and dated. The SPIRIT checklist is copyrighted by the SPIRIT Group under the Creative Commons [“Attribution-NonCommercial-NoDerivs 3.0 Unported”](https://creativecommons.org/licenses/by-nc-nd/3.0/) license.

# BMJ Open

**Low Dose Naltrexone for the induction of remission in patients with mild to moderate Crohn's Disease: protocol for the randomized, double-blinded, placebo-controlled, multicentre LDN Crohn study.**

|                                 |                                                                                                                                                                                                                |
|---------------------------------|----------------------------------------------------------------------------------------------------------------------------------------------------------------------------------------------------------------|
| Journal:                        | <i>BMJ Open</i>                                                                                                                                                                                                |
| Manuscript ID                   | bmjopen-2021-058358.R1                                                                                                                                                                                         |
| Article Type:                   | Protocol                                                                                                                                                                                                       |
| Date Submitted by the Author:   | 08-Feb-2022                                                                                                                                                                                                    |
| Complete List of Authors:       | Paulides, Emma; Erasmus MC, Gastroenterology and Hepatology; Lie, Mitchell R.K.L.; Erasmus University Medical Center, Department of Gastroenterology & Hepatology van der Woude, Christien Janneke; Erasmus MC |
| <b>Primary Subject Heading</b>: | Gastroenterology and hepatology                                                                                                                                                                                |
| Secondary Subject Heading:      | Gastroenterology and hepatology, Pharmacology and therapeutics                                                                                                                                                 |
| Keywords:                       | Inflammatory bowel disease < GASTROENTEROLOGY, Adult gastroenterology < GASTROENTEROLOGY, Clinical trials < THERAPEUTICS                                                                                       |
|                                 |                                                                                                                                                                                                                |

SCHOLARONE™  
Manuscripts

1  
2 **Low Dose Naltrexone for the induction of remission in patients with mild to moderate Crohn's Disease:**  
3 **protocol for the randomized, double-blinded, placebo-controlled, multicentre LDN Crohn study.**  
4  
5  
6

7 Emma Paulides (MD)<sup>1</sup>, Mitchell R.K.L. Lie (MD, PhD)<sup>1</sup>, C. Janneke van der Woude (MD, PhD)<sup>1</sup>  
8

9 1. Department of Gastroenterology & Hepatology, Erasmus University Medical Center, Rotterdam,  
10 The Netherlands.  
11  
12

13  
14  
15 Short title: RCT with LDN for the induction of remission in CD.  
16

17 Word count: 2899  
18

19 Protocol version 4, June 2021  
20

21 Authors Contributions: CW conceived the idea for the study, designed the protocol and supervises study  
22 execution. ML designed the protocol and drafted the manuscript. EP designed the protocol, executes the  
23 study and drafted the manuscript. All authors provided critical revision of the manuscript for important  
24 intellectual content and approved the final draft of the protocol for submission.  
25  
26

27 Disclosures: Professor CJ van der Woude has served on advisory boards for Abbvie, Takeda, Pfizer and  
28 Celltrion. She is supported by research funding from ZonMW, Tramedico, and Pfizer.  
29

30 Funding: This work was supported by the Netherlands Organisation for Health Research and Development  
31 (ZonMw, Good use of medication, grant number 848082001). ZonMw is part of the Netherlands  
32 Organisation for Scientific Research (NWO).  
33  
34

35 Corresponding author:  
36

37 C.J. van der Woude, MD, PhD  
38 Erasmus University Medical Center  
39 Doctor Molewaterplein 40  
40 3015 GD Rotterdam, The Netherlands  
41 Email: [c.vanderwoude@erasmusmc.nl](mailto:c.vanderwoude@erasmusmc.nl)  
42  
43  
44  
45  
46  
47  
48  
49  
50  
51  
52  
53  
54  
55  
56  
57  
58  
59  
60

## ABSTRACT

**Introduction:** Crohn's disease (CD) is an inflammatory bowel disease (IBD). Several drugs exist to induce and maintain remission, but a significant part of the patients is refractory to current IBD drugs or experiences side effects. Whether low dose naltrexone (LDN) is a safe and easily accessible alternative treatment option for these patients needs to be investigated. The aim of this study is to assess the efficacy of LDN for the induction of remission in patients with mild to moderate CD.

**Methods and analysis:** The LDN Crohn study is a randomized, double-blinded, placebo-controlled multicentre trial. Patients with CD are randomized 1:1 to receive treatment with either LDN 4.5 mg once daily or placebo for 12 weeks. The primary objective is endoscopic remission at week 12, defined as SES-CD  $\leq 2$  and ulcerated surface subscore  $\leq 1$  in all five segments. Secondary aims include clinical and endoscopic response, changes in laboratory measures of inflammation, adverse events and patient-reported outcomes. To have 85% power to detect a true difference in the primary outcome measure between placebo and LDN, 61 patients will be needed in both groups.

**Ethics and dissemination:** The study is approved by the Medical Ethics Committee of the Erasmus MC, Rotterdam, the Netherlands (registration number NL69149.078.19, MEC-2019-0602). Results will be published in peer-reviewed journals and presented at international conferences.

**Trial registration numbers:** EudraCT registry (2019-000852-32); Dutch trial registry (NL9259).

### Strengths and limitations of this study

- The LDN Crohn study is the first randomized, double-blinded, placebo-controlled multicentre study that investigates the efficacy of low dose naltrexone for the induction of remission of mild to moderate Crohn's disease in adults.
- The results of this study will help to decide whether LDN might be an alternative option for inducing remission in patients with mild to moderate Crohn's disease.
- LDN is cheap and has a low adverse events profile.
- The National Crohn and colitis patient's organisation is involved and patient-reported outcomes are included.
- The mechanism of action and long-term safety aspects of LDN in patients with mild to moderate Crohn's disease are not yet fully understood.

## INTRODUCTION

Crohn's disease (CD) is a chronic, progressive, inflammatory disease of the gastrointestinal tract. Treatment strategies aim to induce sustained remission, by controlling inflammation and preventing complications of the disease. The last decade, an increasing number of new drugs with different mechanisms of action have been introduced to induce and/or maintain remission in CD. Although the currently available therapies are effective in many patients, all therapies have their individual safety concerns.(1) Immunosuppressive drugs or combination therapy with biologicals might induce bone marrow suppression, liver test abnormalities, malignancies and do have immunogenic risks.(2) Further, the introduction of biologicals resulted in increased drug and societal costs.(3) The lifelong nature of CD increases the probability that patients have cycled through various therapies, leaving few approved options. Thus, alternative treatments that are less expensive and have a favourable side effect profile remain of continued interest.

A relatively unknown area of interest in the therapy of inflammatory bowel diseases (IBD) is the role of the opioid system. Available evidence suggests that the endogenous opioid system is involved in gastrointestinal inflammation.(4, 5) Animal and human studies showed that the  $\mu$ -opioid receptor (MOR) was upregulated in subjects with IBD. In addition, they demonstrated that MOR agonists can decrease inflammation through regulation of pro inflammatory cytokine release and T-cell proliferation.(6, 7) This led to the idea of new therapeutic options for the treatment of IBD by the development of selective MOR agonists. A familiar MOR agonist is naltrexone: an orally administered narcotic antagonist that is approved for the treatment of alcohol dependence by the European Medicines Agency (EMA) and Food and Drug Administration (FDA).(8) When administered at high concentrations, for example 50 mg, this drug acts as an agonist by blocking the endogenous opioid effects. However, administered in lower doses such as 4.5 mg, it is assumed that this lower naltrexone dose results in upregulation of endogenous enkephalin and endorphin levels and has a positive modulatory effect on the MOR, thereby controlling gut inflammation.(9, 10) Thus, the use of so called low dose naltrexone (LDN) in the clinical settings has gained interest in IBD.

At the Erasmus MC, a pilot study was performed to evaluate the effect of LDN on the clinical, biochemical and cellular level in patients with IBD. In this study, patients not in remission and not responding to conventional therapy were offered to initiate LDN as a concomitant treatment. Among 47 patients that started LDN, 74.5% experienced clinical improvement and 25.5% clinical remission at week 12. A minority of the patients experienced side effects, but these were relatively mild and consisted of vivid dreams, drowsiness, and headache. LDN therapy resulted in reduced endoplasmic reticulum stress in biopsies from inflamed mucosa, and led to improved wound healing in *in vitro* models.(11) To objectively define the effect of LDN on intestinal inflammation, a randomized controlled trial with endoscopic assessment is necessary. Only via an objective assessment we can elucidate the exact role of LDN in the treatment of patients with CD.

Therefore, the aim of this study is to prospectively assess the efficacy of LDN as induction therapy in patients with active CD.



## METHODS

This protocol includes the standard protocol items recommended for interventional trials according to the Standard Protocol Items: Recommendations for Interventional Trials (SPIRIT) guidelines.<sup>(12)</sup> The most recent study protocol (Protocol version 4, June 2021) is presented in this manuscript. The date of the first enrolment was 14 January 2021.

### Study setting

This randomized, double-blinded, placebo-controlled multicentre trial is currently being performed at departments of Gastroenterology and Hepatology in the Netherlands, including both academic and non-academic centers. At this stage, 7 hospitals are participating, and we are currently expanding the number of collaborating centers. Patients that underwent a colonoscopy and seem eligible for inclusion or patients that are interested will receive information about the study via the doctor or researcher, at the clinic or by phone. Eligible patients with active CD are randomized 1:1 to receive treatment with either LDN 4.5 mg once daily or placebo, for 12 weeks. After 12 weeks patients are invited to participate in an open label exploratory extension study until week 52. Adult patients with mild to moderately active CD, defined by endoscopy with mucosal ulcers in the ileum and/or colon and a Simple Endoscopic Score-CD (SES-CD) of 3-15, who visit the outpatient clinic of the department of Gastroenterology and Hepatology of participating hospitals are eligible.<sup>(13)</sup> Clinical visits are planned at week 0, 4, 12 and if applicable week 24 and 52. Telephone consults are scheduled at week 2, 8 and if applicable week 36. See Figure 1 for the flowchart of the study design. Prior to enrolment, all patients must sign informed consent (Appendix 1).

## PARTICIPANTS

### Eligibility criteria

Patients with mild to moderately active CD, defined by endoscopy with mucosal ulcers in the ileum or colon or both, and SES-CD of 3-15, aged 18 years or older who visit the outpatient clinic of the department of Gastroenterology and Hepatology of participating hospitals are eligible. Endoscopic assessment up to 2 months prior to the start of the study is mandatory. Permitted concomitant CD therapies are: aminosalicylates, azathioprine, 6-mercaptopurine, thioguanine and methotrexate provided the dose prescribed has been stable for at least 4 weeks prior to randomization; dose must be stable for the first 10 weeks after randomization. Oral corticosteroid therapy (prednisone prescribed at a stable dose  $\leq$  30 mg/day or budesonide prescribed at a stable dose of  $\leq$  9 mg/day) must have been stable for 2 weeks prior to randomization, and tapering during the study is mandatory. The use of other investigational products, biologicals, JAK-STAT inhibitors, cyclosporine, thalidomide and tacrolimus is prohibited, and these medicines need to be stopped 12 weeks prior to the start of the study. Other exclusion criteria are opioid use, drugs and/or alcohol abuse, pregnancy or lactation, stool positive for an infectious agent, and other significant medical conditions that might interfere with the study (such as a stricture causing symptoms or fistulising disease complicated by infection).

## INTERVENTIONS

### Investigational product

In this study, the participant will be given naltrexone 4,5 mg or placebo once a day. Placebo and LDN capsules are identical in appearance. The active substance in the investigational medicinal product is naltrexone hydrochloride. Naltrexone is a derivative of noroxymorphone that is the N-cyclopropylmethyl congener of naloxone. It is a narcotic antagonist that is effective orally, and longer lasting and more potent

1  
2 than naloxone. Naltrexone (50 mg) was approved for the treatment of alcohol dependence in June 2010 by  
3 the EMA and FDA. EU-procedure number: NL/H/1151/001/DC Registration number in the Netherlands: RVG  
4 102900.  
5

### 6 **Patient reported outcomes**

7  
8 During every scheduled consult, patients are asked to fill out questionnaires online, see Table 1. This  
9 includes the Patient Reported Outcome-2 (PRO2)(14) and the Harvey Bradshaw Index (HBI)(15) for disease  
10 activity, the short Inflammatory Bowel Disease Questionnaire (SIBDQ)(16) and the 5-level EuroQol Five  
11 Dimensions Health Questionnaire (EQ5D-5L)(17) for quality of life, the Work Productivity and Activity  
12 Impairment Questionnaire (WPAI)(18) for work productivity, fatigue via The Functional Assessment of  
13 Chronic Illness Therapy – Fatigue (FACIT-F)(19) and Multidimensional Fatigue Inventory (MFI)(20) and sleep,  
14 anxiety and depression via the Patient-Reported Outcomes Measurement Information System (NIH  
15 PROMIS)(21).  
16  
17  
18

### 19 **Endoscopic assessment**

20  
21 A colonoscopy will be performed during screening (maximum of 8 weeks before the start of the study) and  
22 at the end of the induction phase at week 12. If patients are willing to participate in the open label follow-  
23 up study, an extra colonoscopy can be performed at week 52, see Figure 1. Colonoscopy allows for direct  
24 mucosal visualisation and the performance of biopsies. By using the SES-CD, activity, and severity of CD  
25 before and after treatment can be determined.  
26  
27  
28

### 29 **Serum and stool samples**

30  
31 Baseline blood and stool samples will be obtained from all participants, with a maximum of 8 weeks before  
32 the start of the therapy. During the study, blood will be checked at week 4 and 12 and every 3 months  
33 during the maintenance phase if applicable, see Table 1. Laboratory tests include: urea, creatinine, CRP,  
34 aspartate transaminase, alanine transaminase, lactate dehydrogenase, alkaline phosphatase, haemoglobin,  
35 mean corpuscular volume, thrombocytes, leukocytes. Faecal calprotectin (FC) will be collected at week 12,  
36 and if applicable at week 24 and 52. This granulocyte-derived protein is measured in the stool and is a non-  
37 invasive, cheap and extensively studied biomarker that correlates with clinical and endoscopic disease  
38 activity.(22)  
39  
40  
41

### 42 **Disease worsening criteria**

43  
44 Patients that show an increase in HBI at 2 consecutive visits can be discontinued from blinded treatment  
45 and can be offered the option to receive open-label therapy. If a subject experiences significant worsening  
46 of underlying CD, which requires any of the prohibited medications or surgical intervention at any point  
47 during the study, treatment discontinuation should be considered at investigator's discretion.  
48  
49  
50

## 51 **OUTCOMES**

52  
53 See Table 1 for the schedule of study procedures and interventions.  
54

### 55 **Primary outcome**

56  
57 The aim of this study is to prospectively assess the efficacy of LDN for the induction of remission in patients  
58 with mild to moderate active CD. The primary objective is endoscopic remission at week 12, defined as SES-  
59 CD  $\leq 2$  and an ulcerated surface subscore  $\leq 1$  in all five segments.(13)  
60

## Secondary outcomes

### *Disease activity*

- The proportion of patients in steroid free clinical remission defined as a HBI score of  $\leq 4$  and complete tapering of systemic corticosteroids and endoscopic remission at week 12.
- Response defined by a decrease in HBI of  $\geq 3$  points compared to baseline and endoscopic response defined as a reduction of SES-CD score by  $\geq 50\%$  versus baseline at week 12.
- Changes in laboratory measures of inflammation (CRP and FC) from baseline at week 12, 24 and 52.
- Proportion of patients in corticosteroid free clinical remission at week 52.
- Endoscopic remission and response at week 52.
- Response via the HBI and PRO2.

### Quality of life

- Quality of life, via the SIBDQ and EQ5D.
- Fatigue, via the FACIT-F and MFI.
- Anxiety, depression and sleep disturbance, via the PROMIS NIH.

### Healthcare costs and work

- Work productivity via the WPAI.
- Healthcare costs will be calculated and the EQ-5D utility will be used to derive a quality-adjusted life year (QALY) estimate.

## Sample size

A power analysis was performed on the primary outcome of achieving endoscopic remission. Based on previous research, it was estimated that the mucosal healing rates at week 12 would be 25% for LDN and 5% for placebo, and the dropout rate 5%. To have 85% power to detect a true difference in the primary outcome measure between placebo and LDN, 61 patients will be needed in both groups. In total, we plan to recruit 122 patients to include into the study. All statistical analyses will be performed using 2-sided tests with  $\alpha = 0.05$ .(11)

## ASSIGNMENT OF INTERVENTIONS

Eligible patients will be randomized to one of two groups (LDN or placebo) in a 1:1 ratio. The pharmacy that produced the trial medication numbered the bottles with unique package numbers, according to a randomization schedule that was generated by a statistician. The trial medication is being stored at the pharmacy of the Erasmus MC and will be sent directly to the participant after inclusion. Patient, doctor and investigator are blinded, and if unblinding is necessary, a pharmacist from the Erasmus MC pharmacy will be asked to provide the information required.

## DATA MANAGEMENT AND ANALYSIS

Data of all participating centres will be collected and entered both by participants and staff in electronic case report forms of Gemstracker, an electronic database set up for clinical trials.(23) Data will be coded, stored and monitored by certified personnel following good clinical practice guidelines. Adverse events will be registered at every visit and in case of a serious adverse event reported to the METC of the Erasmus MC.

## Statistical methods

1  
2 Demographic and patient data will be described using frequencies and percentages for categorical  
3 variables. Continuous variables will be described using mean and standard deviation, or median and  
4 interquartile range for non-normally distributed variables. Categorical variables will be compared between  
5 groups using Chi-squared test and continuous variables using the t-test or Mann-Whitney U test for non-  
6 normally distributed variables. A p-value of <0.05 will be considered statistically significant  
7  
8

9 The primary outcome endoscopic remission at week 12, will be compared between the LDN and placebo  
10 group using a chi-square test. The difference between the steroid free clinical remission between the LDN  
11 and placebo group, defined by a HBI score of  $\leq 4$  and complete tapering of systemic corticosteroids and  
12 endoscopic remission at week 12, will be measured using a chi-square test. Response, defined by a  
13 decrease in HBI of  $\geq 3$  points compared to baseline and endoscopic response defined as a reduction of SES-  
14 CD score by  $\geq 50\%$  at week 12 compared to baseline, will be analysed using a chi-square test. Proportion of  
15 patients in corticosteroid free clinical remission and endoscopic remission at week 52 will be analysed using  
16 a chi-square test as well. Changes in laboratory measures of inflammation (CRP and FC) within each group  
17 will be analysed using a paired T-test. The evolution of different patient reported outcomes over time will  
18 be analysed using mixed models.  
19  
20  
21  
22

### 23 **ETHICS AND DISSEMINATION**

24  
25 This study is approved by the METC of the Erasmus MC, Rotterdam, the Netherlands (registration number  
26 NL69149.078.19, MEC-2019-0602) on 31 January 2020. Important protocol modifications are assessed and  
27 approved by the METC, and reported to participating investigators. The LDN Crohn study has been  
28 registered at the Dutch trial registry (NL9259). Results will be published in peer-reviewed journals and  
29 presented at international conferences.  
30  
31

### 32 **PATIENT AND PUBLIC INVOLVEMENT STATEMENT**

33  
34 This study was designed in collaboration with a patient with IBD and with the Dutch Crohn's and Colitis  
35 patient organization.<sup>(24)</sup> We will engage closely with the patient organisation to communicate research  
36 findings to inform patients on the effectiveness of LDN on controlling inflammation. Patient reported  
37 outcomes are included in our study to measure the impact of the intervention on the patient's life.  
38  
39  
40  
41  
42  
43  
44  
45  
46  
47  
48  
49  
50  
51  
52  
53  
54  
55  
56  
57  
58  
59  
60

## DISCUSSION

In this double-blinded and placebo-controlled study, the effectiveness of LDN for the induction of remission of patients with mild to moderate CD is being investigated. The benefits of this therapy will be the anti-inflammatory effects, the low frequency and mild side-effects, the oral administration route, and low costs. Thereby, this study will have direct impact on the management of CD patients by determining if LDN is useful in the treatment of mild to moderate CD. If LDN is capable of inducing remission, this drug might be implemented in the treatment strategies for patients with CD.

In addition to the preliminary study of the Erasmus MC, several pilot studies have been executed that investigated the effect of LDN therapy in active IBD. An open-label pilot study in 17 patients showed a clinical response in 89% and clinical remission in 67% of the participants after 12 weeks of LDN therapy. Sleep disturbance was the most common side effect, occurring in seven patients.(25) The same research group conducted a subsequent randomized, placebo-controlled, double blind study in 34 IBD patients, and found a response rate of 88% in the LDN group versus 40% in the placebo group after 12 weeks of therapy. In addition, 33% of the participants achieved endoscopic remission in the LDN group vs 8% in placebo group.(26) Furthermore, LDN appeared safe and was well tolerated when investigated in a pilot RCT with 12 paediatric IBD patients. They showed a significant reduction in PCDAI scores after 8 weeks, with 25% of patients achieving clinical remission and 67% showing clinical improvement in the LDN group.(27) The authors from The Cochrane Database concluded in their review that there is currently insufficient evidence to allow any firm conclusions regarding the efficacy and safety of LDN, and further randomized controlled trials are required.(28)

A quasi-experimental before-and-after study from Norway investigated whether initiation of LDN therapy by IBD patients resulted in changes in the use of concomitant IBD medication. The investigators identified 582 IBD patients that had at least one LDN prescription recorded in the Norwegian Prescription Database in 2013. Among the 256 patients that became persistent LDN users, there were reductions in number of users of various examined medicines. In addition, the reductions in number of users were larger in persistent LDN users compared to less frequent users for different IBD drugs. This may suggest that LDN use is associated with the use of less concurrent IBD medication in this group of patients, leading to a reduction in costs and in a lowered risk of adverse events.(29)

A strength of this study is the double-blinded and placebo-controlled design, that provides the strongest possible evidence of causation. Further, the primary outcome defined by mucosal healing, assessed by a colonoscopy before and after induction therapy, is the gold standard for evaluating disease activity. In addition, biochemical measures and self-reported disease activity are assessed to follow-up response and relapse over time. There are no evident limitations in the design of the trial, but the anti-inflammatory mechanism of action of LDN is not yet fully understood.

The efficacy signals demonstrated in the (pilot) clinical trials, as well as the beneficial findings in nonclinical models of disease and the overall safety and tolerability of LDN that have been elucidated to date, result in a favourable benefit-risk profile for this agent in continued investigation as a treatment for CD. Therefore, this randomized, double-blinded, placebo-controlled multicentre trial will provide important insights into the anti-inflammatory effects of LDN in patients with mild to moderate active CD. If LDN is able to induce remission, this drug might be regarded as a first line therapy in the treatment of active CD because of the oral administration, affordability and anticipated low frequency of side effects.

## AUTHORS' CONTRIBUTIONS

CW conceived the idea for the study, designed the protocol and supervises study execution. ML designed the protocol and drafted the manuscript. EP designed the protocol, executes the study and drafted the manuscript. All authors provided critical revision of the manuscript for important intellectual content and approved the final draft of the protocol for submission.

## ACKNOWLEDGEMENT

We thank Dr. A.C. de Vries, Dr. R.L. West, Drs. S. Nikkessen, T. Markus, Dr. E. Ista for their help in designing the study. We want to thank prof. dr. E.W. Steyerberg for the statistical support.

## FUNDING SOURCES

The investigator initiated LDN Crohn study is supported by the Netherlands Organisation for Health Research and Development (ZonMw, Good use of medication, grant number 848082001). ZonMw is part of the Netherlands Organisation for Scientific Research (NWO).

## COMPETING INTEREST

Professor CJ van der Woude has served on advisory boards for Abbvie, Takeda, Pfizer and Celltrion. She is supported by research funding from ZonMW, Tramedico, and Pfizer.

## PATIENT AND PUBLIC INVOLVEMENT

Patients and the patient organisation were involved in the design of this research. Refer to the Methods section for further details.

## PATIENT CONSENT FOR PUBLICATION

Not required.

## DATA AVAILABILITY STATEMENT

The dataset generated during the LDN Crohn study is available on reasonable request.

## REFERENCES

1. Torres J, Mehandru S, Colombel JF, Peyrin-Biroulet L. Crohn's disease. *Lancet*. 2017;389(10080):1741-55.
2. Torres J, Bonovas S, Doherty G, Kucharzik T, Gisbert JP, Raine T, et al. ECCO Guidelines on Therapeutics in Crohn's Disease: Medical Treatment. *J Crohns Colitis*. 2020;14(1):4-22.
3. van Linschoten RCA, Visser E, Niehot CD, van der Woude CJ, Hazelzet JA, van Noord D, et al. Systematic review: societal cost of illness of inflammatory bowel disease is increasing due to biologics and varies between continents. *Aliment Pharmacol Ther*. 2021;54(3):234-48.
4. Mani AR, Moore KP. New insights into the role of endogenous opioids in the pathogenesis of gastrointestinal and liver disease. *Gut*. 2009;58(7):893-5.
5. Sobczak M, Sałaga M, Storr MA, Fichna J. Physiology, signaling, and pharmacology of opioid receptors and their ligands in the gastrointestinal tract: current concepts and future perspectives. *J Gastroenterol*. 2014;49(1):24-45.
6. Philippe D, Chakass D, Thuru X, Zerbib P, Tsicopoulos A, Geboes K, et al. Mu opioid receptor expression is increased in inflammatory bowel diseases: implications for homeostatic intestinal inflammation. *Gut*. 2006;55(6):815-23.
7. Philippe D, Dubuquoy L, Groux H, Brun V, Chuoï-Mariot MT, Gaveriaux-Ruff C, et al. Anti-inflammatory properties of the mu opioid receptor support its use in the treatment of colon inflammation. *J Clin Invest*. 2003;111(9):1329-38.
8. Agency EM. Guideline on the development of medicinal products for the treatment of alcohol dependence: European Medicines Agency; [updated 18 February 2010. Available from: [https://www.ema.europa.eu/en/documents/scientific-guideline/guideline-development-medicinal-products-treatment-alcohol-dependence\\_en.pdf](https://www.ema.europa.eu/en/documents/scientific-guideline/guideline-development-medicinal-products-treatment-alcohol-dependence_en.pdf).
9. Matters GL, Harms JF, McGovern C, Fitzpatrick L, Parikh A, Nilo N, et al. The opioid antagonist naltrexone improves murine inflammatory bowel disease. *J Immunotoxicol*. 2008;5(2):179-87.
10. Tawfik DI, Osman AS, Tolba HM, Khatlab A, Abdel-Salam LO, Kamel MM. Evaluation of therapeutic effect of low dose naltrexone in experimentally-induced Crohn's disease in rats. *Neuropeptides*. 2016;59:39-45.
11. Lie M, van der Giessen J, Fuhler GM, de Lima A, Peppelenbosch MP, van der Ent C, et al. Low dose Naltrexone for induction of remission in inflammatory bowel disease patients. *J Transl Med*. 2018;16(1):55.
12. SPIRIT 2013 Statement: Defining Standard Protocol Items for Clinical Trials. *Annals of Internal Medicine*. 2013;158(3):200-7.
13. Daperno M, D'Haens G, Van Assche G, Baert F, Bulois P, Maunoury V, et al. Development and validation of a new, simplified endoscopic activity score for Crohn's disease: the SES-CD. *Gastrointest Endosc*. 2004;60(4):505-12.
14. Bojic D, Bodger K, Travis S. Patient Reported Outcome Measures (PROMs) in Inflammatory Bowel Disease: New Data. *J Crohns Colitis*. 2017;11(suppl\_2):S576-S85.
15. Harvey RF, Bradshaw JM. A simple index of Crohn's-disease activity. *Lancet*. 1980;1(8167):514.
16. Irvine EJ, Zhou Q, Thompson AK. The Short Inflammatory Bowel Disease Questionnaire: a quality of life instrument for community physicians managing inflammatory bowel disease. CCRPT Investigators. Canadian Crohn's Relapse Prevention Trial. *Am J Gastroenterol*. 1996;91(8):1571-8.
17. EuroQol G. EuroQol--a new facility for the measurement of health-related quality of life. *Health Policy*. 1990;16(3):199-208.
18. Reilly MC, Zbrozek AS, Dukes EM. The validity and reproducibility of a work productivity and activity impairment instrument. *Pharmacoeconomics*. 1993;4(5):353-65.
19. Yellen SB, Cella DF, Webster K, Blendowski C, Kaplan E. Measuring fatigue and other anemia-related symptoms with the Functional Assessment of Cancer Therapy (FACT) measurement system. *J Pain Symptom Manage*. 1997;13(2):63-74.
20. Smets EM, Garssen B, Bonke B, De Haes JC. The Multidimensional Fatigue Inventory (MFI) psychometric qualities of an instrument to assess fatigue. *J Psychosom Res*. 1995;39(3):315-25.
21. Terwee CB, Roorda LD, de Vet HC, Dekker J, Westhovens R, van Leeuwen J, et al. Dutch-Flemish translation of 17 item banks from the patient-reported outcomes measurement information system (PROMIS). *Qual Life Res*. 2014;23(6):1733-41.

- 1  
2  
3  
4  
5  
6  
7  
8  
9  
10  
11  
12  
13  
14  
15  
16  
17  
18  
19  
20  
21  
22  
23  
24  
25  
26  
27  
28  
29  
30  
31  
32  
33  
34  
35  
36  
37  
38  
39  
40  
41  
42  
43  
44  
45  
46  
47  
48  
49  
50  
51  
52  
53  
54  
55  
56  
57  
58  
59  
60
22. Turner D, Ricciuto A, Lewis A, D'Amico F, Dhaliwal J, Griffiths AM, et al. STRIDE-II: An Update on the Selecting Therapeutic Targets in Inflammatory Bowel Disease (STRIDE) Initiative of the International Organization for the Study of IBD (IOIBD): Determining Therapeutic Goals for Treat-to-Target strategies in IBD. *Gastroenterology*. 2021;160(5):1570-83.
23. GGeneric Medical Survey Tracker [updated 03 December 2020. Available from: <https://gemstracker.org/wiki/doku.php?id=start>.
24. Crohn-colitis: Crohn & Colitis NL; [Available from: <https://www.crohn-colitis.nl/>].
25. Smith JP, Stock H, Bingaman S, Mauger D, Rogosnitzky M, Zagon IS. Low-dose naltrexone therapy improves active Crohn's disease. *Am J Gastroenterol*. 2007;102(4):820-8.
26. Smith JP, Bingaman SI, Ruggiero F, Mauger DT, Mukherjee A, McGovern CO, et al. Therapy with the opioid antagonist naltrexone promotes mucosal healing in active Crohn's disease: a randomized placebo-controlled trial. *Dig Dis Sci*. 2011;56(7):2088-97.
27. Smith JP, Field D, Bingaman SI, Evans R, Mauger DT. Safety and tolerability of low-dose naltrexone therapy in children with moderate to severe Crohn's disease: a pilot study. *J Clin Gastroenterol*. 2013;47(4):339-45.
28. Parker CE, Nguyen TM, Segal D, MacDonald JK, Chande N. Low dose naltrexone for induction of remission in Crohn's disease. *Cochrane Database Syst Rev*. 2018;4(4):CD010410.
29. Raknes G, Simonsen P, Småbrekke L. The Effect of Low-Dose Naltrexone on Medication in Inflammatory Bowel Disease: A Quasi Experimental Before-and-After Prescription Database Study. *J Crohns Colitis*. 2018;12(6):677-86.



1  
2 Figure legends  
3

4 Figure 1. Flowchart of the study design, with endoscopy as primary outcome at week 12. FC: fecal  
5 calprotectine, LDN: low dose naltrexone, T: telephone consult, C: clinical consults, W: week .  
6  
7  
8  
9  
10  
11  
12  
13  
14  
15  
16  
17  
18  
19  
20  
21  
22  
23  
24  
25  
26  
27  
28  
29  
30  
31  
32  
33  
34  
35  
36  
37  
38  
39  
40  
41  
42  
43  
44  
45  
46  
47  
48  
49  
50  
51  
52  
53  
54  
55  
56  
57  
58  
59  
60

For peer review only

Table 1. Schedule of study procedures, interventions and assessments.

|                                                 | Screening | Induction phase |        |         |         |         | Maintenance phase |         |         |
|-------------------------------------------------|-----------|-----------------|--------|---------|---------|---------|-------------------|---------|---------|
| Procedures                                      |           | Week 0          | Week 2 | Week 4* | Week 8* | Week 12 | Week 24           | Week 36 | Week 52 |
| Clinical visit                                  | (X)       | X               |        | X       |         | X       | X                 |         | X       |
| Telephone consult                               | (X)       |                 | X      |         | X       |         |                   | X       |         |
| Eligibility screening                           | X         |                 |        |         |         |         |                   |         |         |
| Informed consent                                | X         |                 |        |         |         |         |                   |         |         |
| Colonoscopy                                     | X         |                 |        |         |         | X       |                   |         | (X)     |
| Laboratory tests*                               | X         |                 |        | X       |         | X       | X                 |         | X       |
| Feecal calprotectin                             | X         |                 |        |         |         | X       | X                 |         | X       |
| Baseline information                            |           | X               |        |         |         |         |                   |         |         |
| Concomitant medication                          |           | X               | X      | X       | X       | X       | X                 | X       | X       |
| HBI, PRO2                                       |           | X               | X      | X       | X       | X       | X                 | X       | X       |
| SIBDQ, EQ-5D-5L, FACIT-F, MFI, NIH-PROMIS, WPAI |           | X               |        | X       |         | X       | X                 |         | X       |
| Adverse events                                  |           |                 | X      | X       | X       | X       | X                 | X       | X       |

(X): optional, HBI: Harvey Bradshaw Index, PRO2: Patient Reported Outcome-2 (PRO2), SIBDQ: short Inflammatory Bowel Disease Questionnaire. EQ5D-5L: 5-level EuroQol Five Dimensions Health Questionnaire, FACIT-F: Functional Assessment of Chronic Illness Therapy – Fatigue (FACIT-F), MFI: Multidimensional Fatigue Inventory, NIH PROMIS: sleep, anxiety and depression via the Patient-Reported Outcomes Measurement Information System, WPAI: Work Productivity and Activity Impairment Questionnaire.

\*Laboratory tests include: urea, creatinine, CRP, aspartate transaminase, alanine transaminase, lactate dehydrogenase, alkaline phosphatase, haemoglobin, mean corpuscular volume, thrombocytes, leukocytes.



# Proefpersoneninformatie voor deelname aan medisch-wetenschappelijk onderzoek

## Naltrexon in lage dosering voor het in remissie brengen van de ziekte van Crohn

Officiële titel: Lage dosering Naltrexon voor inductie van remissie bij patiënten met een milde tot matige vorm van de ziekte van Crohn, waarbij de standaardtherapie onvoldoende werkt of teveel bijwerkingen geeft.

### Inleiding

Geachte heer/mevrouw,

Wij vragen u vriendelijk om mee te doen aan een medisch-wetenschappelijk onderzoek. Meedoen is vrijwillig. Om deel te nemen aan het onderzoek is wel uw schriftelijke toestemming nodig. U ontvangt deze brief omdat u de ziekte van Crohn heeft waarbij u onvoldoende effect ondervindt van uw huidige medicijnen of teveel last heeft van bijwerkingen. Voordat u beslist of u wil meedoen aan dit onderzoek, krijgt u uitleg over wat het onderzoek inhoudt. Lees deze informatie rustig door en vraag de onderzoeker uitleg als u vragen heeft. U kunt ook de onafhankelijk deskundige, die aan het eind van deze brief genoemd wordt, om aanvullende informatie vragen. Zie bijlage A voor contactgegevens. U kunt er ook over praten met uw partner, vrienden of familie. Verdere informatie over meedoen aan zo'n onderzoek staat in de bijgevoegde brochure 'Medisch-wetenschappelijk onderzoek'.

### 1. Algemene informatie

Dit onderzoek is opgezet door de afdeling Maag-, Darm- en Leverziekten van het Erasmus Medisch Centrum en wordt gedaan door artsen in meer dan 10 verschillende ziekenhuizen. Voor dit onderzoek zijn in totaal ruim 122 deelnemers nodig. De medisch-ethische toetsingscommissie van het Erasmus Medisch Centrum heeft dit onderzoek goedgekeurd. Algemene informatie over de toetsing van onderzoek vindt u in de brochure 'Medisch-wetenschappelijk onderzoek'.

### 2. Doel van het onderzoek

Het doel van het onderzoek is uitzoeken of een lage dosis naltrexon (LDN) de ziekte van Crohn in remissie kan brengen wanneer de huidige behandeling onvoldoende effect heeft of teveel bijwerkingen geeft. Tevens kijken we of het middel effect heeft op moeheid en stemming. Het is de bedoeling om de gevonden resultaten te publiceren.

### 3. Achtergrond van het onderzoek

De ziekte van Crohn behoort samen met colitis ulcerosa tot de groep Inflammatoire darmziekten (IBD). Deze ontstekingsziekten van de darm gaan gepaard met afwisselend rustige en actieve ziekteperiodes. De behandeling bestaat onder andere uit medicatie om de symptomen te verminderen en de ontsteking tot rust te brengen. De huidige behandeling van een patiënt met een milde ziekte van Crohn (CD) start in het algemeen met corticosteroïden. Hierna worden vaak als onderhoudsmedicatie immunosuppressiva gegeven, meestal thiopurines. Bij een groot deel van de patiënten is de ziekte met deze medicijnen goed onder controle. Echter bij een gedeelte van de patiënten is een vervolg stap naar biologische medicatie nodig.

Uit enkele kleine onderzoeken komt naar voren dat het medicijn Naltrexon (LDN), in lage doseringen, mogelijk ook gebruikt kan worden om de ziekte rustig te houden. Naltrexon heeft een gunstiger bijwerkingen profiel dan de biologische medicatie. Deze studie vergelijkt de werking van Naltrexon in lage dosering met een placebo, voor het in remissie brengen van de ziekte van Crohn. Tevens wordt er gekeken of Naltrexon effect heeft op moeheid en stemming. Het onderzoek wordt uitgevoerd in meer dan 10 ziekenhuizen in Nederland.

### 4. Wat meedoen inhoudt

Als u meedoet duurt dat 3 maanden. Indien u hierna door wil gaan met het onderzoek om te kijken of Naltrexon ook werkt als onderhoudsmiddel duurt het tot maximaal een jaar.

#### Geschiktheidsonderzoek

Eerst bepalen we of u mee kunt doen aan het onderzoek. Uw behandelend arts meet de ziekteactiviteit van uw darmziekte door te vragen naar uw klachten en een onderzoek in de ontlasting te doen. Tevens bekijkt hij de darm vanbinnen door middel van een coloscopie. Ook vragen we naar uw medische voorgeschiedenis en medicijngebruik.

#### Opzet van het onderzoek

Om het effect van lage dosering Naltrexon optimaal te onderzoeken wordt het vergeleken met het gebruik van een niet werkzaam middel, ook wel placebo. U wordt gerandomiseerd voor één van beide middelen, wat inhoudt dat het door loting wordt bepaald welk middel u gaat gebruiken. U en de onderzoekers weten tijdens het onderzoek niet welk middel u gebruikt.

#### Bezoeken en metingen

Voor het onderzoek is het nodig dat u meerdere keren naar het ziekenhuis komt, namelijk 2 keer op (ongeveer) de volgende momenten: week 4 en 12. Indien u ervoor kiest ook in week 24 en 52.

Tijdens de ziekenhuisbezoeken zal het volgende gebeuren:

- Bloedafname – elk poliklinisch bezoek, hierin meten we de bloedcellen en ontstekingswaarden

## Proefpersoneninformatie

- Inleveren ontlasting– poliklinisch bezoek week 12, hierin meten we ontstekingswaarden
- Vragenlijsten invullen – poliklinisch bezoek, hierbij krijgt u vragen over uw klachten en kwaliteit van leven. Het invullen kost ongeveer 20 minuten.
- Coloscopie – dit gebeurt voorafgaand aan de studie, in week 12 en indien u ervoor kiest in week 52.

Tijdens 2 telefonische afspraken vragen wij of u last heeft van bijwerkingen en nemen we een korte vragenlijst af om de ziekte activiteit te scoren. Dit duurt 10 min.

**Anders dan bij gebruikelijke zorg**

Normaal komt u misschien één keer in de 3 of 6 maanden bij uw arts voor controle van uw Crohn. De bezoeken die bij dit onderzoek horen, komen in plaats van normale bezoeken. Vanzelfsprekend geeft u het zelf aan wanneer het niet goed met u gaat, zodat een extra afspraak gepland zal worden.

In bijlage B vindt u alle informatie die u nodig heeft over de onderzoeksbehandeling en de procedures van het onderzoek.

**5. Wat wordt er van u verwacht**

Om het onderzoek goed te laten verlopen en voor uw eigen veiligheid, is het belangrijk dat u zich aan de volgende afspraken houdt. Naast de hieronder genoemde, kunnen er nog andere regels zijn die uw onderzoekarts met u zal doornemen;

De afspraken zijn dat u:

- De medicijnen inneemt.
- Afspraken voor bezoeken nakomt;
- Niet ook nog aan een ander medisch-wetenschappelijk onderzoek meedoet;
- Alles vertelt aan uw onderzoekarts wat u weet over uw gezondheid en de medicijnen die u nu inneemt of mee begint tijdens het onderzoek. Bepaalde geneesmiddelen mogen niet gebruikt worden tijdens uw deelname aan het onderzoek. Als u dat niet doet, brengt u mogelijk uw eigen gezondheid in gevaar;
- Niet zwanger bent, wordt of borstvoeding geeft tijdens dit onderzoek. Overleg met uw arts over geschikte voorbehoedsmiddelen;
- De behandeling dient te onderbreken in overleg met u en de begeleidend onderzoekarts. Dit kan gebeuren als u symptomen heeft van een infectie, afwijkende bloedresultaten of een operatie moet ondergaan. Geef dit dan ook zo snel mogelijk door aan uw arts;

Het is belangrijk dat u contact opneemt met de onderzoeker:

- voordat u andere geneesmiddelen gaat gebruiken. Ook als dat homeopathische geneesmiddelen, natuurgeneesmiddelen, vitaminen en/of geneesmiddelen van de drogist zijn;
- als u in een ziekenhuis wordt opgenomen of behandeld;

## Proefpersoneninformatie

- als u plotseling gezondheidsklachten krijgt;
- als u zwanger wordt;
- als u niet meer wilt meedoen aan het onderzoek;
- als uw contactgegevens wijzigen.

## 6. Mogelijke risico's van deelname aan dit onderzoek

Elk geneesmiddel kan bijwerkingen geven of onvoorziene reacties veroorzaken. Bovendien kan iedere patiënt anders reageren op dezelfde dosering van het hetzelfde geneesmiddel. Het is mogelijk dat het geneesmiddel dat u gebruikt uw aandoening, de ziekte van Crohn, niet doeltreffend onder controle brengt.

### Bijwerkingen

Lees aandachtig bijlage C door met meer uitgebreide informatie over bijwerkingen en risico's. Doet u mee aan het onderzoek? Dan krijgt u de bijsluiter mee met het middel.

### Bloedafnames

Bloedafnames kunnen pijn doen of een bloeditstorting geven. Alles bij elkaar nemen we maximaal 4 buisjes bloed af tijdens de eerste 3 maanden van de studie, wat neerkomt op 34 ml bloed in totaal. Deze hoeveelheid geeft bij volwassenen geen problemen. Ter vergelijking: bij de bloedbank wordt 500 ml bloed per keer afgenomen. U kunt een gevoel van flauwte ervaren tijdens afname. Tijdens een bloedafname kan een prikaccident optreden, een verwonding met een naald waarbij het mogelijk is dat de persoon besmet raakt met een bloed overdraagbare aandoening zoals een virus. Ook een infectie is een mogelijk risico.

### Zwangerschap

Vrouwen die zwanger zijn of borstvoeding geven, kunnen niet meedoen aan dit onderzoek. Ook mogen vrouwen niet zwanger worden tijdens het onderzoek. De onderzoeker kan met u over geschikte voorbehoedsmiddelen praten. Vertel het uw arts onmiddellijk als u zwanger raakt.

## 7. Mogelijke voor- en nadelen

Het is belangrijk dat u de mogelijke voor- en nadelen goed afweegt voordat u besluit mee te doen. Naltrexon kan de ontstekingsactiviteit in de darmen verminderen, maar zeker is dat niet. Ieder individu reageert verschillend.

Nadelen van meedoen aan het onderzoek kunnen zijn:

- mogelijke bijwerkingen;
- mogelijke ongemakken van de metingen in het onderzoek.

## Proefpersoneninformatie

Deelname aan het onderzoek betekent ook:

- dat u extra tijd kwijt bent;
- dat extra testen afgenomen worden;
- dat u afspraken heeft waaraan u zich moet houden.

Al deze zaken zijn hiervoor onder punt 4, 5 en 6 beschreven.

## 8. Als u niet wilt meedoen of wilt stoppen met het onderzoek

U beslist zelf of u meedoet aan het onderzoek. Deelname is vrijwillig. Als u niet wil meedoen, wordt u op de gebruikelijke manier behandeld voor uw ziekte van Crohn. Uw arts kan u meer vertellen over de behandelingsmogelijkheden die er zijn en de voor- en nadelen daarvan.

Als u wel meedoet, kunt u zich altijd bedenken en toch stoppen, ook tijdens het onderzoek.

U wordt dan weer op de gebruikelijke manier behandeld voor uw ziekte van Crohn. U hoeft niet te zeggen waarom u stopt. Wel moet u dit direct melden aan de onderzoeker. De gegevens die tot dat moment zijn verzameld, worden gebruikt voor het onderzoek.

Als er nieuwe informatie over het onderzoek is die belangrijk voor u is, laat de onderzoeker dit aan u weten. U wordt dan gevraagd of u blijft meedoen.

## 9. Einde van het onderzoek

Uw deelname aan het onderzoek stopt als

- alle bezoeken volgens het schema (bijlage B) zijn voltooid;
- het einde van het hele onderzoek is bereikt;
- u zelf kiest om te stoppen;
- u zwanger wordt;
- de onderzoeker het beter voor u vindt om te stoppen;
- de overheid of de beoordelende medisch-ethische toetsingscommissie, besluit om het onderzoek te stoppen.

Het hele onderzoek is afgelopen als alle deelnemers klaar zijn. De medicatie die u gebruikt heeft bij het onderzoek, is ook beschikbaar na afloop van het onderzoek aangezien het om in Nederland geregistreerde medicijnen gaat. De onderzoeker zal met u praten over de mogelijkheden voor verdere medische zorg.

Na het verwerken van alle gegevens informeert de onderzoeker u over de belangrijkste uitkomsten van het onderzoek. Dit gebeurt ongeveer 2 jaar na uw deelname.

## 10. Gebruik en bewaren van uw gegevens en lichaamsmateriaal

Voor dit onderzoek worden uw persoonsgegevens en lichaamsmateriaal verzameld, gebruikt en bewaard. Het gaat om gegevens zoals uw naam, geboortedatum en om gegevens over uw gezondheid waarvoor we uw elektronisch patiëntendossier inzien.



## Proefpersoneninformatie

Voor dit onderzoek is bloed en ontlasting nodig. Het verzamelen, gebruiken en bewaren van uw gegevens en uw lichaamsmateriaal is nodig om de vragen die in dit onderzoek worden gesteld te kunnen beantwoorden en de resultaten te kunnen publiceren. Wij vragen voor het gebruik van uw gegevens en lichaamsmateriaal uw toestemming.

### **Vertrouwelijkheid van uw gegevens en lichaamsmateriaal**

Om uw privacy te beschermen krijgen uw gegevens en uw lichaamsmateriaal een code. Uw naam en andere gegevens die u direct kunnen identificeren worden daarbij weggelaten. Alleen met de sleutel van de code zijn gegevens tot u te herleiden. De sleutel van de code blijft veilig opgeborgen in de lokale onderzoeksinstelling. De gegevens en lichaamsmateriaal die naar de onderzoeker worden gestuurd bevatten alleen de code, maar niet uw naam of andere gegevens waarmee u kunt worden geïdentificeerd. Ook in rapporten en publicaties over het onderzoek zijn de gegevens niet tot u te herleiden. Indien uw ziekenhuis gebruik maakt van het verzenden van studiemedicatie naar uw huisadres, worden uw naam en adresgegevens wel doorgegeven aan de apotheek van het Erasmus MC door middel van het voorgeschreven recept. U kunt hiervoor akkoord geven op het toestemmingsformulier.

### **Toegang tot uw gegevens voor controle**

De onderzoekers kunnen op de onderzoekslocatie toegang krijgen tot al uw gegevens. Ook tot de gegevens zonder code. Dit is nodig om te kunnen controleren of het onderzoek goed en betrouwbaar is uitgevoerd. Personen die ter controle inzage krijgen in uw gegevens zijn de commissie die de veiligheid van het onderzoek in de gaten houdt, een monitor die door de onderzoeker is ingehuurd en de Inspectie Gezondheidszorg en Jeugd. Zij houden uw gegevens geheim. Wij vragen u voor deze inzage toestemming te geven.

### **Bewaartermijn gegevens en lichaamsmateriaal voor dit onderzoek**

Uw gegevens moeten 15 jaar worden bewaard op de onderzoekslocatie na het beëindigen van de studie. Het wordt bewaard om daarop in de loop van dit onderzoek nog nieuwe bepalingen te kunnen doen die te maken hebben met dit onderzoek.

### **Bewaren en gebruik van gegevens en lichaamsmateriaal voor ander onderzoek**

Uw gegevens en lichaamsmateriaal kunnen na afloop van dit onderzoek ook nog van belang zijn voor ander wetenschappelijk onderzoek op het gebied van de ziekte van Crohn. U kunt op het toestemmingsformulier aangeven of u hier wel of niet mee instemt. Indien u hier niet mee instemt, kunt u gewoon deelnemen aan het huidige onderzoek.

### **Informatie over onverwachte bevindingen**

Tijdens dit onderzoek kan er bij toeval iets gevonden worden dat niet van belang is voor het onderzoek maar wel voor u. Als dit belangrijk is voor uw gezondheid, dan zult u op de hoogte worden gesteld door uw behandelend arts of de arts-onderzoeker. U kunt dan met uw huisarts of specialist bespreken wat er gedaan moet worden. Ook hiervoor geeft u toestemming.

Proefpersoneninformatie

### **Intrekken toestemming**

U kunt uw toestemming voor gebruik van uw persoonsgegevens altijd weer intrekken. Dit geldt voor dit onderzoek en ook voor het bewaren en het gebruik voor het toekomstige onderzoek. De onderzoeksgegevens die zijn verzameld tot het moment dat u uw toestemming intrekt worden nog wel gebruikt in het onderzoek. Uw lichaamsmateriaal wordt na intrekking van uw toestemming vernietigd. Als er al metingen met dat lichaamsmateriaal zijn gedaan, dan worden die gegevens nog wel gebruikt.

### **Meer informatie over uw rechten bij verwerking van gegevens**

Voor algemene informatie over uw rechten bij verwerking van uw persoonsgegevens kunt u de website van de Autoriteit Persoonsgegevens raadplegen: [www.erasmusmc.nl/cs-patientenzorg/372137/379076/bescherming.persoonsgegevens](http://www.erasmusmc.nl/cs-patientenzorg/372137/379076/bescherming.persoonsgegevens)

Bij vragen over uw rechten kunt u contact opnemen met de verantwoordelijke voor de verwerking van uw persoonsgegevens. Voor dit onderzoek is dat: *Erasmus Medisch Centrum*. Zie bijlage A voor contactgegevens.

Bij vragen of klachten over de verwerking van uw persoonsgegevens raden we u aan eerst contact op te nemen met de onderzoekslocatie. U kunt ook contact opnemen met de Functionaris voor de Gegevensbescherming van de instelling of de Autoriteit Persoonsgegevens, tevens opgenomen in bijlage A.

### **Registratie van het onderzoek**

Informatie over dit onderzoek is ook opgenomen in een overzicht van medisch-wetenschappelijke onderzoeken ([www.trialregister.nl](http://www.trialregister.nl)). Op deze site zijn geen gegevens opgenomen die naar u herleidbaar zijn. Na het onderzoek kan de website een samenvatting van de resultaten van dit onderzoek tonen.

## **11. Verzekering voor proefpersonen**

Voor iedereen die meedoet aan dit onderzoek is een verzekering afgesloten. De verzekering dekt schade door het onderzoek. Niet alle schade is gedekt. In bijlage D vindt u meer informatie over de verzekering en de uitzonderingen. Daar staat ook aan wie u schade kunt melden.

## **12. Informeren huisarts, behandelend specialist en apotheker**

Wij laten uw huisarts weten dat u meedoet aan het onderzoek. Het is ook mogelijk dat wij andere medisch specialisten waarbij u onder behandeling bent informeren over uw deelname aan dit onderzoek indien nodig. Dit is voor uw eigen veiligheid. Als u dit niet goed vindt, kunt u niet meedoen aan dit onderzoek. Als u geen huisarts heeft, kunt u niet deelnemen aan het onderzoek.

Proefpersoneninformatie

### 13. Vergoeding voor meedoen

De studiemedicatie, extra testen en behandeling voor het onderzoek kosten u niets. U wordt niet betaald voor het meedoen aan dit onderzoek. Bezoeken aan een arts, andere behandelingen of tests die geen deel uitmaken van dit onderzoek worden niet betaald.

### 14. Heeft u vragen?

Bij vragen kunt u contact opnemen met de onderzoeker. Voor onafhankelijk advies over meedoen aan dit onderzoek kunt u terecht bij de onafhankelijke arts. Hij weet veel over het onderzoek, maar heeft niets te maken met dit onderzoek.

Indien u klachten heeft over het onderzoek, kunt u dit bespreken met de onderzoeker of uw behandelend arts. Wilt u dit liever niet, dan kunt u zich wenden tot de klachtenfunctionaris/klachtencommissie.

Alle gegevens vindt u in bijlage A: Contactgegevens.

### 15. Ondertekening toestemmingsformulier

Wanneer u voldoende bedenktijd heeft gehad, wordt u gevraagd te beslissen over deelname aan dit onderzoek. Indien u toestemming geeft, zullen wij u vragen deze op de bijbehorende toestemmingsverklaring schriftelijk te bevestigen. Door uw schriftelijke toestemming geeft u aan dat u de informatie heeft begrepen en instemt met deelname aan het onderzoek.

Zowel uzelf als de onderzoeker ontvangen een getekende versie van deze toestemmingsverklaring.

Dank voor uw aandacht.

Proefpersoneninformatie

## 16. Bijlagen bij deze informatie

- A. Contactgegevens
- B. Onderzoeks- en behandelingsprocedures
- C. Bijwerkingen en risico's
- D. Informatie over de verzekering
- E. Toestemmingsformulier proefpersoon
- F. Brochure 'Medisch-wetenschappelijk onderzoek. Algemene informatie voor de proefpersoon' (2017)

For peer review only

Proefpersoneninformatie

## Bijlage A: Contactgegevens Erasmus MC

Als u vragen hebt over uw deelname aan dit onderzoek of uw rechten als deelnemer aan een onderzoek, of als u problemen of klachten heeft betreffende deelname aan het onderzoek, kunt u contact opnemen met de onderzoeksarts.

### Arts-onderzoeker:

drs. E. Paulides, Afdeling Maag-, Darm- en Leverziekten

Email adres: [e.paulides@erasmusmc.nl](mailto:e.paulides@erasmusmc.nl)

Hoofdonderzoeker: professor dr C.J. van der Woude. U kunt haar bereiken via arts-onderzoeker E. Paulides of via het secretariaat 010 7031693.

Centraal nummer Erasmus Medisch Centrum.

Telefoonnummer: 010 - 704 07 04

### Onafhankelijk deskundige

Als u zich zorgen maakt over uw deelname, kunt u een persoon raadplegen die niet betrokken is bij het onderzoek maar wel deskundige is op het gebied van dit onderzoek.

Dr. R.J. de Knecht, telefoonnummer secretaresse: 010 - 7035942

### Klachten

Als u niet tevreden bent over het onderzoek, kunt u terecht bij de onafhankelijke klachtencommissie van het Erasmus MC.

Telefoonnummer: 010 – 703 31 98

### Bescherming persoonsgegevens

Heeft u vragen of opmerkingen over de bescherming van uw privacy?

Neem dan contact op met de functionaris gegevensbescherming (FG) van het Erasmus MC

<https://www.erasmusmc.nl/nl-nl/patientenzorg/privacy>

E-mail [functionaris.gegevensbescherming@erasmusmc.nl](mailto:functionaris.gegevensbescherming@erasmusmc.nl)

Telefoonnummer: 010 – 703 49 86

## Bijlage B: Onderzoeksbehandeling en –procedures

### Inductie- en onderhoudsbehandeling

De behandeling tijdens de eerste 12 weken wordt de 'inductiebehandeling' genoemd. Het doel van de inductiebehandeling is de ontsteking in de darm tot rust te brengen. Daarna start de onderhoudsbehandeling, met als doel het voorkomen van nieuwe opvlammingen van uw ziekte van Crohn.

#### Week 0 t-m 12: inductiebehandeling

- Naltrexon 4.5 mg éénmaal daags of placebo. U en de onderzoekers weten niet welk middel u gedurende deze periode gebruikt.
- Als u corticosteroiden gebruikt worden deze rustig afgebouwd.

#### Week 12 t-m 52: onderhoudsbehandeling

- U kunt na 12 weken kiezen om het medicijn Naltrexon te gebruiken tot week 52, om de effecten op langere termijn te onderzoeken. U en de onderzoekers weten dan tijdens deze periode wel dat u het middel Naltrexon gebruikt. Wat u tijdens de eerste 12 weken heeft gebruikt blijft onbekend.

Als iets voorvalt waardoor de volledige dosis niet kan worden ingenomen of als u vragen of zorgen heeft over het geneesmiddel, neem dan onmiddellijk contact op met uw onderzoekscentrum voor verdere instructies.

| Bezoeken of metingen                    | Beschrijving                                                                                                                                             |
|-----------------------------------------|----------------------------------------------------------------------------------------------------------------------------------------------------------|
| Lichamelijk onderzoek vitale parameters | Tijdens onderzoeksbezoeken zal alleen een specifiek lichamelijk onderzoek plaatsvinden op indicatie, gebaseerd op uw symptomen.                          |
| Ontlasting inleveren                    | Bij het polibezoek van week 12 wordt u gevraagd ontlasting in een potje op te vangen. Dit potje kunt u inleveren bij de arts/onderzoeker of bloedafname. |
| Vragenlijsten                           | Als u het ziekenhuis bezoekt of een telefonische afspraak heeft wordt u gevraagd om online vragenlijsten in te vullen over uw algehele welzijn.          |
| Endoscopie                              | Bij voorkeur wordt er een kijkonderzoek van de darm uitgevoerd om de ziekteactiviteit in de darm te observeren na 12 weken en eventueel na 52 weken.     |

Denk eraan dat het mogelijk is dat we u vragen een procedure of test te herhalen als uw onderzoeksarts van mening is dat dit nodig is om uw aandoening te evalueren.

## Proefpersoneninformatie

| Onderzoeks-procedures                                                       | Geschiktheids-onderzoek | Inductiebehandeling |        |         |         |         | Onderhoudsbehandeling |         |         |
|-----------------------------------------------------------------------------|-------------------------|---------------------|--------|---------|---------|---------|-----------------------|---------|---------|
|                                                                             |                         | Week 0              | Week 2 | Week 4* | Week 8* | Week 12 | Week 24               | Week 36 | Week 52 |
| <i>Poliklinisch bezoek</i>                                                  | X                       |                     |        | X       |         | X       | X                     |         | X       |
| <i>Telefonisch consult</i>                                                  |                         | X                   | X      |         | X       |         |                       | X       |         |
| Medische voorgeschiedenis                                                   | X                       |                     |        |         |         |         |                       |         |         |
| Lichamelijk onderzoek <sup>a</sup>                                          | (X)                     |                     |        |         |         |         |                       |         |         |
| Medicijngebruik                                                             | X                       |                     | X      | X       | X       | X       | X                     | X       | X       |
| Bloedonderzoek <sup>b</sup>                                                 | X                       |                     |        | X       |         | X       | X                     |         | X       |
| Ontlastingsmonster <sup>c</sup>                                             | X                       |                     |        |         |         | X       | X                     |         | X       |
| Vragenlijst ziekteactiviteit <sup>d</sup>                                   | X                       |                     | X      | X       | X       | X       | X                     | X       | X       |
| Vragenlijst kwaliteit van leven, gezondheid, moeheid, stemming <sup>e</sup> | X                       |                     |        | X       |         | X       | X                     |         | X       |
| Coloscopie <sup>f</sup>                                                     | X                       |                     |        |         |         | X       |                       |         | (X)     |

a Lichamelijk onderzoek kan omvatten lengte, gewicht, vitale functies, onderzoek van de buik en zo nodig hart en longen

b In het bloed worden bloedcellen en ontstekingswaarden onderzocht

c In de stoelgang wordt het stofje fecaal calprotectine (FCP) gemeten ter beoordeling van de ziekteactiviteit van uw darmziekte

d Hierbij wordt door middel van enkele vragen de ziekteactiviteit gemeten

e Er wordt 1 vragenlijst afgenomen over de ziekteactiviteit, 1 over uw kwaliteit van leven, 2 over algemene gezondheid, 2 over moeheid en 3 over stemming.

f Bij voorkeur wordt er een kijkonderzoek van de darm uitgevoerd om de ziekteactiviteit in de darm te observeren

## Bijlage C: Bijwerkingen en risico's

### Bijwerkingen

De medicatie wordt in een hele lage dosering voorgeschreven, maar kan in theorie bijwerkingen geven. In eerdere studies met kleine aantallen patiënten werden de volgende bijwerkingen genoemd: levendige dromen, slaperigheid, hoofdpijn.

Tekenen van allergische reacties kunnen zijn: beklemmend gevoel op de borst, piepende ademhaling, ernstige duizeligheid of een licht gevoel in het hoofd, zwellingen van de lippen, tong of keel, jeuk of huiduitslag. Neem direct contact op met uw huisarts en breng de arts-onderzoeker op de hoogte.

Bij hoge dosering Naltrexon komen de volgende bijwerkingen *zeer vaak* voor (1 op de 10 mensen): hoofdpijn, slaapstoornissen, onrust, nervositeit, angst, buikpijn, buikkrampen, misselijkheid, braken, gewrichtspijn, spierpijn, lichaamsszwakte.

Bij hoge dosering Naltrexon komen de volgende bijwerkingen *vaak* voor (1 op de 10 mensen): verminderde eetlust, diarree, obstipatie, dorst, koude rillingen, verhoogde energie, prikkelbaarheid, stemmingswisselingen, affectiestoornis, duizeligheid, huiduitslag, vertraagde ejaculatie, erectiele disfunctie, snelle hartslag, hartkloppingen, pijn in borstkas, verandering in hartfilmpje, toegenomen transpiratie, verhoogde traanproductie, urineretentie.

### Interacties met andere geneesmiddelen

Het wordt afgeraden om gelijktijdig geneesmiddelen te gebruiken die opioïden bevatten. Combinatie met middelen die toxisch zijn voor de lever vermijden. Vermijd zo mogelijk combinatie met centraal werkende medicatie bij hoge bloeddruk zoals alfa-methyldopa.

Wees voorzichtig met combineren met de volgende middelen: barbituraten, benzodiazepinen, andere anxiolytica zoals meprobamaat, hypnotica, sedatieve antidepressiva (bv. amitriptyline, doxepine, mianserine), sedatieve antihistaminica en neuroleptica zoals droperidol.

Naltrexon verhoogt de plasmaspiegel van acamprosaat.



## Bijlage D: Informatie over de verzekering

Voor iedereen die meedoet aan dit onderzoek, heeft de verrichter een verzekering afgesloten. De verzekering dekt schade door deelname aan het onderzoek. Dit geldt voor schade tijdens het onderzoek of binnen vier jaar na het einde van uw deelname aan het onderzoek. Schade moet u binnen die vier jaar aan de verzekeraar hebben gemeld.

De verzekering dekt niet alle schade. Onderaan deze tekst staat in het kort welke schade niet wordt gedekt.

Deze bepalingen staan in het Besluit verplichte verzekering bij medisch-wetenschappelijk onderzoek met mensen. Dit besluit staat op [www.ccmo.nl](http://www.ccmo.nl), de website van de Centrale Commissie Mensgebonden Onderzoek (zie 'Bibliotheek' en dan 'Wet- en regelgeving').

Bij schade kunt u direct contact leggen met de verzekeraar.

De verzekeraar van het onderzoek is:

Naam: CNA Insurance Company Limited

Adres: Polarisavenue 140, 2134 JX Hoofddorp

Telefoonnummer: +31(0)23-3036004, +31(0)638059413 ...

E-mail: [claimsnetherlands@cna Hardy.com](mailto:claimsnetherlands@cna Hardy.com) ...

De verzekering biedt een dekking van maximaal € 650.000 per proefpersoon en € 5.000.000 voor het hele onderzoek € 7.500.000 per jaar voor alle onderzoeken van dezelfde opdrachtgever.

De verzekering dekt de volgende schade **niet**:

- schade door een risico waarover u in de schriftelijke informatie bent ingelicht. Dit geldt niet als het risico zich ernstiger voordoet dan was voorzien of als het risico heel onwaarschijnlijk was;
- schade aan uw gezondheid die ook zou zijn ontstaan als u niet aan het onderzoek had meegedaan;
- schade door het niet (volledig) opvolgen van aanwijzingen of instructies;
- schade aan uw nakomelingen, als gevolg van een negatief effect van het onderzoek op u of uw nakomelingen;
- schade door een bestaande behandelmethode bij onderzoek naar bestaande behandelmethoden.

## Bijlage E: Toestemmingsformulier proefpersoon

### Lage dosering Naltrexon voor het in remissie brengen van de ziekte van Crohn

- Ik heb de informatiebrief gelezen. Ook kon ik vragen stellen. Mijn vragen zijn voldoende beantwoord. Ik had genoeg tijd om te beslissen of ik meedoe.
- Ik weet dat meedoen vrijwillig is. Ook weet ik dat ik op ieder moment kan beslissen om toch niet mee te doen of te stoppen met het onderzoek. Daarvoor hoef ik geen reden te geven.
- Ik geef toestemming voor het informeren van mijn huisarts/behandelend specialist/apotheker op de hoogte wordt/worden gebracht dat ik meedoe aan dit onderzoek.
- Ik geef toestemming voor het verzamelen en gebruiken van mijn medische gegevens, bloedmonsters en lichaamsmateriaal voor de beantwoording van de onderzoeksvraag in dit onderzoek.
- Ik weet dat voor de controle van het onderzoek sommige mensen toegang tot al mijn gegevens kunnen krijgen. Die mensen staan vermeld in deze informatiebrief. Ik geef toestemming voor die inzage door deze personen.
- Ik geef toestemming voor het informeren van mijn huisarts en/of behandelend specialist van onverwachte bevindingen die van belang (kunnen) zijn voor mijn gezondheid.
- Ik weet dat ik niet zwanger mag worden tijdens het onderzoek
- Ik geef toestemming voor het verstrekken van mijn naam en adresgegevens middels een recept aan de apotheek van het Erasmus MC.
- Ik geef  **wel**  
 **geen**  
toestemming om mijn lichaamsmateriaal en persoonsgegevens na dit onderzoek te bewaren en om dit later nog voor toekomstig onderzoek te gebruiken, zoals in de informatiebrief staat.
- Ik wil meedoen aan dit onderzoek.

-----  
Naam proefpersoon:

Handtekening:

Datum: \_\_ / \_\_ / \_\_

-----  
Ik verklaar dat ik deze proefpersoon volledig heb geïnformeerd over het genoemde onderzoek. Als er tijdens het onderzoek informatie bekend wordt die de toestemming van de proefpersoon zou kunnen beïnvloeden, dan breng ik hem/haar daarvan tijdig op de hoogte.

Naam onderzoeker (of diens vertegenwoordiger):

Handtekening:

Datum: \_\_ / \_\_ / \_\_



SPIRIT 2013 Checklist: Recommended items to address in a clinical trial protocol and related documents\*

| Section/item                      | Item No | Description                                                                                                                                                                                                                                                                              | Addressed on page number |
|-----------------------------------|---------|------------------------------------------------------------------------------------------------------------------------------------------------------------------------------------------------------------------------------------------------------------------------------------------|--------------------------|
| <b>Administrative information</b> |         |                                                                                                                                                                                                                                                                                          |                          |
| Title                             | 1       | Descriptive title identifying the study design, population, interventions, and, if applicable, trial acronym                                                                                                                                                                             | ___ 1 ___                |
| Trial registration                | 2a      | Trial identifier and registry name. If not yet registered, name of intended registry                                                                                                                                                                                                     | ___ 1 & 6 ___            |
|                                   | 2b      | All items from the World Health Organization Trial Registration Data Set                                                                                                                                                                                                                 | _____                    |
| Protocol version                  | 3       | Date and version identifier                                                                                                                                                                                                                                                              | ___ 1&3 ___              |
| Funding                           | 4       | Sources and types of financial, material, and other support                                                                                                                                                                                                                              | ___ 1 ___                |
| Roles and responsibilities        | 5a      | Names, affiliations, and roles of protocol contributors                                                                                                                                                                                                                                  | ___ 1 ___                |
|                                   | 5b      | Name and contact information for the trial sponsor                                                                                                                                                                                                                                       | ___ 1 ___                |
|                                   | 5c      | Role of study sponsor and funders, if any, in study design; collection, management, analysis, and interpretation of data; writing of the report; and the decision to submit the report for publication, including whether they will have ultimate authority over any of these activities | ___ 1 ___                |
|                                   | 5d      | Composition, roles, and responsibilities of the coordinating centre, steering committee, endpoint adjudication committee, data management team, and other individuals or groups overseeing the trial, if applicable (see Item 21a for data monitoring committee)                         | _____                    |

|    |                                                           |     |                                                                                                               |               |
|----|-----------------------------------------------------------|-----|---------------------------------------------------------------------------------------------------------------|---------------|
| 1  | <b>Introduction</b>                                       |     |                                                                                                               |               |
| 2  |                                                           |     |                                                                                                               |               |
| 3  | Background and                                            | 6a  | Description of research question and justification for undertaking the trial, including summary of relevant   | _____ 3 _____ |
| 4  | rationale                                                 |     | studies (published and unpublished) examining benefits and harms for each intervention                        |               |
| 5  |                                                           |     |                                                                                                               |               |
| 6  |                                                           | 6b  | Explanation for choice of comparators                                                                         | _____ 3 _____ |
| 7  |                                                           |     |                                                                                                               |               |
| 8  | Objectives                                                | 7   | Specific objectives or hypotheses                                                                             | _____ 3 _____ |
| 9  |                                                           |     |                                                                                                               |               |
| 10 | Trial design                                              | 8   | Description of trial design including type of trial (eg, parallel group, crossover, factorial, single group), |               |
| 11 |                                                           |     | allocation ratio, and framework (eg, superiority, equivalence, noninferiority, exploratory)                   | _____ 3 _____ |
| 12 |                                                           |     |                                                                                                               |               |
| 13 |                                                           |     |                                                                                                               |               |
| 14 | <b>Methods: Participants, interventions, and outcomes</b> |     |                                                                                                               |               |
| 15 |                                                           |     |                                                                                                               |               |
| 16 | Study setting                                             | 9   | Description of study settings (eg, community clinic, academic hospital) and list of countries where data will | _____ 4 _____ |
| 17 |                                                           |     | be collected. Reference to where list of study sites can be obtained                                          |               |
| 18 |                                                           |     |                                                                                                               |               |
| 19 | Eligibility criteria                                      | 10  | Inclusion and exclusion criteria for participants. If applicable, eligibility criteria for study centres and  | _____ 4 _____ |
| 20 |                                                           |     | individuals who will perform the interventions (eg, surgeons, psychotherapists)                               |               |
| 21 |                                                           |     |                                                                                                               |               |
| 22 | Interventions                                             | 11a | Interventions for each group with sufficient detail to allow replication, including how and when they will be | _____ 5 _____ |
| 23 |                                                           |     | administered                                                                                                  |               |
| 24 |                                                           |     |                                                                                                               |               |
| 25 |                                                           | 11b | Criteria for discontinuing or modifying allocated interventions for a given trial participant (eg, drug dose  | _____ 6 _____ |
| 26 |                                                           |     | change in response to harms, participant request, or improving/worsening disease)                             |               |
| 27 |                                                           |     |                                                                                                               |               |
| 28 |                                                           | 11c | Strategies to improve adherence to intervention protocols, and any procedures for monitoring adherence        | _____ 5 _____ |
| 29 |                                                           |     | (eg, drug tablet return, laboratory tests)                                                                    |               |
| 30 |                                                           |     |                                                                                                               |               |
| 31 |                                                           | 11d | Relevant concomitant care and interventions that are permitted or prohibited during the trial                 | _____ 5 _____ |
| 32 |                                                           |     |                                                                                                               |               |
| 33 | Outcomes                                                  | 12  | Primary, secondary, and other outcomes, including the specific measurement variable (eg, systolic blood       | _____ 6 _____ |
| 34 |                                                           |     | pressure), analysis metric (eg, change from baseline, final value, time to event), method of aggregation (eg, |               |
| 35 |                                                           |     | median, proportion), and time point for each outcome. Explanation of the clinical relevance of chosen         |               |
| 36 |                                                           |     | efficacy and harm outcomes is strongly recommended                                                            |               |
| 37 |                                                           |     |                                                                                                               |               |
| 38 | Participant timeline                                      | 13  | Time schedule of enrolment, interventions (including any run-ins and washouts), assessments, and visits for   | _____ 5 _____ |
| 39 |                                                           |     | participants. A schematic diagram is highly recommended (see Figure)                                          |               |
| 40 |                                                           |     |                                                                                                               |               |
| 41 |                                                           |     |                                                                                                               |               |
| 42 |                                                           |     |                                                                                                               |               |
| 43 |                                                           |     |                                                                                                               |               |
| 44 |                                                           |     |                                                                                                               |               |
| 45 |                                                           |     |                                                                                                               |               |
| 46 |                                                           |     |                                                                                                               |               |

|   |             |    |                                                                                                                                                                                       |             |
|---|-------------|----|---------------------------------------------------------------------------------------------------------------------------------------------------------------------------------------|-------------|
| 1 | Sample size | 14 | Estimated number of participants needed to achieve study objectives and how it was determined, including clinical and statistical assumptions supporting any sample size calculations | _____6_____ |
| 2 |             |    |                                                                                                                                                                                       |             |
| 3 |             |    |                                                                                                                                                                                       |             |
| 4 | Recruitment | 15 | Strategies for achieving adequate participant enrolment to reach target sample size                                                                                                   | _____6_____ |
| 5 |             |    |                                                                                                                                                                                       |             |

### 6 **Methods: Assignment of interventions (for controlled trials)**

#### 7 Allocation:

|    |                                  |     |                                                                                                                                                                                                                                                                                                                                                          |             |
|----|----------------------------------|-----|----------------------------------------------------------------------------------------------------------------------------------------------------------------------------------------------------------------------------------------------------------------------------------------------------------------------------------------------------------|-------------|
| 8  |                                  |     |                                                                                                                                                                                                                                                                                                                                                          |             |
| 9  |                                  |     |                                                                                                                                                                                                                                                                                                                                                          |             |
| 10 | Sequence generation              | 16a | Method of generating the allocation sequence (eg, computer-generated random numbers), and list of any factors for stratification. To reduce predictability of a random sequence, details of any planned restriction (eg, blocking) should be provided in a separate document that is unavailable to those who enrol participants or assign interventions | _____6_____ |
| 11 |                                  |     |                                                                                                                                                                                                                                                                                                                                                          |             |
| 12 |                                  |     |                                                                                                                                                                                                                                                                                                                                                          |             |
| 13 |                                  |     |                                                                                                                                                                                                                                                                                                                                                          |             |
| 14 |                                  |     |                                                                                                                                                                                                                                                                                                                                                          |             |
| 15 |                                  |     |                                                                                                                                                                                                                                                                                                                                                          |             |
| 16 | Allocation concealment mechanism | 16b | Mechanism of implementing the allocation sequence (eg, central telephone; sequentially numbered, opaque, sealed envelopes), describing any steps to conceal the sequence until interventions are assigned                                                                                                                                                | _____6_____ |
| 17 |                                  |     |                                                                                                                                                                                                                                                                                                                                                          |             |
| 18 |                                  |     |                                                                                                                                                                                                                                                                                                                                                          |             |
| 19 |                                  |     |                                                                                                                                                                                                                                                                                                                                                          |             |
| 20 | Implementation                   | 16c | Who will generate the allocation sequence, who will enrol participants, and who will assign participants to interventions                                                                                                                                                                                                                                | _____6_____ |
| 21 |                                  |     |                                                                                                                                                                                                                                                                                                                                                          |             |
| 22 |                                  |     |                                                                                                                                                                                                                                                                                                                                                          |             |
| 23 |                                  |     |                                                                                                                                                                                                                                                                                                                                                          |             |
| 24 | Blinding (masking)               | 17a | Who will be blinded after assignment to interventions (eg, trial participants, care providers, outcome assessors, data analysts), and how                                                                                                                                                                                                                | _____6_____ |
| 25 |                                  |     |                                                                                                                                                                                                                                                                                                                                                          |             |
| 26 |                                  |     |                                                                                                                                                                                                                                                                                                                                                          |             |
| 27 |                                  | 17b | If blinded, circumstances under which unblinding is permissible, and procedure for revealing a participant's allocated intervention during the trial                                                                                                                                                                                                     | _____6_____ |
| 28 |                                  |     |                                                                                                                                                                                                                                                                                                                                                          |             |
| 29 |                                  |     |                                                                                                                                                                                                                                                                                                                                                          |             |
| 30 |                                  |     |                                                                                                                                                                                                                                                                                                                                                          |             |

### 31 **Methods: Data collection, management, and analysis**

|    |                         |     |                                                                                                                                                                                                                                                                                                                                                                                                              |             |
|----|-------------------------|-----|--------------------------------------------------------------------------------------------------------------------------------------------------------------------------------------------------------------------------------------------------------------------------------------------------------------------------------------------------------------------------------------------------------------|-------------|
| 32 |                         |     |                                                                                                                                                                                                                                                                                                                                                                                                              |             |
| 33 | Data collection methods | 18a | Plans for assessment and collection of outcome, baseline, and other trial data, including any related processes to promote data quality (eg, duplicate measurements, training of assessors) and a description of study instruments (eg, questionnaires, laboratory tests) along with their reliability and validity, if known. Reference to where data collection forms can be found, if not in the protocol | _____5_____ |
| 34 |                         |     |                                                                                                                                                                                                                                                                                                                                                                                                              |             |
| 35 |                         |     |                                                                                                                                                                                                                                                                                                                                                                                                              |             |
| 36 |                         |     |                                                                                                                                                                                                                                                                                                                                                                                                              |             |
| 37 |                         |     |                                                                                                                                                                                                                                                                                                                                                                                                              |             |
| 38 |                         |     |                                                                                                                                                                                                                                                                                                                                                                                                              |             |
| 39 |                         | 18b | Plans to promote participant retention and complete follow-up, including list of any outcome data to be collected for participants who discontinue or deviate from intervention protocols                                                                                                                                                                                                                    | _____5_____ |
| 40 |                         |     |                                                                                                                                                                                                                                                                                                                                                                                                              |             |
| 41 |                         |     |                                                                                                                                                                                                                                                                                                                                                                                                              |             |
| 42 |                         |     |                                                                                                                                                                                                                                                                                                                                                                                                              |             |

|    |                                 |     |                                                                                                                                                                                                                                                                                                                                       |             |
|----|---------------------------------|-----|---------------------------------------------------------------------------------------------------------------------------------------------------------------------------------------------------------------------------------------------------------------------------------------------------------------------------------------|-------------|
| 1  | Data management                 | 19  | Plans for data entry, coding, security, and storage, including any related processes to promote data quality (eg, double data entry; range checks for data values). Reference to where details of data management procedures can be found, if not in the protocol                                                                     | _____6_____ |
| 2  |                                 |     |                                                                                                                                                                                                                                                                                                                                       |             |
| 3  |                                 |     |                                                                                                                                                                                                                                                                                                                                       |             |
| 4  |                                 |     |                                                                                                                                                                                                                                                                                                                                       |             |
| 5  | Statistical methods             | 20a | Statistical methods for analysing primary and secondary outcomes. Reference to where other details of the statistical analysis plan can be found, if not in the protocol                                                                                                                                                              | _____7_____ |
| 6  |                                 |     |                                                                                                                                                                                                                                                                                                                                       |             |
| 7  |                                 |     |                                                                                                                                                                                                                                                                                                                                       |             |
| 8  |                                 | 20b | Methods for any additional analyses (eg, subgroup and adjusted analyses)                                                                                                                                                                                                                                                              | _____7_____ |
| 9  |                                 |     |                                                                                                                                                                                                                                                                                                                                       |             |
| 10 |                                 | 20c | Definition of analysis population relating to protocol non-adherence (eg, as randomised analysis), and any statistical methods to handle missing data (eg, multiple imputation)                                                                                                                                                       | _____       |
| 11 |                                 |     |                                                                                                                                                                                                                                                                                                                                       |             |
| 12 |                                 |     |                                                                                                                                                                                                                                                                                                                                       |             |
| 13 |                                 |     |                                                                                                                                                                                                                                                                                                                                       |             |
| 14 | <b>Methods: Monitoring</b>      |     |                                                                                                                                                                                                                                                                                                                                       |             |
| 15 |                                 |     |                                                                                                                                                                                                                                                                                                                                       |             |
| 16 | Data monitoring                 | 21a | Composition of data monitoring committee (DMC); summary of its role and reporting structure; statement of whether it is independent from the sponsor and competing interests; and reference to where further details about its charter can be found, if not in the protocol. Alternatively, an explanation of why a DMC is not needed | _____       |
| 17 |                                 |     |                                                                                                                                                                                                                                                                                                                                       |             |
| 18 |                                 |     |                                                                                                                                                                                                                                                                                                                                       |             |
| 19 |                                 |     |                                                                                                                                                                                                                                                                                                                                       |             |
| 20 |                                 |     |                                                                                                                                                                                                                                                                                                                                       |             |
| 21 |                                 |     |                                                                                                                                                                                                                                                                                                                                       |             |
| 22 |                                 | 21b | Description of any interim analyses and stopping guidelines, including who will have access to these interim results and make the final decision to terminate the trial                                                                                                                                                               | _____       |
| 23 |                                 |     |                                                                                                                                                                                                                                                                                                                                       |             |
| 24 |                                 |     |                                                                                                                                                                                                                                                                                                                                       |             |
| 25 | Harms                           | 22  | Plans for collecting, assessing, reporting, and managing solicited and spontaneously reported adverse events and other unintended effects of trial interventions or trial conduct                                                                                                                                                     | _____7_____ |
| 26 |                                 |     |                                                                                                                                                                                                                                                                                                                                       |             |
| 27 |                                 |     |                                                                                                                                                                                                                                                                                                                                       |             |
| 28 | Auditing                        | 23  | Frequency and procedures for auditing trial conduct, if any, and whether the process will be independent from investigators and the sponsor                                                                                                                                                                                           | _____       |
| 29 |                                 |     |                                                                                                                                                                                                                                                                                                                                       |             |
| 30 |                                 |     |                                                                                                                                                                                                                                                                                                                                       |             |
| 31 |                                 |     |                                                                                                                                                                                                                                                                                                                                       |             |
| 32 | <b>Ethics and dissemination</b> |     |                                                                                                                                                                                                                                                                                                                                       |             |
| 33 |                                 |     |                                                                                                                                                                                                                                                                                                                                       |             |
| 34 | Research ethics approval        | 24  | Plans for seeking research ethics committee/institutional review board (REC/IRB) approval                                                                                                                                                                                                                                             | _____7_____ |
| 35 |                                 |     |                                                                                                                                                                                                                                                                                                                                       |             |
| 36 |                                 |     |                                                                                                                                                                                                                                                                                                                                       |             |
| 37 | Protocol amendments             | 25  | Plans for communicating important protocol modifications (eg, changes to eligibility criteria, outcomes, analyses) to relevant parties (eg, investigators, REC/IRBs, trial participants, trial registries, journals, regulators)                                                                                                      | _____7_____ |
| 38 |                                 |     |                                                                                                                                                                                                                                                                                                                                       |             |
| 39 |                                 |     |                                                                                                                                                                                                                                                                                                                                       |             |
| 40 |                                 |     |                                                                                                                                                                                                                                                                                                                                       |             |
| 41 |                                 |     |                                                                                                                                                                                                                                                                                                                                       |             |
| 42 |                                 |     |                                                                                                                                                                                                                                                                                                                                       |             |

|    |                               |     |                                                                                                                                                                                                                                                                                     |             |
|----|-------------------------------|-----|-------------------------------------------------------------------------------------------------------------------------------------------------------------------------------------------------------------------------------------------------------------------------------------|-------------|
| 1  | Consent or assent             | 26a | Who will obtain informed consent or assent from potential trial participants or authorised surrogates, and how (see Item 32)                                                                                                                                                        | _____4_____ |
| 2  |                               |     |                                                                                                                                                                                                                                                                                     |             |
| 3  |                               |     |                                                                                                                                                                                                                                                                                     |             |
| 4  |                               | 26b | Additional consent provisions for collection and use of participant data and biological specimens in ancillary studies, if applicable                                                                                                                                               | _____       |
| 5  |                               |     |                                                                                                                                                                                                                                                                                     |             |
| 6  |                               |     |                                                                                                                                                                                                                                                                                     |             |
| 7  | Confidentiality               | 27  | How personal information about potential and enrolled participants will be collected, shared, and maintained in order to protect confidentiality before, during, and after the trial                                                                                                | _____       |
| 8  |                               |     |                                                                                                                                                                                                                                                                                     |             |
| 9  |                               |     |                                                                                                                                                                                                                                                                                     |             |
| 10 | Declaration of interests      | 28  | Financial and other competing interests for principal investigators for the overall trial and each study site                                                                                                                                                                       | _____9_____ |
| 11 |                               |     |                                                                                                                                                                                                                                                                                     |             |
| 12 |                               |     |                                                                                                                                                                                                                                                                                     |             |
| 13 | Access to data                | 29  | Statement of who will have access to the final trial dataset, and disclosure of contractual agreements that limit such access for investigators                                                                                                                                     | _____9_____ |
| 14 |                               |     |                                                                                                                                                                                                                                                                                     |             |
| 15 |                               |     |                                                                                                                                                                                                                                                                                     |             |
| 16 | Ancillary and post-trial care | 30  | Provisions, if any, for ancillary and post-trial care, and for compensation to those who suffer harm from trial participation                                                                                                                                                       | _____7_____ |
| 17 |                               |     |                                                                                                                                                                                                                                                                                     |             |
| 18 |                               |     |                                                                                                                                                                                                                                                                                     |             |
| 19 |                               |     |                                                                                                                                                                                                                                                                                     |             |
| 20 | Dissemination policy          | 31a | Plans for investigators and sponsor to communicate trial results to participants, healthcare professionals, the public, and other relevant groups (eg, via publication, reporting in results databases, or other data sharing arrangements), including any publication restrictions | _____       |
| 21 |                               |     |                                                                                                                                                                                                                                                                                     |             |
| 22 |                               |     |                                                                                                                                                                                                                                                                                     |             |
| 23 |                               |     |                                                                                                                                                                                                                                                                                     |             |
| 24 |                               | 31b | Authorship eligibility guidelines and any intended use of professional writers                                                                                                                                                                                                      | _____       |
| 25 |                               |     |                                                                                                                                                                                                                                                                                     |             |
| 26 |                               | 31c | Plans, if any, for granting public access to the full protocol, participant-level dataset, and statistical code                                                                                                                                                                     | _____9_____ |
| 27 |                               |     |                                                                                                                                                                                                                                                                                     |             |
| 28 |                               |     |                                                                                                                                                                                                                                                                                     |             |
| 29 | <b>Appendices</b>             |     |                                                                                                                                                                                                                                                                                     |             |
| 30 |                               |     |                                                                                                                                                                                                                                                                                     |             |
| 31 | Informed consent materials    | 32  | Model consent form and other related documentation given to participants and authorised surrogates                                                                                                                                                                                  | _____       |
| 32 |                               |     |                                                                                                                                                                                                                                                                                     |             |
| 33 |                               |     |                                                                                                                                                                                                                                                                                     |             |
| 34 | Biological specimens          | 33  | Plans for collection, laboratory evaluation, and storage of biological specimens for genetic or molecular analysis in the current trial and for future use in ancillary studies, if applicable                                                                                      | _____       |
| 35 |                               |     |                                                                                                                                                                                                                                                                                     |             |
| 36 |                               |     |                                                                                                                                                                                                                                                                                     |             |

\*It is strongly recommended that this checklist be read in conjunction with the SPIRIT 2013 Explanation & Elaboration for important clarification on the items. Amendments to the protocol should be tracked and dated. The SPIRIT checklist is copyrighted by the SPIRIT Group under the Creative Commons "[Attribution-NonCommercial-NoDerivs 3.0 Unported](https://creativecommons.org/licenses/by-nc-nd/3.0/)" license.

# BMJ Open

**Low Dose Naltrexone for the induction of remission in patients with mild to moderate Crohn's Disease: protocol for the randomized, double-blinded, placebo-controlled, multicentre LDN Crohn study.**

|                                 |                                                                                                                                                                                                                |
|---------------------------------|----------------------------------------------------------------------------------------------------------------------------------------------------------------------------------------------------------------|
| Journal:                        | <i>BMJ Open</i>                                                                                                                                                                                                |
| Manuscript ID                   | bmjopen-2021-058358.R2                                                                                                                                                                                         |
| Article Type:                   | Protocol                                                                                                                                                                                                       |
| Date Submitted by the Author:   | 23-Mar-2022                                                                                                                                                                                                    |
| Complete List of Authors:       | Paulides, Emma; Erasmus MC, Gastroenterology and Hepatology; Lie, Mitchell R.K.L.; Erasmus University Medical Center, Department of Gastroenterology & Hepatology van der Woude, Christien Janneke; Erasmus MC |
| <b>Primary Subject Heading</b>: | Gastroenterology and hepatology                                                                                                                                                                                |
| Secondary Subject Heading:      | Gastroenterology and hepatology, Pharmacology and therapeutics                                                                                                                                                 |
| Keywords:                       | Inflammatory bowel disease < GASTROENTEROLOGY, Adult gastroenterology < GASTROENTEROLOGY, Clinical trials < THERAPEUTICS                                                                                       |
|                                 |                                                                                                                                                                                                                |

SCHOLARONE™  
Manuscripts



1  
2 **Low Dose Naltrexone for the induction of remission in patients with mild to moderate Crohn's Disease:**  
3 **protocol for the randomized, double-blinded, placebo-controlled, multicentre LDN Crohn study.**  
4  
5

6  
7 Emma Paulides (MD)<sup>1</sup>, Mitchell R.K.L. Lie (MD, PhD)<sup>1</sup>, C. Janneke van der Woude (MD, PhD)<sup>1</sup>  
8

9  
10 1. Department of Gastroenterology & Hepatology, Erasmus University Medical Center, Rotterdam,  
11 The Netherlands.  
12

13  
14  
15 Short title: RCT with LDN for the induction of remission in CD.  
16

17 Word count: 3069  
18

19 Protocol version 4, June 2021  
20

21 Corresponding author:  
22

23 C.J. van der Woude, MD, PhD  
24 Erasmus University Medical Center  
25 Doctor Molewaterplein 40  
26 3015 GD Rotterdam, The Netherlands  
27  
28 Email: [c.vanderwoude@erasmusmc.nl](mailto:c.vanderwoude@erasmusmc.nl)  
29  
30  
31  
32  
33  
34  
35  
36  
37  
38  
39  
40  
41  
42  
43  
44  
45  
46  
47  
48  
49  
50  
51  
52  
53  
54  
55  
56  
57  
58  
59  
60

## ABSTRACT

**Introduction:** Crohn's disease (CD) is an inflammatory bowel disease (IBD). Several drugs exist to induce and maintain remission, but a significant part of the patients is refractory to current IBD drugs or experiences side effects. Whether low dose naltrexone (LDN) is a safe and easily accessible alternative treatment option for these patients needs to be investigated. The aim of this study is to assess the efficacy of LDN for the induction of remission in patients with mild to moderate CD.

**Methods and analysis:** The LDN Crohn study is a randomized, double-blinded, placebo-controlled multicentre trial. Patients with CD are randomized 1:1 to receive treatment with either LDN 4.5 mg once daily or placebo for 12 weeks. The primary objective is endoscopic remission at week 12, defined as SES-CD  $\leq 2$  and ulcerated surface subscore  $\leq 1$  in all five segments. Secondary aims include clinical and endoscopic response, changes in laboratory measures of inflammation, adverse events and patient-reported outcomes. To have 85% power to detect a true difference in the primary outcome measure between placebo and LDN, 61 patients will be needed in both groups.

**Ethics and dissemination:** The study is approved by the Medical Ethics Committee of the Erasmus MC, Rotterdam, the Netherlands (registration number NL69149.078.19, MEC-2019-0602). Results will be published in peer-reviewed journals and presented at international conferences.

**Trial registration numbers:** EudraCT registry (2019-000852-32); Dutch trial registry (NL9259).

### Strengths and limitations of this study

- The LDN Crohn study is the first randomized, double-blinded, placebo-controlled multicentre study that investigates the efficacy of low dose naltrexone for the induction of remission of mild to moderate Crohn's disease in adults.
- The results of this study will help to decide whether LDN might be an alternative option for inducing remission in patients with mild to moderate Crohn's disease.
- LDN is cheap and has a low adverse events profile.
- The National Crohn and colitis patient's organisation is involved and patient-reported outcomes are included.
- The mechanism of action and long-term safety aspects of LDN in patients with mild to moderate Crohn's disease are not yet fully understood.

## INTRODUCTION

Crohn's disease (CD) is a chronic, progressive, inflammatory disease of the gastrointestinal tract. Treatment strategies aim to induce sustained remission, by controlling inflammation and preventing complications of the disease. The last decade, an increasing number of new drugs with different mechanisms of action have been introduced to induce and/or maintain remission in CD. Although the currently available therapies are effective in many patients, all therapies have their individual safety concerns.(1) Immunosuppressive drugs or combination therapy with biologicals might induce bone marrow suppression, liver test abnormalities, malignancies and do have immunogenic risks.(2) Further, the introduction of biologicals resulted in increased drug and societal costs.(3) The lifelong nature of CD increases the probability that patients have cycled through various therapies, leaving few approved options. Thus, alternative treatments that are less expensive and have a favourable side effect profile remain of continued interest.

A relatively unknown area of interest in the therapy of inflammatory bowel diseases (IBD) is the role of the opioid system. Available evidence suggests that the endogenous opioid system is involved in gastrointestinal inflammation.(4, 5) Animal and human studies showed that the  $\mu$ -opioid receptor (MOR) was upregulated in subjects with IBD. In addition, they demonstrated that MOR agonists can decrease inflammation through regulation of pro inflammatory cytokine release and T-cell proliferation.(6, 7) This led to the idea of new therapeutic options for the treatment of IBD by the development of selective MOR agonists. A familiar MOR agonist is naltrexone: an orally administered narcotic antagonist that is approved for the treatment of alcohol dependence by the European Medicines Agency (EMA) and Food and Drug Administration (FDA).(8) When administered at high concentrations, for example 50 mg, this drug acts as an agonist by blocking the endogenous opioid effects. However, administered in lower doses such as 4.5 mg, it is assumed that this lower naltrexone dose results in upregulation of endogenous enkephalin and endorphin levels and has a positive modulatory effect on the MOR, thereby controlling gut inflammation.(9, 10) Thus, the use of so called low dose naltrexone (LDN) in the clinical settings has gained interest in IBD.

At the Erasmus MC, a pilot study was performed to evaluate the effect of LDN on the clinical, biochemical and cellular level in patients with IBD. In this study, patients not in remission and not responding to conventional therapy were offered to initiate LDN as a concomitant treatment. Among 47 patients that started LDN, 74.5% experienced clinical improvement and 25.5% clinical remission at week 12. A minority of the patients experienced side effects, but these were relatively mild and consisted of vivid dreams, drowsiness, and headache. LDN therapy resulted in reduced endoplasmic reticulum stress in biopsies from inflamed mucosa, and led to improved wound healing in *in vitro* models.(11) To objectively define the effect of LDN on intestinal inflammation, a randomized controlled trial with endoscopic assessment is necessary. Only via an objective assessment we can elucidate the exact role of LDN in the treatment of patients with CD.

Therefore, the aim of this study is to prospectively assess the efficacy of LDN as induction therapy in patients with active CD.

## METHODS

This protocol includes the standard protocol items recommended for interventional trials according to the Standard Protocol Items: Recommendations for Interventional Trials (SPIRIT) guidelines.<sup>(12)</sup> The most recent study protocol (Protocol version 4, June 2021) is presented in this manuscript. The date of the first enrolment was 14 January 2021.

### Study setting

This randomized, double-blinded, placebo-controlled multicentre trial is currently being performed at departments of Gastroenterology and Hepatology in the Netherlands, including both academic and non-academic centers. At this stage, 7 hospitals are participating, and we are currently expanding the number of collaborating centers. Patients that underwent a colonoscopy and seem eligible for inclusion or patients that are interested will receive information about the study via the doctor or researcher, at the clinic or by phone. Eligible patients with active CD are randomized 1:1 to receive treatment with either LDN 4.5 mg once daily or placebo, for 12 weeks. After 12 weeks patients are invited to participate in an open label exploratory extension study until week 52. Adult patients with mild to moderately active CD, defined by endoscopy with mucosal ulcers in the ileum and/or colon and a Simple Endoscopic Score-CD (SES-CD) of 3-15, who visit the outpatient clinic of the department of Gastroenterology and Hepatology of participating hospitals are eligible.<sup>(13)</sup> Clinical visits are planned at week 0, 4, 12 and if applicable week 24 and 52. Telephone consults are scheduled at week 2, 8 and if applicable week 36. See Figure 1 for the flowchart of the study design. Prior to enrolment, all patients must sign informed consent (Appendix 1).

## PARTICIPANTS

### Eligibility criteria

Patients with mild to moderately active CD, defined by endoscopy with mucosal ulcers in the ileum or colon or both, and SES-CD of 3-15, aged 18 years or older who visit the outpatient clinic of the department of Gastroenterology and Hepatology of participating hospitals are eligible. Endoscopic assessment up to 2 months prior to the start of the study is mandatory. Permitted concomitant CD therapies are: aminosalicylates, azathioprine, 6-mercaptopurine, thioguanine and methotrexate provided the dose prescribed has been stable for at least 4 weeks prior to randomization; dose must be stable for the first 10 weeks after randomization. Oral corticosteroid therapy (prednisone prescribed at a stable dose  $\leq$  30 mg/day or budesonide prescribed at a stable dose of  $\leq$  9 mg/day) must have been stable for 2 weeks prior to randomization, and tapering during the study is mandatory. The use of other investigational products, biologicals, JAK-STAT inhibitors, cyclosporine, thalidomide and tacrolimus is prohibited, and these medicines need to be stopped 12 weeks prior to the start of the study. Other exclusion criteria are opioid use, drugs and/or alcohol abuse, pregnancy or lactation, stool positive for an infectious agent, and other significant medical conditions that might interfere with the study (such as a stricture causing symptoms or fistulising disease complicated by infection).

## INTERVENTIONS

### Investigational product

In this study, the participants will be given naltrexone 4,5 mg or placebo once a day. This dose is used because of the agonistic effect of naltrexone on the mu opioid receptor when administered at a low dose, and because data on efficacy and safety of this dose is already available. The active substance in the investigational medicinal product is naltrexone hydrochloride. Naltrexone is a derivative of

1  
2 noroxymorphone that is the N-cyclopropylmethyl congener of naloxone. It is a narcotic antagonist that is  
3 effective orally, and longer lasting and more potent than naloxone. The placebo IMP for this trial has the  
4 same qualitative composition, except naltrexone hydrochloride. Therefore, placebo and LDN capsules are  
5 identical in appearance. The remaining ingredients are: Microcrystalline cellulose PH-102, Colloidal  
6 anhydrous silica, Magnesium stearate and Lactose monohydrate 100 mesh. Naltrexone (50 mg) was  
7 approved for the treatment of alcohol dependence in June 2010 by the EMA and FDA. EU-procedure  
8 number: NL/H/1151/001/DC Registration number in the Netherlands: RVG 102900.  
9

### 11 **Patient reported outcomes**

12  
13  
14 During every scheduled consult, patients are asked to fill out questionnaires online, see Table 1. This  
15 includes the Patient Reported Outcome-2 (PRO2)(14) and the Harvey Bradshaw Index (HBI)(15) for disease  
16 activity, the short Inflammatory Bowel Disease Questionnaire (SIBDQ)(16) and the 5-level EuroQol Five  
17 Dimensions Health Questionnaire (EQ5D-5L)(17) for quality of life, the Work Productivity and Activity  
18 Impairment Questionnaire (WPAI)(18) for work productivity, fatigue via The Functional Assessment of  
19 Chronic Illness Therapy – Fatigue (FACIT-F)(19) and Multidimensional Fatigue Inventory (MFI)(20) and sleep,  
20 anxiety and depression via the Patient-Reported Outcomes Measurement Information System (NIH  
21 PROMIS)(21).  
22  
23

### 24 **Endoscopic assessment**

25  
26  
27 A colonoscopy will be performed during screening (maximum of 8 weeks before the start of the study) and  
28 at the end of the induction phase at week 12. If patients are willing to participate in the open label follow-  
29 up study, an extra colonoscopy can be performed at week 52, see Figure 1. Colonoscopy allows for direct  
30 mucosal visualisation and the performance of biopsies. By using the SES-CD, activity, and severity of CD  
31 before and after treatment can be determined.  
32  
33

### 34 **Serum and stool samples**

35  
36 Baseline blood and stool samples will be obtained from all participants, with a maximum of 8 weeks before  
37 the start of the therapy. During the study, blood will be checked at week 4 and 12 and every 3 months  
38 during the maintenance phase if applicable, see Table 1. Laboratory tests include: urea, creatinine, CRP,  
39 aspartate transaminase, alanine transaminase, lactate dehydrogenase, alkaline phosphatase, haemoglobin,  
40 mean corpuscular volume, thrombocytes, leukocytes. Faecal calprotectin (FC) will be collected at week 12,  
41 and if applicable at week 24 and 52. This granulocyte-derived protein is measured in the stool and is a non-  
42 invasive, cheap and extensively studied biomarker that correlates with clinical and endoscopic disease  
43 activity.(22)  
44  
45  
46

### 47 **Disease worsening criteria**

48  
49 Patients that show an increase in HBI at 2 consecutive visits can be discontinued from blinded treatment  
50 and can be offered the option to receive open-label therapy. If a subject experiences significant worsening  
51 of underlying CD, which requires any of the prohibited medications or surgical intervention at any point  
52 during the study, treatment discontinuation should be considered at investigator's discretion.  
53  
54  
55

## 56 **OUTCOMES**

57  
58 See Table 1 for the schedule of study procedures and interventions.  
59  
60

### **Primary outcome**

1  
2 The aim of this study is to prospectively assess the efficacy of LDN for the induction of remission in patients  
3 with mild to moderate active CD. The primary objective is endoscopic remission at week 12, defined as SES-  
4 CD  $\leq 2$  and an ulcerated surface subscore  $\leq 1$  in all five segments.(13)  
5

## 6 **Secondary outcomes**

### 7 *Disease activity*

- 8 • The proportion of patients in steroid free clinical remission defined as a HBI score of  $\leq 4$  and complete  
9 tapering of systemic corticosteroids and endoscopic remission at week 12.
- 10 • Response defined by a decrease in HBI of  $\geq 3$  points compared to baseline and endoscopic response  
11 defined as a reduction of SES-CD score by  $\geq 50\%$  versus baseline at week 12.
- 12 • Changes in laboratory measures of inflammation (CRP and FC) from baseline at week 12, 24 and 52.
- 13 • Proportion of patients in corticosteroid free clinical remission at week 52.
- 14 • Endoscopic remission and response at week 52.
- 15 • Response via the HBI and PRO2.

### 16 *Quality of life*

- 17 • Quality of life, via the SIBDQ and EQ5D.
- 18 • Fatigue, via the FACIT-F and MFI.
- 19 • Anxiety, depression and sleep disturbance, via the PROMIS NIH.

### 20 *Healthcare costs and work*

- 21 • Work productivity via the WPAI.
- 22 • Healthcare costs will be calculated and the EQ-5D utility will be used to derive a quality-adjusted life year  
23 (QALY) estimate.

## 24 **Sample size**

25  
26 A power analysis was performed on the primary outcome of achieving endoscopic remission. Based on  
27 previous research, it was estimated that the mucosal healing rates at week 12 would be 25% for LDN and  
28 5% for placebo, and the dropout rate 5%. To have 85% power to detect a true difference in the primary  
29 outcome measure between placebo and LDN, 61 patients will be needed in both groups. In total, we plan  
30 to recruit 122 patients to include into the study. All statistical analyses will be performed using 2-sided tests  
31 with  $\alpha = 0.05$ .(11) A sample size calculation based on the data of a smaller RCT from Smith et al (2011),  
32 resulted in a lower sample size.(23) Because we were unsure if this patient population was representative  
33 of our population, we aim to include 122 patients.  
34

## 35 **ASSIGNMENT OF INTERVENTIONS**

36 Eligible patients will be randomized to one of two groups (LDN or placebo) in a 1:1 ratio. The pharmacy that  
37 produced the trial medication numbered the bottles with unique package numbers, according to a  
38 randomization schedule that was generated by a statistician. The trial medication is being stored at the  
39 pharmacy of the Erasmus MC and will be sent directly to the participant after inclusion. Patient, doctor and  
40 investigator are blinded, and if unblinding is necessary, a pharmacist from the Erasmus MC pharmacy will  
41 be asked to provide the information required.  
42

## 43 **DATA MANAGEMENT AND ANALYSIS**

44 Data of all participating centres will be collected and entered both by participants and staff in electronic  
45 case report forms of Gemstracker, an electronic database set up for clinical trials.(24) Data will be coded,  
46

1  
2 stored and monitored by certified personnel following good clinical practice guidelines. When subjects are  
3 withdrawn from the study, they will not be replaced. When missings are random, imputation of missing  
4 data can be carried out. Patients that are lost to follow up will be incorporated until their lost to follow up  
5 date only, as it is a per protocol approach. Missing and lost to follow up patients will be described. Adverse  
6 events will be registered at every visit and in case of a serious adverse event reported to the METC of the  
7 Erasmus MC.  
8  
9

## 10 **Statistical methods**

11  
12 Demographic and patient data will be described using frequencies and percentages for categorical  
13 variables. Continuous variables will be described using mean and standard deviation, or median and  
14 interquartile range for non-normally distributed variables. Categorical variables will be compared between  
15 groups using Chi-squared test and continuous variables using the t-test or Mann-Whitney U test for non-  
16 normally distributed variables. A p-value of <0.05 will be considered statistically significant  
17  
18  
19

20 The primary outcome endoscopic remission at week 12, will be compared between the LDN and placebo  
21 group using a chi-square test. The difference between the steroid free clinical remission between the LDN  
22 and placebo group, defined by a HBI score of  $\leq 4$  and complete tapering of systemic corticosteroids and  
23 endoscopic remission at week 12, will be measured using a chi-square test. Response, defined by a  
24 decrease in HBI of  $\geq 3$  points compared to baseline and endoscopic response defined as a reduction of SES-  
25 CD score by  $\geq 50\%$  at week 12 compared to baseline, will be analysed using a chi-square test. Proportion of  
26 patients in corticosteroid free clinical remission and endoscopic remission at week 52 will be analysed using  
27 a chi-square test as well. Changes in laboratory measures of inflammation (CRP and FC) within each group  
28 will be analysed using a paired T-test. The evolution of different patient reported outcomes over time will  
29 be analysed using mixed models.  
30  
31  
32  
33

## 34 **ETHICS AND DISSEMINATION**

35  
36 This study is approved by the METC of the Erasmus MC, Rotterdam, the Netherlands (registration number  
37 NL69149.078.19, MEC-2019-0602) on 31 January 2020. Important protocol modifications are assessed and  
38 approved by the METC, and reported to participating investigators. The LDN Crohn study has been  
39 registered at the Dutch trial registry (NL9259). Results will be published in peer-reviewed journals and  
40 presented at international conferences.  
41  
42

## 43 **PATIENT AND PUBLIC INVOLVEMENT STATEMENT**

44  
45 This study was designed in collaboration with a patient with IBD and with the Dutch Crohn's and Colitis  
46 patient organization.<sup>(25)</sup> We will engage closely with the patient organisation to communicate research  
47 findings to inform patients on the effectiveness of LDN on controlling inflammation. Patient reported  
48 outcomes are included in our study to measure the impact of the intervention on the patient's life.  
49  
50  
51  
52  
53  
54  
55  
56  
57  
58  
59  
60

## DISCUSSION

In this double-blinded and placebo-controlled study, the effectiveness of LDN for the induction of remission of patients with mild to moderate CD is being investigated. The benefits of this therapy will be the anti-inflammatory effects, the low frequency and mild side-effects, the oral administration route, and low costs. Thereby, this study will have direct impact on the management of CD patients by determining if LDN is useful in the treatment of mild to moderate CD. If LDN is capable of inducing remission, this drug might be implemented in the treatment strategies for patients with CD.

In addition to the preliminary study of the Erasmus MC, several pilot studies have been executed that investigated the effect of LDN therapy in active IBD. An open-label pilot study in 17 patients showed a clinical response in 89% and clinical remission in 67% of the participants after 12 weeks of LDN therapy. Sleep disturbance was the most common side effect, occurring in seven patients.(26) The same research group conducted a subsequent randomized, placebo-controlled, double blind study in 34 IBD patients, and found a response rate of 88% in the LDN group versus 40% in the placebo group after 12 weeks of therapy. In addition, 33% of the participants achieved endoscopic remission in the LDN group vs 8% in placebo group.(23) Furthermore, LDN appeared safe and was well tolerated when investigated in a pilot RCT with 12 paediatric IBD patients. They showed a significant reduction in PCDAI scores after 8 weeks, with 25% of patients achieving clinical remission and 67% showing clinical improvement in the LDN group.(27) The authors from The Cochrane Database concluded in their review that there is currently insufficient evidence to allow any firm conclusions regarding the efficacy and safety of LDN, and further randomized controlled trials are required.(28)

A quasi-experimental before-and-after study from Norway investigated whether initiation of LDN therapy by IBD patients resulted in changes in the use of concomitant IBD medication. The investigators identified 582 IBD patients that had at least one LDN prescription recorded in the Norwegian Prescription Database in 2013. Among the 256 patients that became persistent LDN users, there were reductions in number of users of various examined medicines. In addition, the reductions in number of users were larger in persistent LDN users compared to less frequent users for different IBD drugs. This may suggest that LDN use is associated with the use of less concurrent IBD medication in this group of patients, leading to a reduction in costs and in a lowered risk of adverse events.(29)

A strength of this study is the double-blinded and placebo-controlled design, that provides the strongest possible evidence of causation. Further, the primary outcome defined by mucosal healing, assessed by a colonoscopy before and after induction therapy, is the gold standard for evaluating disease activity. In addition, biochemical measures and self-reported disease activity are assessed to follow-up response and relapse over time. There are no evident limitations in the design of the trial, but the anti-inflammatory mechanism of action of LDN is not yet fully understood.

The efficacy signals demonstrated in the (pilot) clinical trials, as well as the beneficial findings in nonclinical models of disease and the overall safety and tolerability of LDN that have been elucidated to date, result in a favourable benefit-risk profile for this agent in continued investigation as a treatment for CD. Therefore, this randomized, double-blinded, placebo-controlled multicentre trial will provide important insights into the anti-inflammatory effects of LDN in patients with mild to moderate active CD. If LDN is able to induce remission, this drug might be regarded as a first line therapy in the treatment of active CD because of the oral administration, affordability and anticipated low frequency of side effects.



## AUTHORS' CONTRIBUTIONS

CW conceived the idea for the study, designed the protocol and supervises study execution. ML designed the protocol and drafted the manuscript. EP designed the protocol, executes the study and drafted the manuscript. All authors provided critical revision of the manuscript for important intellectual content and approved the final draft of the protocol for submission.

## ACKNOWLEDGEMENT

We thank Dr. A.C. de Vries, Dr. R.L. West, Drs. S. Nikkessen, T. Markus, Dr. E. Ista for their help in designing the study. We want to thank prof. dr. E.W. Steyerberg for the statistical support.

## FUNDING SOURCES

The investigator initiated LDN Crohn study is supported by the Netherlands Organisation for Health Research and Development (ZonMw, Good use of medication, grant number 848082001). ZonMw is part of the Netherlands Organisation for Scientific Research (NWO).

## COMPETING INTEREST

Professor CJ van der Woude has served on advisory boards for Abbvie, Takeda, Pfizer and Celltrion. She is supported by research funding from ZonMW, Tramedico, and Pfizer.

## PATIENT AND PUBLIC INVOLVEMENT

Patients and the patient organisation were involved in the design of this research. Refer to the Methods section for further details.

## PATIENT CONSENT FOR PUBLICATION

Not required.

## DATA AVAILABILITY STATEMENT

The dataset generated during the LDN Crohn study is available on reasonable request.

## REFERENCES

1. Torres J, Mehandru S, Colombel JF, Peyrin-Biroulet L. Crohn's disease. *Lancet*. 2017;389(10080):1741-55.
2. Torres J, Bonovas S, Doherty G, Kucharzik T, Gisbert JP, Raine T, et al. ECCO Guidelines on Therapeutics in Crohn's Disease: Medical Treatment. *J Crohns Colitis*. 2020;14(1):4-22.
3. van Linschoten RCA, Visser E, Niehot CD, van der Woude CJ, Hazelzet JA, van Noord D, et al. Systematic review: societal cost of illness of inflammatory bowel disease is increasing due to biologics and varies between continents. *Aliment Pharmacol Ther*. 2021;54(3):234-48.
4. Mani AR, Moore KP. New insights into the role of endogenous opioids in the pathogenesis of gastrointestinal and liver disease. *Gut*. 2009;58(7):893-5.
5. Sobczak M, Sałaga M, Storr MA, Fichna J. Physiology, signaling, and pharmacology of opioid receptors and their ligands in the gastrointestinal tract: current concepts and future perspectives. *J Gastroenterol*. 2014;49(1):24-45.
6. Philippe D, Chakass D, Thuru X, Zerbib P, Tsicopoulos A, Geboes K, et al. Mu opioid receptor expression is increased in inflammatory bowel diseases: implications for homeostatic intestinal inflammation. *Gut*. 2006;55(6):815-23.
7. Philippe D, Dubuquoy L, Groux H, Brun V, Chuoï-Mariot MT, Gaveriaux-Ruff C, et al. Anti-inflammatory properties of the mu opioid receptor support its use in the treatment of colon inflammation. *J Clin Invest*. 2003;111(9):1329-38.
8. Agency EM. Guideline on the development of medicinal products for the treatment of alcohol dependence: European Medicines Agency; [updated 18 February 2010. Available from: [https://www.ema.europa.eu/en/documents/scientific-guideline/guideline-development-medicinal-products-treatment-alcohol-dependence\\_en.pdf](https://www.ema.europa.eu/en/documents/scientific-guideline/guideline-development-medicinal-products-treatment-alcohol-dependence_en.pdf).
9. Matters GL, Harms JF, McGovern C, Fitzpatrick L, Parikh A, Nilo N, et al. The opioid antagonist naltrexone improves murine inflammatory bowel disease. *J Immunotoxicol*. 2008;5(2):179-87.
10. Tawfik DI, Osman AS, Tolba HM, Khatlab A, Abdel-Salam LO, Kamel MM. Evaluation of therapeutic effect of low dose naltrexone in experimentally-induced Crohn's disease in rats. *Neuropeptides*. 2016;59:39-45.
11. Lie M, van der Giessen J, Fuhler GM, de Lima A, Peppelenbosch MP, van der Ent C, et al. Low dose Naltrexone for induction of remission in inflammatory bowel disease patients. *J Transl Med*. 2018;16(1):55.
12. SPIRIT 2013 Statement: Defining Standard Protocol Items for Clinical Trials. *Annals of Internal Medicine*. 2013;158(3):200-7.
13. Daperno M, D'Haens G, Van Assche G, Baert F, Bulois P, Maunoury V, et al. Development and validation of a new, simplified endoscopic activity score for Crohn's disease: the SES-CD. *Gastrointest Endosc*. 2004;60(4):505-12.
14. Bojic D, Bodger K, Travis S. Patient Reported Outcome Measures (PROMs) in Inflammatory Bowel Disease: New Data. *J Crohns Colitis*. 2017;11(suppl\_2):S576-S85.
15. Harvey RF, Bradshaw JM. A simple index of Crohn's-disease activity. *Lancet*. 1980;1(8167):514.
16. Irvine EJ, Zhou Q, Thompson AK. The Short Inflammatory Bowel Disease Questionnaire: a quality of life instrument for community physicians managing inflammatory bowel disease. CCRPT Investigators. Canadian Crohn's Relapse Prevention Trial. *Am J Gastroenterol*. 1996;91(8):1571-8.
17. EuroQol G. EuroQol--a new facility for the measurement of health-related quality of life. *Health Policy*. 1990;16(3):199-208.
18. Reilly MC, Zbrozek AS, Dukes EM. The validity and reproducibility of a work productivity and activity impairment instrument. *Pharmacoeconomics*. 1993;4(5):353-65.
19. Yellen SB, Cella DF, Webster K, Blendowski C, Kaplan E. Measuring fatigue and other anemia-related symptoms with the Functional Assessment of Cancer Therapy (FACT) measurement system. *J Pain Symptom Manage*. 1997;13(2):63-74.
20. Smets EM, Garssen B, Bonke B, De Haes JC. The Multidimensional Fatigue Inventory (MFI) psychometric qualities of an instrument to assess fatigue. *J Psychosom Res*. 1995;39(3):315-25.
21. Terwee CB, Roorda LD, de Vet HC, Dekker J, Westhovens R, van Leeuwen J, et al. Dutch-Flemish translation of 17 item banks from the patient-reported outcomes measurement information system (PROMIS). *Qual Life Res*. 2014;23(6):1733-41.

- 1  
2  
3  
4  
5  
6  
7  
8  
9  
10  
11  
12  
13  
14  
15  
16  
17  
18  
19  
20  
21  
22  
23  
24  
25  
26  
27  
28  
29  
30  
31  
32  
33  
34  
35  
36  
37  
38  
39  
40  
41  
42  
43  
44  
45  
46  
47  
48  
49  
50  
51  
52  
53  
54  
55  
56  
57  
58  
59  
60
22. Turner D, Ricciuto A, Lewis A, D'Amico F, Dhaliwal J, Griffiths AM, et al. STRIDE-II: An Update on the Selecting Therapeutic Targets in Inflammatory Bowel Disease (STRIDE) Initiative of the International Organization for the Study of IBD (IOIBD): Determining Therapeutic Goals for Treat-to-Target strategies in IBD. *Gastroenterology*. 2021;160(5):1570-83.
23. Smith JP, Bingaman SI, Ruggiero F, Mauger DT, Mukherjee A, McGovern CO, et al. Therapy with the opioid antagonist naltrexone promotes mucosal healing in active Crohn's disease: a randomized placebo-controlled trial. *Dig Dis Sci*. 2011;56(7):2088-97.
24. GEneric Medical Survey Tracker [updated 03 December 2020. Available from: <https://gemstracker.org/wiki/doku.php?id=start>.
25. Crohn-colitis: Crohn & Colitis NL; [Available from: <https://www.crohn-colitis.nl/>.
26. Smith JP, Stock H, Bingaman S, Mauger D, Rogosnitzky M, Zagon IS. Low-dose naltrexone therapy improves active Crohn's disease. *Am J Gastroenterol*. 2007;102(4):820-8.
27. Smith JP, Field D, Bingaman SI, Evans R, Mauger DT. Safety and tolerability of low-dose naltrexone therapy in children with moderate to severe Crohn's disease: a pilot study. *J Clin Gastroenterol*. 2013;47(4):339-45.
28. Parker CE, Nguyen TM, Segal D, MacDonald JK, Chande N. Low dose naltrexone for induction of remission in Crohn's disease. *Cochrane Database Syst Rev*. 2018;4(4):CD010410.
29. Raknes G, Simonsen P, Småbrekke L. The Effect of Low-Dose Naltrexone on Medication in Inflammatory Bowel Disease: A Quasi Experimental Before-and-After Prescription Database Study. *J Crohns Colitis*. 2018;12(6):677-86.

1  
2 Figure legends  
3

4 Figure 1. Flowchart of the study design, with endoscopy as primary outcome at week 12. FC: fecal  
5 calprotectine, LDN: low dose naltrexone, T: telephone consult, C: clinical consults, W: week .  
6  
7  
8  
9  
10  
11  
12  
13  
14  
15  
16  
17  
18  
19  
20  
21  
22  
23  
24  
25  
26  
27  
28  
29  
30  
31  
32  
33  
34  
35  
36  
37  
38  
39  
40  
41  
42  
43  
44  
45  
46  
47  
48  
49  
50  
51  
52  
53  
54  
55  
56  
57  
58  
59  
60

For peer review only

Table 1. Schedule of study procedures, interventions and assessments.

| Procedures                                      | Screening | Induction phase |        |         |         |         | Maintenance phase |         |         |
|-------------------------------------------------|-----------|-----------------|--------|---------|---------|---------|-------------------|---------|---------|
|                                                 |           | Week 0          | Week 2 | Week 4* | Week 8* | Week 12 | Week 24           | Week 36 | Week 52 |
| Clinical visit                                  | (X)       | X               |        | X       |         | X       | X                 |         | X       |
| Telephone consult                               | (X)       |                 | X      |         | X       |         |                   | X       |         |
| Eligibility screening                           | X         |                 |        |         |         |         |                   |         |         |
| Informed consent                                | X         |                 |        |         |         |         |                   |         |         |
| Colonoscopy                                     | X         |                 |        |         |         | X       |                   |         | (X)     |
| Laboratory tests*                               | X         |                 |        | X       |         | X       | X                 |         | X       |
| Feecal calprotectin                             | X         |                 |        |         |         | X       | X                 |         | X       |
| Baseline information                            |           | X               |        |         |         |         |                   |         |         |
| Concomitant medication                          |           | X               | X      | X       | X       | X       | X                 | X       | X       |
| HBI, PRO2                                       |           | X               | X      | X       | X       | X       | X                 | X       | X       |
| SIBDQ, EQ-5D-5L, FACIT-F, MFI, NIH-PROMIS, WPAI |           | X               |        | X       |         | X       | X                 |         | X       |
| Adverse events                                  |           |                 | X      | X       | X       | X       | X                 | X       | X       |

(X): optional, HBI: Harvey Bradshaw Index, PRO2: Patient Reported Outcome-2 (PRO2), SIBDQ: short Inflammatory Bowel Disease Questionnaire. EQ5D-5L: 5-level EuroQol Five Dimensions Health Questionnaire, FACIT-F: Functional Assessment of Chronic Illness Therapy – Fatigue (FACIT-F), MFI: Multidimensional Fatigue Inventory, NIH PROMIS: sleep, anxiety and depression via the Patient-Reported Outcomes Measurement Information System, WPAI: Work Productivity and Activity Impairment Questionnaire.

\*Laboratory tests include: urea, creatinine, CRP, aspartate transaminase, alanine transaminase, lactate dehydrogenase, alkaline phosphatase, haemoglobin, mean corpuscular volume, thrombocytes, leukocytes.



# Proefpersoneninformatie voor deelname aan medisch-wetenschappelijk onderzoek

## Naltrexon in lage dosering voor het in remissie brengen van de ziekte van Crohn

Officiële titel: Lage dosering Naltrexon voor inductie van remissie bij patiënten met een milde tot matige vorm van de ziekte van Crohn, waarbij de standaardtherapie onvoldoende werkt of teveel bijwerkingen geeft.

### Inleiding

Geachte heer/mevrouw,

Wij vragen u vriendelijk om mee te doen aan een medisch-wetenschappelijk onderzoek. Meedoen is vrijwillig. Om deel te nemen aan het onderzoek is wel uw schriftelijke toestemming nodig. U ontvangt deze brief omdat u de ziekte van Crohn heeft waarbij u onvoldoende effect ondervindt van uw huidige medicijnen of teveel last heeft van bijwerkingen. Voordat u beslist of u wil meedoen aan dit onderzoek, krijgt u uitleg over wat het onderzoek inhoudt. Lees deze informatie rustig door en vraag de onderzoeker uitleg als u vragen heeft. U kunt ook de onafhankelijk deskundige, die aan het eind van deze brief genoemd wordt, om aanvullende informatie vragen. Zie bijlage A voor contactgegevens. U kunt er ook over praten met uw partner, vrienden of familie. Verdere informatie over meedoen aan zo'n onderzoek staat in de bijgevoegde brochure 'Medisch-wetenschappelijk onderzoek'.

### 1. Algemene informatie

Dit onderzoek is opgezet door de afdeling Maag-, Darm- en Leverziekten van het Erasmus Medisch Centrum en wordt gedaan door artsen in meer dan 10 verschillende ziekenhuizen. Voor dit onderzoek zijn in totaal ruim 122 deelnemers nodig. De medisch-ethische toetsingscommissie van het Erasmus Medisch Centrum heeft dit onderzoek goedgekeurd. Algemene informatie over de toetsing van onderzoek vindt u in de brochure 'Medisch-wetenschappelijk onderzoek'.

### 2. Doel van het onderzoek

Het doel van het onderzoek is uitzoeken of een lage dosis naltrexon (LDN) de ziekte van Crohn in remissie kan brengen wanneer de huidige behandeling onvoldoende effect heeft of teveel bijwerkingen geeft. Tevens kijken we of het middel effect heeft op moeheid en stemming. Het is de bedoeling om de gevonden resultaten te publiceren.

### 3. Achtergrond van het onderzoek

De ziekte van Crohn behoort samen met colitis ulcerosa tot de groep Inflammatoire darmziekten (IBD). Deze ontstekingsziekten van de darm gaan gepaard met afwisselend rustige en actieve ziekteperiodes. De behandeling bestaat onder andere uit medicatie om de symptomen te verminderen en de ontsteking tot rust te brengen. De huidige behandeling van een patiënt met een milde ziekte van Crohn (CD) start in het algemeen met corticosteroïden. Hierna worden vaak als onderhoudsmedicatie immunosuppressiva gegeven, meestal thiopurines. Bij een groot deel van de patiënten is de ziekte met deze medicijnen goed onder controle. Echter bij een gedeelte van de patiënten is een vervolg stap naar biologische medicatie nodig.

Uit enkele kleine onderzoeken komt naar voren dat het medicijn Naltrexon (LDN), in lage doseringen, mogelijk ook gebruikt kan worden om de ziekte rustig te houden. Naltrexon heeft een gunstiger bijwerkingen profiel dan de biologische medicatie. Deze studie vergelijkt de werking van Naltrexon in lage dosering met een placebo, voor het in remissie brengen van de ziekte van Crohn. Tevens wordt er gekeken of Naltrexon effect heeft op moeheid en stemming. Het onderzoek wordt uitgevoerd in meer dan 10 ziekenhuizen in Nederland.

### 4. Wat meedoen inhoudt

Als u meedoet duurt dat 3 maanden. Indien u hierna door wil gaan met het onderzoek om te kijken of Naltrexon ook werkt als onderhoudsmiddel duurt het tot maximaal een jaar.

#### Geschiktheidsonderzoek

Eerst bepalen we of u mee kunt doen aan het onderzoek. Uw behandelend arts meet de ziekteactiviteit van uw darmziekte door te vragen naar uw klachten en een onderzoek in de ontlasting te doen. Tevens bekijkt hij de darm vanbinnen door middel van een coloscopie. Ook vragen we naar uw medische voorgeschiedenis en medicijngebruik.

#### Opzet van het onderzoek

Om het effect van lage dosering Naltrexon optimaal te onderzoeken wordt het vergeleken met het gebruik van een niet werkzaam middel, ook wel placebo. U wordt gerandomiseerd voor één van beide middelen, wat inhoudt dat het door loting wordt bepaald welk middel u gaat gebruiken. U en de onderzoekers weten tijdens het onderzoek niet welk middel u gebruikt.

#### Bezoeken en metingen

Voor het onderzoek is het nodig dat u meerdere keren naar het ziekenhuis komt, namelijk 2 keer op (ongeveer) de volgende momenten: week 4 en 12. Indien u ervoor kiest ook in week 24 en 52.

Tijdens de ziekenhuisbezoeken zal het volgende gebeuren:

- Bloedafname – elk poliklinisch bezoek, hierin meten we de bloedcellen en ontstekingswaarden



## Proefpersoneninformatie

- Inleveren ontlasting– poliklinisch bezoek week 12, hierin meten we ontstekingswaarden
- Vragenlijsten invullen – poliklinisch bezoek, hierbij krijgt u vragen over uw klachten en kwaliteit van leven. Het invullen kost ongeveer 20 minuten.
- Coloscopie – dit gebeurt voorafgaand aan de studie, in week 12 en indien u ervoor kiest in week 52.

Tijdens 2 telefonische afspraken vragen wij of u last heeft van bijwerkingen en nemen we een korte vragenlijst af om de ziekte activiteit te scoren. Dit duurt 10 min.

**Anders dan bij gebruikelijke zorg**

Normaal komt u misschien één keer in de 3 of 6 maanden bij uw arts voor controle van uw Crohn. De bezoeken die bij dit onderzoek horen, komen in plaats van normale bezoeken. Vanzelfsprekend geeft u het zelf aan wanneer het niet goed met u gaat, zodat een extra afspraak gepland zal worden.

In bijlage B vindt u alle informatie die u nodig heeft over de onderzoeksbehandeling en de procedures van het onderzoek.

**5. Wat wordt er van u verwacht**

Om het onderzoek goed te laten verlopen en voor uw eigen veiligheid, is het belangrijk dat u zich aan de volgende afspraken houdt. Naast de hieronder genoemde, kunnen er nog andere regels zijn die uw onderzoekarts met u zal doornemen;

De afspraken zijn dat u:

- De medicijnen inneemt.
- Afspraken voor bezoeken nakomt;
- Niet ook nog aan een ander medisch-wetenschappelijk onderzoek meedoet;
- Alles vertelt aan uw onderzoekarts wat u weet over uw gezondheid en de medicijnen die u nu inneemt of mee begint tijdens het onderzoek. Bepaalde geneesmiddelen mogen niet gebruikt worden tijdens uw deelname aan het onderzoek. Als u dat niet doet, brengt u mogelijk uw eigen gezondheid in gevaar;
- Niet zwanger bent, wordt of borstvoeding geeft tijdens dit onderzoek. Overleg met uw arts over geschikte voorbehoedsmiddelen;
- De behandeling dient te onderbreken in overleg met u en de begeleidend onderzoekarts. Dit kan gebeuren als u symptomen heeft van een infectie, afwijkende bloedresultaten of een operatie moet ondergaan. Geef dit dan ook zo snel mogelijk door aan uw arts;

Het is belangrijk dat u contact opneemt met de onderzoeker:

- voordat u andere geneesmiddelen gaat gebruiken. Ook als dat homeopathische geneesmiddelen, natuurgeneesmiddelen, vitaminen en/of geneesmiddelen van de drogist zijn;
- als u in een ziekenhuis wordt opgenomen of behandeld;

## Proefpersoneninformatie

- als u plotseling gezondheidsklachten krijgt;
- als u zwanger wordt;
- als u niet meer wilt meedoen aan het onderzoek;
- als uw contactgegevens wijzigen.

## 6. Mogelijke risico's van deelname aan dit onderzoek

Elk geneesmiddel kan bijwerkingen geven of onvoorziene reacties veroorzaken. Bovendien kan iedere patiënt anders reageren op dezelfde dosering van het hetzelfde geneesmiddel. Het is mogelijk dat het geneesmiddel dat u gebruikt uw aandoening, de ziekte van Crohn, niet doeltreffend onder controle brengt.

### Bijwerkingen

Lees aandachtig bijlage C door met meer uitgebreide informatie over bijwerkingen en risico's. Doet u mee aan het onderzoek? Dan krijgt u de bijsluiter mee met het middel.

### Bloedafnames

Bloedafnames kunnen pijn doen of een bloeditstorting geven. Alles bij elkaar nemen we maximaal 4 buisjes bloed af tijdens de eerste 3 maanden van de studie, wat neerkomt op 34 ml bloed in totaal. Deze hoeveelheid geeft bij volwassenen geen problemen. Ter vergelijking: bij de bloedbank wordt 500 ml bloed per keer afgenomen. U kunt een gevoel van flauwte ervaren tijdens afname. Tijdens een bloedafname kan een prikaccident optreden, een verwonding met een naald waarbij het mogelijk is dat de persoon besmet raakt met een bloed overdraagbare aandoening zoals een virus. Ook een infectie is een mogelijk risico.

### Zwangerschap

Vrouwen die zwanger zijn of borstvoeding geven, kunnen niet meedoen aan dit onderzoek. Ook mogen vrouwen niet zwanger worden tijdens het onderzoek. De onderzoeker kan met u over geschikte voorbehoedsmiddelen praten. Vertel het uw arts onmiddellijk als u zwanger raakt.

## 7. Mogelijke voor- en nadelen

Het is belangrijk dat u de mogelijke voor- en nadelen goed afweegt voordat u besluit mee te doen. Naltrexon kan de ontstekingsactiviteit in de darmen verminderen, maar zeker is dat niet. Ieder individu reageert verschillend.

Nadelen van meedoen aan het onderzoek kunnen zijn:

- mogelijke bijwerkingen;
- mogelijke ongemakken van de metingen in het onderzoek.

## Proefpersoneninformatie

Deelname aan het onderzoek betekent ook:

- dat u extra tijd kwijt bent;
- dat extra testen afgenomen worden;
- dat u afspraken heeft waaraan u zich moet houden.

Al deze zaken zijn hiervoor onder punt 4, 5 en 6 beschreven.

## 8. Als u niet wilt meedoen of wilt stoppen met het onderzoek

U beslist zelf of u meedoet aan het onderzoek. Deelname is vrijwillig. Als u niet wil meedoen, wordt u op de gebruikelijke manier behandeld voor uw ziekte van Crohn. Uw arts kan u meer vertellen over de behandelingsmogelijkheden die er zijn en de voor- en nadelen daarvan.

Als u wel meedoet, kunt u zich altijd bedenken en toch stoppen, ook tijdens het onderzoek. U wordt dan weer op de gebruikelijke manier behandeld voor uw ziekte van Crohn. U hoeft niet te zeggen waarom u stopt. Wel moet u dit direct melden aan de onderzoeker. De gegevens die tot dat moment zijn verzameld, worden gebruikt voor het onderzoek.

Als er nieuwe informatie over het onderzoek is die belangrijk voor u is, laat de onderzoeker dit aan u weten. U wordt dan gevraagd of u blijft meedoen.

## 9. Einde van het onderzoek

Uw deelname aan het onderzoek stopt als

- alle bezoeken volgens het schema (bijlage B) zijn voltooid;
- het einde van het hele onderzoek is bereikt;
- u zelf kiest om te stoppen;
- u zwanger wordt;
- de onderzoeker het beter voor u vindt om te stoppen;
- de overheid of de beoordelende medisch-ethische toetsingscommissie, besluit om het onderzoek te stoppen.

Het hele onderzoek is afgelopen als alle deelnemers klaar zijn. De medicatie die u gebruikt heeft bij het onderzoek, is ook beschikbaar na afloop van het onderzoek aangezien het om in Nederland geregistreerde medicijnen gaat. De onderzoeker zal met u praten over de mogelijkheden voor verdere medische zorg.

Na het verwerken van alle gegevens informeert de onderzoeker u over de belangrijkste uitkomsten van het onderzoek. Dit gebeurt ongeveer 2 jaar na uw deelname.

## 10. Gebruik en bewaren van uw gegevens en lichaamsmateriaal

Voor dit onderzoek worden uw persoonsgegevens en lichaamsmateriaal verzameld, gebruikt en bewaard. Het gaat om gegevens zoals uw naam, geboortedatum en om gegevens over uw gezondheid waarvoor we uw elektronisch patiëntendossier inzien.

## Proefpersoneninformatie

Voor dit onderzoek is bloed en ontlasting nodig. Het verzamelen, gebruiken en bewaren van uw gegevens en uw lichaamsmateriaal is nodig om de vragen die in dit onderzoek worden gesteld te kunnen beantwoorden en de resultaten te kunnen publiceren. Wij vragen voor het gebruik van uw gegevens en lichaamsmateriaal uw toestemming.

### **Vertrouwelijkheid van uw gegevens en lichaamsmateriaal**

Om uw privacy te beschermen krijgen uw gegevens en uw lichaamsmateriaal een code. Uw naam en andere gegevens die u direct kunnen identificeren worden daarbij weggelaten. Alleen met de sleutel van de code zijn gegevens tot u te herleiden. De sleutel van de code blijft veilig opgeborgen in de lokale onderzoeksinstelling. De gegevens en lichaamsmateriaal die naar de onderzoeker worden gestuurd bevatten alleen de code, maar niet uw naam of andere gegevens waarmee u kunt worden geïdentificeerd. Ook in rapporten en publicaties over het onderzoek zijn de gegevens niet tot u te herleiden. Indien uw ziekenhuis gebruik maakt van het verzenden van studiemedicatie naar uw huisadres, worden uw naam en adresgegevens wel doorgegeven aan de apotheek van het Erasmus MC door middel van het voorgeschreven recept. U kunt hiervoor akkoord geven op het toestemmingsformulier.

### **Toegang tot uw gegevens voor controle**

De onderzoekers kunnen op de onderzoekslocatie toegang krijgen tot al uw gegevens. Ook tot de gegevens zonder code. Dit is nodig om te kunnen controleren of het onderzoek goed en betrouwbaar is uitgevoerd. Personen die ter controle inzage krijgen in uw gegevens zijn de commissie die de veiligheid van het onderzoek in de gaten houdt, een monitor die door de onderzoeker is ingehuurd en de Inspectie Gezondheidszorg en Jeugd. Zij houden uw gegevens geheim. Wij vragen u voor deze inzage toestemming te geven.

### **Bewaartermijn gegevens en lichaamsmateriaal voor dit onderzoek**

Uw gegevens moeten 15 jaar worden bewaard op de onderzoekslocatie na het beëindigen van de studie. Het wordt bewaard om daarop in de loop van dit onderzoek nog nieuwe bepalingen te kunnen doen die te maken hebben met dit onderzoek.

### **Bewaren en gebruik van gegevens en lichaamsmateriaal voor ander onderzoek**

Uw gegevens en lichaamsmateriaal kunnen na afloop van dit onderzoek ook nog van belang zijn voor ander wetenschappelijk onderzoek op het gebied van de ziekte van Crohn. U kunt op het toestemmingsformulier aangeven of u hier wel of niet mee instemt. Indien u hier niet mee instemt, kunt u gewoon deelnemen aan het huidige onderzoek.

### **Informatie over onverwachte bevindingen**

Tijdens dit onderzoek kan er bij toeval iets gevonden worden dat niet van belang is voor het onderzoek maar wel voor u. Als dit belangrijk is voor uw gezondheid, dan zult u op de hoogte worden gesteld door uw behandelend arts of de arts-onderzoeker. U kunt dan met uw huisarts of specialist bespreken wat er gedaan moet worden. Ook hiervoor geeft u toestemming.

Proefpersoneninformatie

### **Intrekken toestemming**

U kunt uw toestemming voor gebruik van uw persoonsgegevens altijd weer intrekken. Dit geldt voor dit onderzoek en ook voor het bewaren en het gebruik voor het toekomstige onderzoek. De onderzoeksgegevens die zijn verzameld tot het moment dat u uw toestemming intrekt worden nog wel gebruikt in het onderzoek. Uw lichaamsmateriaal wordt na intrekking van uw toestemming vernietigd. Als er al metingen met dat lichaamsmateriaal zijn gedaan, dan worden die gegevens nog wel gebruikt.

### **Meer informatie over uw rechten bij verwerking van gegevens**

Voor algemene informatie over uw rechten bij verwerking van uw persoonsgegevens kunt u de website van de Autoriteit Persoonsgegevens raadplegen: [www.erasmusmc.nl/cs-patientenzorg/372137/379076/bescherming.persoonsgegevens](http://www.erasmusmc.nl/cs-patientenzorg/372137/379076/bescherming.persoonsgegevens)

Bij vragen over uw rechten kunt u contact opnemen met de verantwoordelijke voor de verwerking van uw persoonsgegevens. Voor dit onderzoek is dat: *Erasmus Medisch Centrum*. Zie bijlage A voor contactgegevens.

Bij vragen of klachten over de verwerking van uw persoonsgegevens raden we u aan eerst contact op te nemen met de onderzoekslocatie. U kunt ook contact opnemen met de Functionaris voor de Gegevensbescherming van de instelling of de Autoriteit Persoonsgegevens, tevens opgenomen in bijlage A.

### **Registratie van het onderzoek**

Informatie over dit onderzoek is ook opgenomen in een overzicht van medisch-wetenschappelijke onderzoeken ([www.trialregister.nl](http://www.trialregister.nl)). Op deze site zijn geen gegevens opgenomen die naar u herleidbaar zijn. Na het onderzoek kan de website een samenvatting van de resultaten van dit onderzoek tonen.

## **11. Verzekering voor proefpersonen**

Voor iedereen die meedoet aan dit onderzoek is een verzekering afgesloten. De verzekering dekt schade door het onderzoek. Niet alle schade is gedekt. In bijlage D vindt u meer informatie over de verzekering en de uitzonderingen. Daar staat ook aan wie u schade kunt melden.

## **12. Informeren huisarts, behandelend specialist en apotheker**

Wij laten uw huisarts weten dat u meedoet aan het onderzoek. Het is ook mogelijk dat wij andere medisch specialisten waarbij u onder behandeling bent informeren over uw deelname aan dit onderzoek indien nodig. Dit is voor uw eigen veiligheid. Als u dit niet goed vindt, kunt u niet meedoen aan dit onderzoek. Als u geen huisarts heeft, kunt u niet deelnemen aan het onderzoek.

Proefpersoneninformatie

### 13. Vergoeding voor meedoen

De studiemedicatie, extra testen en behandeling voor het onderzoek kosten u niets. U wordt niet betaald voor het meedoen aan dit onderzoek. Bezoeken aan een arts, andere behandelingen of tests die geen deel uitmaken van dit onderzoek worden niet betaald.

### 14. Heeft u vragen?

Bij vragen kunt u contact opnemen met de onderzoeker. Voor onafhankelijk advies over meedoen aan dit onderzoek kunt u terecht bij de onafhankelijke arts. Hij weet veel over het onderzoek, maar heeft niets te maken met dit onderzoek.

Indien u klachten heeft over het onderzoek, kunt u dit bespreken met de onderzoeker of uw behandelend arts. Wilt u dit liever niet, dan kunt u zich wenden tot de klachtenfunctionaris/klachtencommissie.

Alle gegevens vindt u in bijlage A: Contactgegevens.

### 15. Ondertekening toestemmingsformulier

Wanneer u voldoende bedenktijd heeft gehad, wordt u gevraagd te beslissen over deelname aan dit onderzoek. Indien u toestemming geeft, zullen wij u vragen deze op de bijbehorende toestemmingsverklaring schriftelijk te bevestigen. Door uw schriftelijke toestemming geeft u aan dat u de informatie heeft begrepen en instemt met deelname aan het onderzoek.

Zowel uzelf als de onderzoeker ontvangen een getekende versie van deze toestemmingsverklaring.

Dank voor uw aandacht.

Proefpersoneninformatie

## 16. Bijlagen bij deze informatie

- A. Contactgegevens
- B. Onderzoeks- en behandelingsprocedures
- C. Bijwerkingen en risico's
- D. Informatie over de verzekering
- E. Toestemmingsformulier proefpersoon
- F. Brochure 'Medisch-wetenschappelijk onderzoek. Algemene informatie voor de proefpersoon' (2017)

For peer review only

Proefpersoneninformatie

## Bijlage A: Contactgegevens Erasmus MC

Als u vragen hebt over uw deelname aan dit onderzoek of uw rechten als deelnemer aan een onderzoek, of als u problemen of klachten heeft betreffende deelname aan het onderzoek, kunt u contact opnemen met de onderzoeksarts.

### Arts-onderzoeker:

drs. E. Paulides, Afdeling Maag-, Darm- en Leverziekten

Email adres: [e.paulides@erasmusmc.nl](mailto:e.paulides@erasmusmc.nl)

Hoofdonderzoeker: professor dr C.J. van der Woude. U kunt haar bereiken via arts-onderzoeker E. Paulides of via het secretariaat 010 7031693.

Centraal nummer Erasmus Medisch Centrum.

Telefoonnummer: 010 - 704 07 04

### Onafhankelijk deskundige

Als u zich zorgen maakt over uw deelname, kunt u een persoon raadplegen die niet betrokken is bij het onderzoek maar wel deskundige is op het gebied van dit onderzoek.

Dr. R.J. de Knecht, telefoonnummer secretaresse: 010 - 7035942

### Klachten

Als u niet tevreden bent over het onderzoek, kunt u terecht bij de onafhankelijke klachtencommissie van het Erasmus MC.

Telefoonnummer: 010 – 703 31 98

### Bescherming persoonsgegevens

Heeft u vragen of opmerkingen over de bescherming van uw privacy?

Neem dan contact op met de functionaris gegevensbescherming (FG) van het Erasmus MC

<https://www.erasmusmc.nl/nl-nl/patientenzorg/privacy>

E-mail [functionaris.gegevensbescherming@erasmusmc.nl](mailto:functionaris.gegevensbescherming@erasmusmc.nl)

Telefoonnummer: 010 – 703 49 86



## Bijlage B: Onderzoeksbehandeling en –procedures

### Inductie- en onderhoudsbehandeling

De behandeling tijdens de eerste 12 weken wordt de 'inductiebehandeling' genoemd. Het doel van de inductiebehandeling is de ontsteking in de darm tot rust te brengen. Daarna start de onderhoudsbehandeling, met als doel het voorkomen van nieuwe opvlammingen van uw ziekte van Crohn.

#### Week 0 t-m 12: inductiebehandeling

- Naltrexon 4.5 mg éénmaal daags of placebo. U en de onderzoekers weten niet welk middel u gedurende deze periode gebruikt.
- Als u corticosteroiden gebruikt worden deze rustig afgebouwd.

#### Week 12 t-m 52: onderhoudsbehandeling

- U kunt na 12 weken kiezen om het medicijn Naltrexon te gebruiken tot week 52, om de effecten op langere termijn te onderzoeken. U en de onderzoekers weten dan tijdens deze periode wel dat u het middel Naltrexon gebruikt. Wat u tijdens de eerste 12 weken heeft gebruikt blijft onbekend.

Als iets voorvalt waardoor de volledige dosis niet kan worden ingenomen of als u vragen of zorgen heeft over het geneesmiddel, neem dan onmiddellijk contact op met uw onderzoekscentrum voor verdere instructies.

| Bezoeken of metingen                    | Beschrijving                                                                                                                                             |
|-----------------------------------------|----------------------------------------------------------------------------------------------------------------------------------------------------------|
| Lichamelijk onderzoek vitale parameters | Tijdens onderzoeksbezoeken zal alleen een specifiek lichamelijk onderzoek plaatsvinden op indicatie, gebaseerd op uw symptomen.                          |
| Ontlasting inleveren                    | Bij het polibezoek van week 12 wordt u gevraagd ontlasting in een potje op te vangen. Dit potje kunt u inleveren bij de arts/onderzoeker of bloedafname. |
| Vragenlijsten                           | Als u het ziekenhuis bezoekt of een telefonische afspraak heeft wordt u gevraagd om online vragenlijsten in te vullen over uw algehele welzijn.          |
| Endoscopie                              | Bij voorkeur wordt er een kijkonderzoek van de darm uitgevoerd om de ziekteactiviteit in de darm te observeren na 12 weken en eventueel na 52 weken.     |

Denk eraan dat het mogelijk is dat we u vragen een procedure of test te herhalen als uw onderzoeksarts van mening is dat dit nodig is om uw aandoening te evalueren.

## Proefpersoneninformatie

| Onderzoeks-procedures                                                       | Geschiktheids-onderzoek | Inductiebehandeling |        |         |         |         | Onderhoudsbehandeling |         |         |
|-----------------------------------------------------------------------------|-------------------------|---------------------|--------|---------|---------|---------|-----------------------|---------|---------|
|                                                                             |                         | Week 0              | Week 2 | Week 4* | Week 8* | Week 12 | Week 24               | Week 36 | Week 52 |
| <i>Poliklinisch bezoek</i>                                                  | X                       |                     |        | X       |         | X       | X                     |         | X       |
| <i>Telefonisch consult</i>                                                  |                         | X                   | X      |         | X       |         |                       | X       |         |
| Medische voorgeschiedenis                                                   | X                       |                     |        |         |         |         |                       |         |         |
| Lichamelijk onderzoek <sup>a</sup>                                          | (X)                     |                     |        |         |         |         |                       |         |         |
| Medicijngebruik                                                             | X                       |                     | X      | X       | X       | X       | X                     | X       | X       |
| Bloedonderzoek <sup>b</sup>                                                 | X                       |                     |        | X       |         | X       | X                     |         | X       |
| Ontlastingsmonster <sup>c</sup>                                             | X                       |                     |        |         |         | X       | X                     |         | X       |
| Vragenlijst ziekteactiviteit <sup>d</sup>                                   | X                       |                     | X      | X       | X       | X       | X                     | X       | X       |
| Vragenlijst kwaliteit van leven, gezondheid, moeheid, stemming <sup>e</sup> | X                       |                     |        | X       |         | X       | X                     |         | X       |
| Coloscopie <sup>f</sup>                                                     | X                       |                     |        |         |         | X       |                       |         | (X)     |

a Lichamelijk onderzoek kan omvatten lengte, gewicht, vitale functies, onderzoek van de buik en zo nodig hart en longen

b In het bloed worden bloedcellen en ontstekingswaarden onderzocht

c In de stoelgang wordt het stofje fecaal calprotectine (FCP) gemeten ter beoordeling van de ziekteactiviteit van uw darmziekte

d Hierbij wordt door middel van enkele vragen de ziekteactiviteit gemeten

e Er wordt 1 vragenlijst afgenomen over de ziekteactiviteit, 1 over uw kwaliteit van leven, 2 over algemene gezondheid, 2 over moeheid en 3 over stemming.

f Bij voorkeur wordt er een kijkonderzoek van de darm uitgevoerd om de ziekteactiviteit in de darm te observeren

## Bijlage C: Bijwerkingen en risico's

### Bijwerkingen

De medicatie wordt in een hele lage dosering voorgeschreven, maar kan in theorie bijwerkingen geven. In eerdere studies met kleine aantallen patiënten werden de volgende bijwerkingen genoemd: levendige dromen, slaperigheid, hoofdpijn.

Tekenen van allergische reacties kunnen zijn: beklemmend gevoel op de borst, piepende ademhaling, ernstige duizeligheid of een licht gevoel in het hoofd, zwellingen van de lippen, tong of keel, jeuk of huiduitslag. Neem direct contact op met uw huisarts en breng de arts-onderzoeker op de hoogte.

Bij hoge dosering Naltrexon komen de volgende bijwerkingen *zeer vaak* voor (1 op de 10 mensen): hoofdpijn, slaapstoornissen, onrust, nervositeit, angst, buikpijn, buikkrampen, misselijkheid, braken, gewrichtspijn, spierpijn, lichaamsszwakte.

Bij hoge dosering Naltrexon komen de volgende bijwerkingen *vaak* voor (1 op de 10 mensen): verminderde eetlust, diarree, obstipatie, dorst, koude rillingen, verhoogde energie, prikkelbaarheid, stemmingswisselingen, affectiestoornis, duizeligheid, huiduitslag, vertraagde ejaculatie, erectiele disfunctie, snelle hartslag, hartkloppingen, pijn in borstkas, verandering in hartfilmpje, toegenomen transpiratie, verhoogde traanproductie, urineretentie.

### Interacties met andere geneesmiddelen

Het wordt afgeraden om gelijktijdig geneesmiddelen te gebruiken die opioïden bevatten. Combinatie met middelen die toxisch zijn voor de lever vermijden. Vermijd zo mogelijk combinatie met centraal werkende medicatie bij hoge bloeddruk zoals alfa-methyldopa.

Wees voorzichtig met combineren met de volgende middelen: barbituraten, benzodiazepinen, andere anxiolytica zoals meprobaat, hypnotica, sedatieve antidepressiva (bv. amitriptyline, doxepine, mianserine), sedatieve antihistaminica en neuroleptica zoals droperidol.

Naltrexon verhoogt de plasmaspiegel van acamprosaat.

## Bijlage D: Informatie over de verzekering

Voor iedereen die meedoet aan dit onderzoek, heeft de verrichter een verzekering afgesloten. De verzekering dekt schade door deelname aan het onderzoek. Dit geldt voor schade tijdens het onderzoek of binnen vier jaar na het einde van uw deelname aan het onderzoek. Schade moet u binnen die vier jaar aan de verzekeraar hebben gemeld.

De verzekering dekt niet alle schade. Onderaan deze tekst staat in het kort welke schade niet wordt gedekt.

Deze bepalingen staan in het Besluit verplichte verzekering bij medisch-wetenschappelijk onderzoek met mensen. Dit besluit staat op [www.ccmo.nl](http://www.ccmo.nl), de website van de Centrale Commissie Mensgebonden Onderzoek (zie 'Bibliotheek' en dan 'Wet- en regelgeving').

Bij schade kunt u direct contact leggen met de verzekeraar.

De verzekeraar van het onderzoek is:

Naam: CNA Insurance Company Limited

Adres: Polarisavenue 140, 2134 JX Hoofddorp

Telefoonnummer: +31(0)23-3036004, +31(0)638059413 ...

E-mail: [claimsnetherlands@cna Hardy.com](mailto:claimsnetherlands@cna Hardy.com) ...

De verzekering biedt een dekking van maximaal € 650.000 per proefpersoon en € 5.000.000 voor het hele onderzoek € 7.500.000 per jaar voor alle onderzoeken van dezelfde opdrachtgever.

De verzekering dekt de volgende schade **niet**:

- schade door een risico waarover u in de schriftelijke informatie bent ingelicht. Dit geldt niet als het risico zich ernstiger voordoet dan was voorzien of als het risico heel onwaarschijnlijk was;
- schade aan uw gezondheid die ook zou zijn ontstaan als u niet aan het onderzoek had meegedaan;
- schade door het niet (volledig) opvolgen van aanwijzingen of instructies;
- schade aan uw nakomelingen, als gevolg van een negatief effect van het onderzoek op u of uw nakomelingen;
- schade door een bestaande behandelmethodede bij onderzoek naar bestaande behandelmethoden.

## Bijlage E: Toestemmingsformulier proefpersoon

### Lage dosering Naltrexon voor het in remissie brengen van de ziekte van Crohn

- Ik heb de informatiebrief gelezen. Ook kon ik vragen stellen. Mijn vragen zijn voldoende beantwoord. Ik had genoeg tijd om te beslissen of ik meedoe.
- Ik weet dat meedoen vrijwillig is. Ook weet ik dat ik op ieder moment kan beslissen om toch niet mee te doen of te stoppen met het onderzoek. Daarvoor hoef ik geen reden te geven.
- Ik geef toestemming voor het informeren van mijn huisarts/behandelend specialist/apotheker op de hoogte wordt/worden gebracht dat ik meedoe aan dit onderzoek.
- Ik geef toestemming voor het verzamelen en gebruiken van mijn medische gegevens, bloedmonsters en lichaamsmateriaal voor de beantwoording van de onderzoeksvraag in dit onderzoek.
- Ik weet dat voor de controle van het onderzoek sommige mensen toegang tot al mijn gegevens kunnen krijgen. Die mensen staan vermeld in deze informatiebrief. Ik geef toestemming voor die inzage door deze personen.
- Ik geef toestemming voor het informeren van mijn huisarts en/of behandelend specialist van onverwachte bevindingen die van belang (kunnen) zijn voor mijn gezondheid.
- Ik weet dat ik niet zwanger mag worden tijdens het onderzoek
- Ik geef toestemming voor het verstrekken van mijn naam en adresgegevens middels een recept aan de apotheek van het Erasmus MC.
- Ik geef  **wel**  
 **geen**  
toestemming om mijn lichaamsmateriaal en persoonsgegevens na dit onderzoek te bewaren en om dit later nog voor toekomstig onderzoek te gebruiken, zoals in de informatiebrief staat.
- Ik wil meedoen aan dit onderzoek.

-----  
Naam proefpersoon:

Handtekening:

Datum: \_\_ / \_\_ / \_\_

-----  
Ik verklaar dat ik deze proefpersoon volledig heb geïnformeerd over het genoemde onderzoek. Als er tijdens het onderzoek informatie bekend wordt die de toestemming van de proefpersoon zou kunnen beïnvloeden, dan breng ik hem/haar daarvan tijdig op de hoogte.

Naam onderzoeker (of diens vertegenwoordiger):

Handtekening:

Datum: \_\_ / \_\_ / \_\_



SPIRIT 2013 Checklist: Recommended items to address in a clinical trial protocol and related documents\*

| Section/item                      | Item No | Description                                                                                                                                                                                                                                                                              | Addressed on page number |
|-----------------------------------|---------|------------------------------------------------------------------------------------------------------------------------------------------------------------------------------------------------------------------------------------------------------------------------------------------|--------------------------|
| <b>Administrative information</b> |         |                                                                                                                                                                                                                                                                                          |                          |
| Title                             | 1       | Descriptive title identifying the study design, population, interventions, and, if applicable, trial acronym                                                                                                                                                                             | ___ 1 ___                |
| Trial registration                | 2a      | Trial identifier and registry name. If not yet registered, name of intended registry                                                                                                                                                                                                     | ___ 1 & 6 ___            |
|                                   | 2b      | All items from the World Health Organization Trial Registration Data Set                                                                                                                                                                                                                 | _____                    |
| Protocol version                  | 3       | Date and version identifier                                                                                                                                                                                                                                                              | ___ 1&3 ___              |
| Funding                           | 4       | Sources and types of financial, material, and other support                                                                                                                                                                                                                              | ___ 1 ___                |
| Roles and responsibilities        | 5a      | Names, affiliations, and roles of protocol contributors                                                                                                                                                                                                                                  | ___ 1 ___                |
|                                   | 5b      | Name and contact information for the trial sponsor                                                                                                                                                                                                                                       | ___ 1 ___                |
|                                   | 5c      | Role of study sponsor and funders, if any, in study design; collection, management, analysis, and interpretation of data; writing of the report; and the decision to submit the report for publication, including whether they will have ultimate authority over any of these activities | ___ 1 ___                |
|                                   | 5d      | Composition, roles, and responsibilities of the coordinating centre, steering committee, endpoint adjudication committee, data management team, and other individuals or groups overseeing the trial, if applicable (see Item 21a for data monitoring committee)                         | _____                    |

|    |                                                           |     |                                                                                                               |               |
|----|-----------------------------------------------------------|-----|---------------------------------------------------------------------------------------------------------------|---------------|
| 1  | <b>Introduction</b>                                       |     |                                                                                                               |               |
| 2  |                                                           |     |                                                                                                               |               |
| 3  | Background and                                            | 6a  | Description of research question and justification for undertaking the trial, including summary of relevant   | _____ 3 _____ |
| 4  | rationale                                                 |     | studies (published and unpublished) examining benefits and harms for each intervention                        |               |
| 5  |                                                           |     |                                                                                                               |               |
| 6  |                                                           | 6b  | Explanation for choice of comparators                                                                         | _____ 3 _____ |
| 7  |                                                           |     |                                                                                                               |               |
| 8  | Objectives                                                | 7   | Specific objectives or hypotheses                                                                             | _____ 3 _____ |
| 9  |                                                           |     |                                                                                                               |               |
| 10 | Trial design                                              | 8   | Description of trial design including type of trial (eg, parallel group, crossover, factorial, single group), |               |
| 11 |                                                           |     | allocation ratio, and framework (eg, superiority, equivalence, noninferiority, exploratory)                   | _____ 3 _____ |
| 12 |                                                           |     |                                                                                                               |               |
| 13 |                                                           |     |                                                                                                               |               |
| 14 | <b>Methods: Participants, interventions, and outcomes</b> |     |                                                                                                               |               |
| 15 |                                                           |     |                                                                                                               |               |
| 16 | Study setting                                             | 9   | Description of study settings (eg, community clinic, academic hospital) and list of countries where data will | _____ 4 _____ |
| 17 |                                                           |     | be collected. Reference to where list of study sites can be obtained                                          |               |
| 18 |                                                           |     |                                                                                                               |               |
| 19 | Eligibility criteria                                      | 10  | Inclusion and exclusion criteria for participants. If applicable, eligibility criteria for study centres and  | _____ 4 _____ |
| 20 |                                                           |     | individuals who will perform the interventions (eg, surgeons, psychotherapists)                               |               |
| 21 |                                                           |     |                                                                                                               |               |
| 22 | Interventions                                             | 11a | Interventions for each group with sufficient detail to allow replication, including how and when they will be | _____ 5 _____ |
| 23 |                                                           |     | administered                                                                                                  |               |
| 24 |                                                           |     |                                                                                                               |               |
| 25 |                                                           | 11b | Criteria for discontinuing or modifying allocated interventions for a given trial participant (eg, drug dose  | _____ 6 _____ |
| 26 |                                                           |     | change in response to harms, participant request, or improving/worsening disease)                             |               |
| 27 |                                                           |     |                                                                                                               |               |
| 28 |                                                           | 11c | Strategies to improve adherence to intervention protocols, and any procedures for monitoring adherence        | _____ 5 _____ |
| 29 |                                                           |     | (eg, drug tablet return, laboratory tests)                                                                    |               |
| 30 |                                                           |     |                                                                                                               |               |
| 31 |                                                           | 11d | Relevant concomitant care and interventions that are permitted or prohibited during the trial                 | _____ 5 _____ |
| 32 |                                                           |     |                                                                                                               |               |
| 33 | Outcomes                                                  | 12  | Primary, secondary, and other outcomes, including the specific measurement variable (eg, systolic blood       | _____ 6 _____ |
| 34 |                                                           |     | pressure), analysis metric (eg, change from baseline, final value, time to event), method of aggregation (eg, |               |
| 35 |                                                           |     | median, proportion), and time point for each outcome. Explanation of the clinical relevance of chosen         |               |
| 36 |                                                           |     | efficacy and harm outcomes is strongly recommended                                                            |               |
| 37 |                                                           |     |                                                                                                               |               |
| 38 | Participant timeline                                      | 13  | Time schedule of enrolment, interventions (including any run-ins and washouts), assessments, and visits for   | _____ 5 _____ |
| 39 |                                                           |     | participants. A schematic diagram is highly recommended (see Figure)                                          |               |
| 40 |                                                           |     |                                                                                                               |               |
| 41 |                                                           |     |                                                                                                               |               |
| 42 |                                                           |     |                                                                                                               |               |
| 43 |                                                           |     |                                                                                                               |               |
| 44 |                                                           |     |                                                                                                               |               |
| 45 |                                                           |     |                                                                                                               |               |
| 46 |                                                           |     |                                                                                                               |               |

|   |             |    |                                                                                                                                                                                       |             |
|---|-------------|----|---------------------------------------------------------------------------------------------------------------------------------------------------------------------------------------|-------------|
| 1 | Sample size | 14 | Estimated number of participants needed to achieve study objectives and how it was determined, including clinical and statistical assumptions supporting any sample size calculations | _____6_____ |
| 2 |             |    |                                                                                                                                                                                       |             |
| 3 |             |    |                                                                                                                                                                                       |             |
| 4 | Recruitment | 15 | Strategies for achieving adequate participant enrolment to reach target sample size                                                                                                   | _____6_____ |
| 5 |             |    |                                                                                                                                                                                       |             |

### 6 **Methods: Assignment of interventions (for controlled trials)**

#### 7 Allocation:

|    |                                  |     |                                                                                                                                                                                                                                                                                                                                                          |             |
|----|----------------------------------|-----|----------------------------------------------------------------------------------------------------------------------------------------------------------------------------------------------------------------------------------------------------------------------------------------------------------------------------------------------------------|-------------|
| 8  |                                  |     |                                                                                                                                                                                                                                                                                                                                                          |             |
| 9  |                                  |     |                                                                                                                                                                                                                                                                                                                                                          |             |
| 10 | Sequence generation              | 16a | Method of generating the allocation sequence (eg, computer-generated random numbers), and list of any factors for stratification. To reduce predictability of a random sequence, details of any planned restriction (eg, blocking) should be provided in a separate document that is unavailable to those who enrol participants or assign interventions | _____6_____ |
| 11 |                                  |     |                                                                                                                                                                                                                                                                                                                                                          |             |
| 12 |                                  |     |                                                                                                                                                                                                                                                                                                                                                          |             |
| 13 |                                  |     |                                                                                                                                                                                                                                                                                                                                                          |             |
| 14 |                                  |     |                                                                                                                                                                                                                                                                                                                                                          |             |
| 15 |                                  |     |                                                                                                                                                                                                                                                                                                                                                          |             |
| 16 | Allocation concealment mechanism | 16b | Mechanism of implementing the allocation sequence (eg, central telephone; sequentially numbered, opaque, sealed envelopes), describing any steps to conceal the sequence until interventions are assigned                                                                                                                                                | _____6_____ |
| 17 |                                  |     |                                                                                                                                                                                                                                                                                                                                                          |             |
| 18 |                                  |     |                                                                                                                                                                                                                                                                                                                                                          |             |
| 19 |                                  |     |                                                                                                                                                                                                                                                                                                                                                          |             |
| 20 | Implementation                   | 16c | Who will generate the allocation sequence, who will enrol participants, and who will assign participants to interventions                                                                                                                                                                                                                                | _____6_____ |
| 21 |                                  |     |                                                                                                                                                                                                                                                                                                                                                          |             |
| 22 |                                  |     |                                                                                                                                                                                                                                                                                                                                                          |             |
| 23 |                                  |     |                                                                                                                                                                                                                                                                                                                                                          |             |
| 24 | Blinding (masking)               | 17a | Who will be blinded after assignment to interventions (eg, trial participants, care providers, outcome assessors, data analysts), and how                                                                                                                                                                                                                | _____6_____ |
| 25 |                                  |     |                                                                                                                                                                                                                                                                                                                                                          |             |
| 26 |                                  |     |                                                                                                                                                                                                                                                                                                                                                          |             |
| 27 |                                  | 17b | If blinded, circumstances under which unblinding is permissible, and procedure for revealing a participant's allocated intervention during the trial                                                                                                                                                                                                     | _____6_____ |
| 28 |                                  |     |                                                                                                                                                                                                                                                                                                                                                          |             |
| 29 |                                  |     |                                                                                                                                                                                                                                                                                                                                                          |             |
| 30 |                                  |     |                                                                                                                                                                                                                                                                                                                                                          |             |

### 31 **Methods: Data collection, management, and analysis**

|    |                         |     |                                                                                                                                                                                                                                                                                                                                                                                                              |             |
|----|-------------------------|-----|--------------------------------------------------------------------------------------------------------------------------------------------------------------------------------------------------------------------------------------------------------------------------------------------------------------------------------------------------------------------------------------------------------------|-------------|
| 32 |                         |     |                                                                                                                                                                                                                                                                                                                                                                                                              |             |
| 33 | Data collection methods | 18a | Plans for assessment and collection of outcome, baseline, and other trial data, including any related processes to promote data quality (eg, duplicate measurements, training of assessors) and a description of study instruments (eg, questionnaires, laboratory tests) along with their reliability and validity, if known. Reference to where data collection forms can be found, if not in the protocol | _____5_____ |
| 34 |                         |     |                                                                                                                                                                                                                                                                                                                                                                                                              |             |
| 35 |                         |     |                                                                                                                                                                                                                                                                                                                                                                                                              |             |
| 36 |                         |     |                                                                                                                                                                                                                                                                                                                                                                                                              |             |
| 37 |                         |     |                                                                                                                                                                                                                                                                                                                                                                                                              |             |
| 38 |                         |     |                                                                                                                                                                                                                                                                                                                                                                                                              |             |
| 39 |                         | 18b | Plans to promote participant retention and complete follow-up, including list of any outcome data to be collected for participants who discontinue or deviate from intervention protocols                                                                                                                                                                                                                    | _____5_____ |
| 40 |                         |     |                                                                                                                                                                                                                                                                                                                                                                                                              |             |
| 41 |                         |     |                                                                                                                                                                                                                                                                                                                                                                                                              |             |
| 42 |                         |     |                                                                                                                                                                                                                                                                                                                                                                                                              |             |



|    |                                 |     |                                                                                                                                                                                                                                                                                                                                       |             |
|----|---------------------------------|-----|---------------------------------------------------------------------------------------------------------------------------------------------------------------------------------------------------------------------------------------------------------------------------------------------------------------------------------------|-------------|
| 1  | Data management                 | 19  | Plans for data entry, coding, security, and storage, including any related processes to promote data quality (eg, double data entry; range checks for data values). Reference to where details of data management procedures can be found, if not in the protocol                                                                     | _____6_____ |
| 2  |                                 |     |                                                                                                                                                                                                                                                                                                                                       |             |
| 3  |                                 |     |                                                                                                                                                                                                                                                                                                                                       |             |
| 4  |                                 |     |                                                                                                                                                                                                                                                                                                                                       |             |
| 5  | Statistical methods             | 20a | Statistical methods for analysing primary and secondary outcomes. Reference to where other details of the statistical analysis plan can be found, if not in the protocol                                                                                                                                                              | _____7_____ |
| 6  |                                 |     |                                                                                                                                                                                                                                                                                                                                       |             |
| 7  |                                 |     |                                                                                                                                                                                                                                                                                                                                       |             |
| 8  |                                 | 20b | Methods for any additional analyses (eg, subgroup and adjusted analyses)                                                                                                                                                                                                                                                              | _____7_____ |
| 9  |                                 |     |                                                                                                                                                                                                                                                                                                                                       |             |
| 10 |                                 | 20c | Definition of analysis population relating to protocol non-adherence (eg, as randomised analysis), and any statistical methods to handle missing data (eg, multiple imputation)                                                                                                                                                       | _____       |
| 11 |                                 |     |                                                                                                                                                                                                                                                                                                                                       |             |
| 12 |                                 |     |                                                                                                                                                                                                                                                                                                                                       |             |
| 13 |                                 |     |                                                                                                                                                                                                                                                                                                                                       |             |
| 14 | <b>Methods: Monitoring</b>      |     |                                                                                                                                                                                                                                                                                                                                       |             |
| 15 |                                 |     |                                                                                                                                                                                                                                                                                                                                       |             |
| 16 | Data monitoring                 | 21a | Composition of data monitoring committee (DMC); summary of its role and reporting structure; statement of whether it is independent from the sponsor and competing interests; and reference to where further details about its charter can be found, if not in the protocol. Alternatively, an explanation of why a DMC is not needed | _____       |
| 17 |                                 |     |                                                                                                                                                                                                                                                                                                                                       |             |
| 18 |                                 |     |                                                                                                                                                                                                                                                                                                                                       |             |
| 19 |                                 |     |                                                                                                                                                                                                                                                                                                                                       |             |
| 20 |                                 |     |                                                                                                                                                                                                                                                                                                                                       |             |
| 21 |                                 |     |                                                                                                                                                                                                                                                                                                                                       |             |
| 22 |                                 | 21b | Description of any interim analyses and stopping guidelines, including who will have access to these interim results and make the final decision to terminate the trial                                                                                                                                                               | _____       |
| 23 |                                 |     |                                                                                                                                                                                                                                                                                                                                       |             |
| 24 |                                 |     |                                                                                                                                                                                                                                                                                                                                       |             |
| 25 | Harms                           | 22  | Plans for collecting, assessing, reporting, and managing solicited and spontaneously reported adverse events and other unintended effects of trial interventions or trial conduct                                                                                                                                                     | _____7_____ |
| 26 |                                 |     |                                                                                                                                                                                                                                                                                                                                       |             |
| 27 |                                 |     |                                                                                                                                                                                                                                                                                                                                       |             |
| 28 | Auditing                        | 23  | Frequency and procedures for auditing trial conduct, if any, and whether the process will be independent from investigators and the sponsor                                                                                                                                                                                           | _____       |
| 29 |                                 |     |                                                                                                                                                                                                                                                                                                                                       |             |
| 30 |                                 |     |                                                                                                                                                                                                                                                                                                                                       |             |
| 31 |                                 |     |                                                                                                                                                                                                                                                                                                                                       |             |
| 32 | <b>Ethics and dissemination</b> |     |                                                                                                                                                                                                                                                                                                                                       |             |
| 33 |                                 |     |                                                                                                                                                                                                                                                                                                                                       |             |
| 34 | Research ethics approval        | 24  | Plans for seeking research ethics committee/institutional review board (REC/IRB) approval                                                                                                                                                                                                                                             | _____7_____ |
| 35 |                                 |     |                                                                                                                                                                                                                                                                                                                                       |             |
| 36 |                                 |     |                                                                                                                                                                                                                                                                                                                                       |             |
| 37 | Protocol amendments             | 25  | Plans for communicating important protocol modifications (eg, changes to eligibility criteria, outcomes, analyses) to relevant parties (eg, investigators, REC/IRBs, trial participants, trial registries, journals, regulators)                                                                                                      | _____7_____ |
| 38 |                                 |     |                                                                                                                                                                                                                                                                                                                                       |             |
| 39 |                                 |     |                                                                                                                                                                                                                                                                                                                                       |             |
| 40 |                                 |     |                                                                                                                                                                                                                                                                                                                                       |             |
| 41 |                                 |     |                                                                                                                                                                                                                                                                                                                                       |             |
| 42 |                                 |     |                                                                                                                                                                                                                                                                                                                                       |             |

|    |                               |     |                                                                                                                                                                                                                                                                                     |             |
|----|-------------------------------|-----|-------------------------------------------------------------------------------------------------------------------------------------------------------------------------------------------------------------------------------------------------------------------------------------|-------------|
| 1  | Consent or assent             | 26a | Who will obtain informed consent or assent from potential trial participants or authorised surrogates, and how (see Item 32)                                                                                                                                                        | _____4_____ |
| 2  |                               |     |                                                                                                                                                                                                                                                                                     |             |
| 3  |                               |     |                                                                                                                                                                                                                                                                                     |             |
| 4  |                               | 26b | Additional consent provisions for collection and use of participant data and biological specimens in ancillary studies, if applicable                                                                                                                                               | _____       |
| 5  |                               |     |                                                                                                                                                                                                                                                                                     |             |
| 6  |                               |     |                                                                                                                                                                                                                                                                                     |             |
| 7  | Confidentiality               | 27  | How personal information about potential and enrolled participants will be collected, shared, and maintained in order to protect confidentiality before, during, and after the trial                                                                                                | _____       |
| 8  |                               |     |                                                                                                                                                                                                                                                                                     |             |
| 9  |                               |     |                                                                                                                                                                                                                                                                                     |             |
| 10 | Declaration of interests      | 28  | Financial and other competing interests for principal investigators for the overall trial and each study site                                                                                                                                                                       | _____9_____ |
| 11 |                               |     |                                                                                                                                                                                                                                                                                     |             |
| 12 |                               |     |                                                                                                                                                                                                                                                                                     |             |
| 13 | Access to data                | 29  | Statement of who will have access to the final trial dataset, and disclosure of contractual agreements that limit such access for investigators                                                                                                                                     | _____9_____ |
| 14 |                               |     |                                                                                                                                                                                                                                                                                     |             |
| 15 |                               |     |                                                                                                                                                                                                                                                                                     |             |
| 16 | Ancillary and post-trial care | 30  | Provisions, if any, for ancillary and post-trial care, and for compensation to those who suffer harm from trial participation                                                                                                                                                       | _____7_____ |
| 17 |                               |     |                                                                                                                                                                                                                                                                                     |             |
| 18 |                               |     |                                                                                                                                                                                                                                                                                     |             |
| 19 |                               |     |                                                                                                                                                                                                                                                                                     |             |
| 20 | Dissemination policy          | 31a | Plans for investigators and sponsor to communicate trial results to participants, healthcare professionals, the public, and other relevant groups (eg, via publication, reporting in results databases, or other data sharing arrangements), including any publication restrictions | _____       |
| 21 |                               |     |                                                                                                                                                                                                                                                                                     |             |
| 22 |                               |     |                                                                                                                                                                                                                                                                                     |             |
| 23 |                               |     |                                                                                                                                                                                                                                                                                     |             |
| 24 |                               | 31b | Authorship eligibility guidelines and any intended use of professional writers                                                                                                                                                                                                      | _____       |
| 25 |                               |     |                                                                                                                                                                                                                                                                                     |             |
| 26 |                               | 31c | Plans, if any, for granting public access to the full protocol, participant-level dataset, and statistical code                                                                                                                                                                     | _____9_____ |
| 27 |                               |     |                                                                                                                                                                                                                                                                                     |             |
| 28 |                               |     |                                                                                                                                                                                                                                                                                     |             |
| 29 | <b>Appendices</b>             |     |                                                                                                                                                                                                                                                                                     |             |
| 30 |                               |     |                                                                                                                                                                                                                                                                                     |             |
| 31 | Informed consent materials    | 32  | Model consent form and other related documentation given to participants and authorised surrogates                                                                                                                                                                                  | _____       |
| 32 |                               |     |                                                                                                                                                                                                                                                                                     |             |
| 33 |                               |     |                                                                                                                                                                                                                                                                                     |             |
| 34 | Biological specimens          | 33  | Plans for collection, laboratory evaluation, and storage of biological specimens for genetic or molecular analysis in the current trial and for future use in ancillary studies, if applicable                                                                                      | _____       |
| 35 |                               |     |                                                                                                                                                                                                                                                                                     |             |
| 36 |                               |     |                                                                                                                                                                                                                                                                                     |             |

\*It is strongly recommended that this checklist be read in conjunction with the SPIRIT 2013 Explanation & Elaboration for important clarification on the items. Amendments to the protocol should be tracked and dated. The SPIRIT checklist is copyrighted by the SPIRIT Group under the Creative Commons [“Attribution-NonCommercial-NoDerivs 3.0 Unported”](https://creativecommons.org/licenses/by-nc-nd/3.0/) license.
