# Supplementary material for: Low-dose naltrexone for the induction of remission in patients with mild to moderate Crohn’s disease: protocol for the randomised, double-blinded, placebo-controlled, multicentre LDN Crohn study
Source: PubMed Central journal article supplement — BMJ Open. 2022 Apr 8;12(4):e058358. doi: 10.1136/bmjopen-2021-058358 (PMC8996009; doi:10.1136/bmjopen-2021-058358), 2022-04-08
Supplement: bmjopen-2021-058358supp001.pdf [file bmjopen-2021-058358supp001.pdf]

Proefpersoneninformatie

# Proefpersoneninformatie voor deelname aan medisch-wetenschappelijk onderzoek

## Naltrexon in lage dosering voor het in remissie brengen van de ziekte van Crohn

Officiële titel: Lage dosering Naltrexon voor inductie van remissie bij patiënten met een milde tot matige vorm van de ziekte van Crohn, waarbij de standaardtherapie onvoldoende werkt of teveel bijwerkingen geeft.

### Inleiding

Geachte heer/mevrouw,

Wij vragen u vriendelijk om mee te doen aan een medisch-wetenschappelijk onderzoek. Meedoen is vrijwillig. Om deel te nemen aan het onderzoek is wel uw schriftelijke toestemming nodig. U ontvangt deze brief omdat u de ziekte van Crohn heeft waarbij u onvoldoende effect ondervindt van uw huidige medicijnen of teveel last heeft van bijwerkingen. Voordat u beslist of u wil meedoen aan dit onderzoek, krijgt u uitleg over wat het onderzoek inhoudt. Lees deze informatie rustig door en vraag de onderzoeker uitleg als u vragen heeft. U kunt ook de onafhankelijk deskundige, die aan het eind van deze brief genoemd wordt, om aanvullende informatie vragen. Zie bijlage A voor contactgegevens. U kunt er ook over praten met uw partner, vrienden of familie. Verdere informatie over meedoen aan zo'n onderzoek staat in de bijgevoegde brochure 'Medisch-wetenschappelijk onderzoek'.

### 1. Algemene informatie

Dit onderzoek is opgezet door de afdeling Maag-, Darm- en Leverziekten van het Erasmus Medisch Centrum en wordt gedaan door artsen in meer dan 10 verschillende ziekenhuizen. Voor dit onderzoek zijn in totaal ruim 122 deelnemers nodig. De medisch-ethische toetsingscommissie van het Erasmus Medisch Centrum heeft dit onderzoek goedgekeurd. Algemene informatie over de toetsing van onderzoek vindt u in de brochure 'Medisch-wetenschappelijk onderzoek'.

### 2. Doel van het onderzoek

Het doel van het onderzoek is uitzoeken of een lage dosis naltrexon (LDN) de ziekte van Crohn in remissie kan brengen wanneer de huidige behandeling onvoldoende effect heeft of teveel bijwerkingen geeft. Tevens kijken we of het middel effect heeft op moeheid en stemming. Het is de bedoeling om de gevonden resultaten te publiceren.

Proefpersoneninformatie

### 3. Achtergrond van het onderzoek

De ziekte van Crohn behoort samen met colitis ulcerosa tot de groep Inflammatoire darmziekten (IBD). Deze ontstekingsziekten van de darm gaan gepaard met afwisselend rustige en actieve ziekteperiodes. De behandeling bestaat onder andere uit medicatie om de symptomen te verminderen en de ontsteking tot rust te brengen. De huidige behandeling van een patiënt met een milde ziekte van Crohn (CD) start in het algemeen met corticosteroiden. Hierna worden vaak als onderhoudsmedicatie immunosuppressiva gegeven, meestal thiopurines. Bij een groot deel van de patiënten is de ziekte met deze medicijnen goed onder controle. Echter bij een gedeelte van de patiënten is een vervolg stap naar biologische medicatie nodig.

Uit enkele kleine onderzoeken komt naar voren dat het medicijn Naltrexon (LDN), in lage doseringen, mogelijk ook gebruikt kan worden om de ziekte rustig te houden. Naltrexon heeft een gunstiger bijwerkingen profiel dan de biologische medicatie. Deze studie vergelijkt de werking van Naltrexon in lage dosering met een placebo, voor het in remissie brengen van de ziekte van Crohn. Tevens wordt er gekeken of Naltrexon effect heeft op moeheid en stemming. Het onderzoek wordt uitgevoerd in meer dan 10 ziekenhuizen in Nederland.

### 4. Wat meedoen inhoudt

Als u meedoet duurt dat 3 maanden. Indien u hierna door wil gaan met het onderzoek om te kijken of Naltrexon ook werkt als onderhoudsmiddel duurt het tot maximaal een jaar.

#### Geschiktheidsonderzoek

Eerst bepalen we of u mee kunt doen aan het onderzoek. Uw behandelend arts meet de ziekteactiviteit van uw darmziekte door te vragen naar uw klachten en een onderzoek in de ontlasting te doen. Tevens bekijkt hij de darm vanbinnen door middel van een coloscopie. Ook vragen we naar uw medische voorgeschiedenis en medicijngebruik.

#### Opzet van het onderzoek

Om het effect van lage dosering Naltrexon optimaal te onderzoeken wordt het vergeleken met het gebruik van een niet werkzaam middel, ook wel placebo. U wordt gerandomiseerd voor één van beide middelen, wat inhoudt dat het door loting wordt bepaald welk middel u gaat gebruiken. U en de onderzoekers weten tijdens het onderzoek niet welk middel u gebruikt.

#### Bezoeken en metingen

Voor het onderzoek is het nodig dat u meerdere keren naar het ziekenhuis komt, namelijk 2 keer op (ongeveer) de volgende momenten: week 4 en 12. Indien u ervoor kiest ook in week 24 en 52.

Tijdens de ziekenhuisbezoeken zal het volgende gebeuren:

- Bloedafname – elk poliklinisch bezoek, hierin meten we de bloedcellen en ontstekingswaarden

#### Proefpersoneninformatie

- Inleveren ontlasting – poliklinisch bezoek week 12, hierin meten we ontstekingswaarden
- Vragenlijsten invullen – poliklinisch bezoek, hierbij krijgt u vragen over uw klachten en kwaliteit van leven. Het invullen kost ongeveer 20 minuten.
- Coloscopie – dit gebeurt voorafgaand aan de studie, in week 12 en indien u ervoor kiest in week 52.

Tijdens 2 telefonische afspraken vragen wij of u last heeft van bijwerkingen en nemen we een korte vragenlijst af om de ziekte activiteit te scoren. Dit duurt 10 min.

#### Anders dan bij gebruikelijke zorg

Normaal komt u misschien één keer in de 3 of 6 maanden bij uw arts voor controle van uw Crohn. De bezoeken die bij dit onderzoek horen, komen in plaats van normale bezoeken. Vanzelfsprekend geeft u het zelf aan wanneer het niet goed met u gaat, zodat een extra afspraak gepland zal worden.

In bijlage B vindt u alle informatie die u nodig heeft over de onderzoeksbehandeling en de procedures van het onderzoek.

### 5. Wat wordt er van u verwacht

Om het onderzoek goed te laten verlopen en voor uw eigen veiligheid, is het belangrijk dat u zich aan de volgende afspraken houdt. Naast de hieronder genoemde, kunnen er nog andere regels zijn die uw onderzoekarts met u zal doornemen;

De afspraken zijn dat u:

- De medicijnen inneemt.
- Afspraken voor bezoeken nakomt;
- Niet ook nog aan een ander medisch-wetenschappelijk onderzoek meedoet;
- Alles vertelt aan uw onderzoekarts wat u weet over uw gezondheid en de medicijnen die u nu inneemt of mee begint tijdens het onderzoek. Bepaalde geneesmiddelen mogen niet gebruikt worden tijdens uw deelname aan het onderzoek. Als u dat niet doet, brengt u mogelijk uw eigen gezondheid in gevaar;
- Niet zwanger bent, wordt of borstvoeding geeft tijdens dit onderzoek. Overleg met uw arts over geschikte voorbehoedsmiddelen;
- De behandeling dient te onderbreken in overleg met u en de begeleidend onderzoekarts. Dit kan gebeuren als u symptomen heeft van een infectie, afwijkende bloedresultaten of een operatie moet ondergaan. Geef dit dan ook zo snel mogelijk door aan uw arts;

Het is belangrijk dat u contact opneemt met de onderzoeker:

- voordat u andere geneesmiddelen gaat gebruiken. Ook als dat homeopathische geneesmiddelen, natuurgeneesmiddelen, vitaminen en/of geneesmiddelen van de drogist zijn;
- als u in een ziekenhuis wordt opgenomen of behandeld;

#### Proefpersoneninformatie

- als u plotseling gezondheidsklachten krijgt;
- als u zwanger wordt;
- als u niet meer wilt meedoen aan het onderzoek;
- als uw contactgegevens wijzigen.

## 6. Mogelijke risico's van deelname aan dit onderzoek

Elk geneesmiddel kan bijwerkingen geven of onvoorziene reacties veroorzaken. Bovendien kan iedere patiënt anders reageren op dezelfde dosering van het hetzelfde geneesmiddel. Het is mogelijk dat het geneesmiddel dat u gebruikt uw aandoening, de ziekte van Crohn, niet doeltreffend onder controle brengt.

### Bijwerkingen

Lees aandachtig bijlage C door met meer uitgebreide informatie over bijwerkingen en risico's. Doet u mee aan het onderzoek? Dan krijgt u de bijsluiter mee met het middel.

### Bloedafnames

Bloedafnames kunnen pijn doen of een bloeditstorting geven. Alles bij elkaar nemen we maximaal 4 buisjes bloed af tijdens de eerste 3 maanden van de studie, wat neerkomt op 34 ml bloed in totaal. Deze hoeveelheid geeft bij volwassenen geen problemen. Ter vergelijking: bij de bloedbank wordt 500 ml bloed per keer afgenomen. U kunt een gevoel van flauwte ervaren tijdens afname. Tijdens een bloedafname kan een prikaccident optreden, een verwonding met een naald waarbij het mogelijk is dat de persoon besmet raakt met een bloed overdraagbare aandoening zoals een virus. Ook een infectie is een mogelijk risico.

### Zwangerschap

Vrouwen die zwanger zijn of borstvoeding geven, kunnen niet meedoen aan dit onderzoek. Ook mogen vrouwen niet zwanger worden tijdens het onderzoek. De onderzoeker kan met u over geschikte voorbehoedsmiddelen praten. Vertel het uw arts onmiddellijk als u zwanger raakt.

## 7. Mogelijke voor- en nadelen

Het is belangrijk dat u de mogelijke voor- en nadelen goed afweegt voordat u besluit mee te doen. Naltrexon kan de ontstekingsactiviteit in de darmen verminderen, maar zeker is dat niet. Ieder individu reageert verschillend.

Nadelen van meedoen aan het onderzoek kunnen zijn:

- mogelijke bijwerkingen;
- mogelijke ongemakken van de metingen in het onderzoek.

#### Proefpersoneninformatie

Deelname aan het onderzoek betekent ook:

- dat u extra tijd kwijt bent;
- dat extra testen afgenomen worden;
- dat u afspraken heeft waaraan u zich moet houden.

Al deze zaken zijn hiervoor onder punt 4, 5 en 6 beschreven.

### **8. Als u niet wilt meedoen of wilt stoppen met het onderzoek**

U beslist zelf of u meedoet aan het onderzoek. Deelname is vrijwillig. Als u niet wil meedoen, wordt u op de gebruikelijke manier behandeld voor uw ziekte van Crohn. Uw arts kan u meer vertellen over de behandelingsmogelijkheden die er zijn en de voor- en nadelen daarvan.

Als u wel meedoet, kunt u zich altijd bedenken en toch stoppen, ook tijdens het onderzoek. U wordt dan weer op de gebruikelijke manier behandeld voor uw ziekte van Crohn. U hoeft niet te zeggen waarom u stopt. Wel moet u dit direct melden aan de onderzoeker. De gegevens die tot dat moment zijn verzameld, worden gebruikt voor het onderzoek.

Als er nieuwe informatie over het onderzoek is die belangrijk voor u is, laat de onderzoeker dit aan u weten. U wordt dan gevraagd of u blijft meedoen.

### **9. Einde van het onderzoek**

Uw deelname aan het onderzoek stopt als

- alle bezoeken volgens het schema (bijlage B) zijn voltooid;
- het einde van het hele onderzoek is bereikt;
- u zelf kiest om te stoppen;
- u zwanger wordt;
- de onderzoeker het beter voor u vindt om te stoppen;
- de overheid of de beoordelende medisch-ethische toetsingscommissie, besluit om het onderzoek te stoppen.

Het hele onderzoek is afgelopen als alle deelnemers klaar zijn. De medicatie die u gebruikt heeft bij het onderzoek, is ook beschikbaar na afloop van het onderzoek aangezien het om in Nederland geregistreerde medicijnen gaat. De onderzoeker zal met u praten over de mogelijkheden voor verdere medische zorg.

Na het verwerken van alle gegevens informeert de onderzoeker u over de belangrijkste uitkomsten van het onderzoek. Dit gebeurt ongeveer 2 jaar na uw deelname.

### **10. Gebruik en bewaren van uw gegevens en lichaamsmateriaal**

Voor dit onderzoek worden uw persoonsgegevens en lichaamsmateriaal verzameld, gebruikt en bewaard. Het gaat om gegevens zoals uw naam, geboortedatum en om gegevens over uw gezondheid waarvoor we uw elektronisch patiëntendossier inzien.

#### Proefpersoneninformatie

Voor dit onderzoek is bloed en ontlasting nodig. Het verzamelen, gebruiken en bewaren van uw gegevens en uw lichaamsmateriaal is nodig om de vragen die in dit onderzoek worden gesteld te kunnen beantwoorden en de resultaten te kunnen publiceren. Wij vragen voor het gebruik van uw gegevens en lichaamsmateriaal uw toestemming.

#### **Vertrouwelijkheid van uw gegevens en lichaamsmateriaal**

Om uw privacy te beschermen krijgen uw gegevens en uw lichaamsmateriaal een code. Uw naam en andere gegevens die u direct kunnen identificeren worden daarbij weggelaten. Alleen met de sleutel van de code zijn gegevens tot u te herleiden. De sleutel van de code blijft veilig opgeborgen in de lokale onderzoeksinstelling. De gegevens en lichaamsmateriaal die naar de onderzoeker worden gestuurd bevatten alleen de code, maar niet uw naam of andere gegevens waarmee u kunt worden geïdentificeerd. Ook in rapporten en publicaties over het onderzoek zijn de gegevens niet tot u te herleiden. Indien uw ziekenhuis gebruik maakt van het verzenden van studiemedicatie naar uw huisadres, worden uw naam en adresgegevens wel doorgegeven aan de apotheek van het Erasmus MC door middel van het voorgeschreven recept. U kunt hiervoor akkoord geven op het toestemmingsformulier.

#### **Toegang tot uw gegevens voor controle**

De onderzoekers kunnen op de onderzoekslocatie toegang krijgen tot al uw gegevens. Ook tot de gegevens zonder code. Dit is nodig om te kunnen controleren of het onderzoek goed en betrouwbaar is uitgevoerd. Personen die ter controle inzage krijgen in uw gegevens zijn de commissie die de veiligheid van het onderzoek in de gaten houdt, een monitor die door de onderzoeker is ingehuurd en de Inspectie Gezondheidszorg en Jeugd. Zij houden uw gegevens geheim. Wij vragen u voor deze inzage toestemming te geven.

#### **Bewaartermijn gegevens en lichaamsmateriaal voor dit onderzoek**

Uw gegevens moeten 15 jaar worden bewaard op de onderzoekslocatie na het beëindigen van de studie. Het wordt bewaard om daarop in de loop van dit onderzoek nog nieuwe bepalingen te kunnen doen die te maken hebben met dit onderzoek.

#### **Bewaren en gebruik van gegevens en lichaamsmateriaal voor ander onderzoek**

Uw gegevens en lichaamsmateriaal kunnen na afloop van dit onderzoek ook nog van belang zijn voor ander wetenschappelijk onderzoek op het gebied van de ziekte van Crohn. U kunt op het toestemmingsformulier aangeven of u hier wel of niet mee instemt. Indien u hier niet mee instemt, kunt u gewoon deelnemen aan het huidige onderzoek.

#### **Informatie over onverwachte bevindingen**

Tijdens dit onderzoek kan er bij toeval iets gevonden worden dat niet van belang is voor het onderzoek maar wel voor u. Als dit belangrijk is voor uw gezondheid, dan zult u op de hoogte worden gesteld door uw behandelend arts of de arts-onderzoeker. U kunt dan met uw huisarts of specialist bespreken wat er gedaan moet worden. Ook hiervoor geeft u toestemming.

Proefpersoneninformatie

### **Intrekken toestemming**

U kunt uw toestemming voor gebruik van uw persoonsgegevens altijd weer intrekken. Dit geldt voor dit onderzoek en ook voor het bewaren en het gebruik voor het toekomstige onderzoek. De onderzoeksgegevens die zijn verzameld tot het moment dat u uw toestemming intrekt worden nog wel gebruikt in het onderzoek. Uw lichaamsmateriaal wordt na intrekking van uw toestemming vernietigd. Als er al metingen met dat lichaamsmateriaal zijn gedaan, dan worden die gegevens nog wel gebruikt.

### **Meer informatie over uw rechten bij verwerking van gegevens**

Voor algemene informatie over uw rechten bij verwerking van uw persoonsgegevens kunt u de website van de Autoriteit Persoonsgegevens raadplegen: [www.erasmusmc.nl/cs-patientenzorg/372137/379076/bescherming.persoonsgegevens](http://www.erasmusmc.nl/cs-patientenzorg/372137/379076/bescherming.persoonsgegevens)

Bij vragen over uw rechten kunt u contact opnemen met de verantwoordelijke voor de verwerking van uw persoonsgegevens. Voor dit onderzoek is dat: *Erasmus Medisch Centrum*. Zie bijlage A voor contactgegevens.

Bij vragen of klachten over de verwerking van uw persoonsgegevens raden we u aan eerst contact op te nemen met de onderzoekslocatie. U kunt ook contact opnemen met de Functionaris voor de Gegevensbescherming van de instelling of de Autoriteit Persoonsgegevens, tevens opgenomen in bijlage A.

### **Registratie van het onderzoek**

Informatie over dit onderzoek is ook opgenomen in een overzicht van medisch-wetenschappelijke onderzoeken ([www.trialregister.nl](http://www.trialregister.nl)). Op deze site zijn geen gegevens opgenomen die naar u herleidbaar zijn. Na het onderzoek kan de website een samenvatting van de resultaten van dit onderzoek tonen.

## **11. Verzekering voor proefpersonen**

Voor iedereen die meedoet aan dit onderzoek is een verzekering afgesloten. De verzekering dekt schade door het onderzoek. Niet alle schade is gedekt. In bijlage D vindt u meer informatie over de verzekering en de uitzonderingen. Daar staat ook aan wie u schade kunt melden.

## **12. Informeren huisarts, behandelend specialist en apotheker**

Wij laten uw huisarts weten dat u meedoet aan het onderzoek. Het is ook mogelijk dat wij andere medisch specialisten waarbij u onder behandeling bent informeren over uw deelname aan dit onderzoek indien nodig. Dit is voor uw eigen veiligheid. Als u dit niet goed vindt, kunt u niet meedoen aan dit onderzoek. Als u geen huisarts heeft, kunt u niet deelnemen aan het onderzoek.

Proefpersoneninformatie

### **13. Vergoeding voor meedoen**

De studiemedicatie, extra testen en behandeling voor het onderzoek kosten u niets. U wordt niet betaald voor het meedoen aan dit onderzoek. Bezoeken aan een arts, andere behandelingen of tests die geen deel uitmaken van dit onderzoek worden niet betaald.

### **14. Heeft u vragen?**

Bij vragen kunt u contact opnemen met de onderzoeker. Voor onafhankelijk advies over meedoen aan dit onderzoek kunt u terecht bij de onafhankelijke arts. Hij weet veel over het onderzoek, maar heeft niets te maken met dit onderzoek.

Indien u klachten heeft over het onderzoek, kunt u dit bespreken met de onderzoeker of uw behandelend arts. Wilt u dit liever niet, dan kunt u zich wenden tot de klachtenfunctionaris/klachtencommissie.

Alle gegevens vindt u in bijlage A: Contactgegevens.

### **15. Ondertekening toestemmingsformulier**

Wanneer u voldoende bedenktijd heeft gehad, wordt u gevraagd te beslissen over deelname aan dit onderzoek. Indien u toestemming geeft, zullen wij u vragen deze op de bijbehorende toestemmingsverklaring schriftelijk te bevestigen. Door uw schriftelijke toestemming geeft u aan dat u de informatie heeft begrepen en instemt met deelname aan het onderzoek.

Zowel uzelf als de onderzoeker ontvangen een getekende versie van deze toestemmingsverklaring.

Dank voor uw aandacht.

Proefpersoneninformatie

## 16. Bijlagen bij deze informatie

- A. Contactgegevens
- B. Onderzoeks- en behandelingsprocedures
- C. Bijwerkingen en risico's
- D. Informatie over de verzekering
- E. Toestemmingsformulier proefpersoon
- F. Brochure 'Medisch-wetenschappelijk onderzoek. Algemene informatie voor de proefpersoon' (2017)

Proefpersoneninformatie

## **Bijlage A: Contactgegevens Erasmus MC**

Als u vragen hebt over uw deelname aan dit onderzoek of uw rechten als deelnemer aan een onderzoek, of als u problemen of klachten heeft betreffende deelname aan het onderzoek, kunt u contact opnemen met de onderzoeksarts.

### Arts-onderzoeker:

drs. E. Paulides, Afdeling Maag-, Darm- en Leverziekten

Email adres: [e.paulides@erasmusmc.nl](mailto:e.paulides@erasmusmc.nl)

Hoofdonderzoeker: professor dr C.J. van der Woude. U kunt haar bereiken via arts-onderzoeker E. Paulides of via het secretariaat 010 7031693.

Centraal nummer Erasmus Medisch Centrum.

Telefoonnummer: 010 - 704 07 04

### Onafhankelijk deskundige

Als u zich zorgen maakt over uw deelname, kunt u een persoon raadplegen die niet betrokken is bij het onderzoek maar wel deskundige is op het gebied van dit onderzoek.

Dr. R.J. de Knecht, telefoonnummer secretaresse: 010 - 7035942

### Klachten

Als u niet tevreden bent over het onderzoek, kunt u terecht bij de onafhankelijke klachtencommissie van het Erasmus MC.

Telefoonnummer: 010 – 703 31 98

### Bescherming persoonsgegevens

Heeft u vragen of opmerkingen over de bescherming van uw privacy?

Neem dan contact op met de functionaris gegevensbescherming (FG) van het Erasmus MC

<https://www.erasmusmc.nl/nl-nl/patientenzorg/privacy>

E-mail [functionaris.gegevensbescherming@erasmusmc.nl](mailto:functionaris.gegevensbescherming@erasmusmc.nl)

Telefoonnummer: 010 – 703 49 86

Proefpersoneninformatie

## Bijlage B: Onderzoeksbehandeling en –procedures

### Inductie- en onderhoudsbehandeling

De behandeling tijdens de eerste 12 weken wordt de 'inductiebehandeling' genoemd. Het doel van de inductiebehandeling is de ontsteking in de darm tot rust te brengen. Daarna start de onderhoudsbehandeling, met als doel het voorkomen van nieuwe opvlammingen van uw ziekte van Crohn.

#### Week 0 t-m 12: inductiebehandeling

- Naltrexon 4.5 mg éénmaal daags of placebo. U en de onderzoekers weten niet welk middel u gedurende deze periode gebruikt.
- Als u corticosteroiden gebruikt worden deze rustig afgebouwd.

#### Week 12 t-m 52: onderhoudsbehandeling

- U kunt na 12 weken kiezen om het medicijn Naltrexon te gebruiken tot week 52, om de effecten op langere termijn te onderzoeken. U en de onderzoekers weten dan tijdens deze periode wel dat u het middel Naltrexon gebruikt. Wat u tijdens de eerste 12 weken heeft gebruikt blijft onbekend.

Als iets voorvalt waardoor de volledige dosis niet kan worden ingenomen of als u vragen of zorgen heeft over het geneesmiddel, neem dan onmiddellijk contact op met uw onderzoekscentrum voor verdere instructies.

| Bezoeken of metingen                    | Beschrijving                                                                                                                                             |
|-----------------------------------------|----------------------------------------------------------------------------------------------------------------------------------------------------------|
| Lichamelijk onderzoek vitale parameters | Tijdens onderzoeksbezoeken zal alleen een specifiek lichamelijk onderzoek plaatsvinden op indicatie, gebaseerd op uw symptomen.                          |
| Ontlasting inleveren                    | Bij het polibezoek van week 12 wordt u gevraagd ontlasting in een potje op te vangen. Dit potje kunt u inleveren bij de arts/onderzoeker of bloedafname. |
| Vragenlijsten                           | Als u het ziekenhuis bezoekt of een telefonische afspraak heeft wordt u gevraagd om online vragenlijsten in te vullen over uw algehele welzijn.          |
| Endoscopie                              | Bij voorkeur wordt er een kijkonderzoek van de darm uitgevoerd om de ziekteactiviteit in de darm te observeren na 12 weken en eventueel na 52 weken.     |

Denk eraan dat het mogelijk is dat we u vragen een procedure of test te herhalen als uw onderzoeksarts van mening is dat dit nodig is om uw aandoening te evalueren.

## Proefpersoneninformatie

| Onderzoeks-procedures                                                       | Geschiktheids-onderzoek | Inductiebehandeling |        |         |         |         | Onderhoudsbehandeling |         |         |
|-----------------------------------------------------------------------------|-------------------------|---------------------|--------|---------|---------|---------|-----------------------|---------|---------|
|                                                                             | Screening               | Week 0              | Week 2 | Week 4* | Week 8* | Week 12 | Week 24               | Week 36 | Week 52 |
| Poliklinisch bezoek                                                         | X                       |                     |        | X       |         | X       | X                     |         | X       |
| Telefonisch consult                                                         |                         | X                   | X      |         | X       |         |                       | X       |         |
| Medische voorgeschiedenis                                                   | X                       |                     |        |         |         |         |                       |         |         |
| Lichamelijk onderzoek <sup>a</sup>                                          | (X)                     |                     |        |         |         |         |                       |         |         |
| Medicijngebruik                                                             | X                       |                     | X      | X       | X       | X       | X                     | X       | X       |
| Bloedonderzoek <sup>b</sup>                                                 | X                       |                     |        | X       |         | X       | X                     |         | X       |
| Ontlastingsmonster <sup>c</sup>                                             | X                       |                     |        |         |         | X       | X                     |         | X       |
| Vragenlijst ziekteactiviteit <sup>d</sup>                                   | X                       |                     | X      | X       | X       | X       | X                     | X       | X       |
| Vragenlijst kwaliteit van leven, gezondheid, moeheid, stemming <sup>e</sup> | X                       |                     |        | X       |         | X       | X                     |         | X       |
| Coloscopie <sup>f</sup>                                                     | X                       |                     |        |         |         | X       |                       |         | (X)     |

a Lichamelijk onderzoek kan omvatten lengte, gewicht, vitale functies, onderzoek van de buik en zo nodig hart en longen

b In het bloed worden bloedcellen en ontstekingswaarden onderzocht

c In de stoelgang wordt het stofje fecaal calprotectine (FCP) gemeten ter beoordeling van de ziekteactiviteit van uw darmziekte

d Hierbij wordt door middel van enkele vragen de ziekteactiviteit gemeten

e Er wordt 1 vragenlijst afgenomen over de ziekteactiviteit, 1 over uw kwaliteit van leven, 2 over algemene gezondheid, 2 over moeheid en 3 over stemming.

f Bij voorkeur wordt er een kijkonderzoek van de darm uitgevoerd om de ziekteactiviteit in de darm te observeren

Proefpersoneninformatie

## Bijlage C: Bijwerkingen en risico's

### Bijwerkingen

De medicatie wordt in een hele lage dosering voorgeschreven, maar kan in theorie bijwerkingen geven. In eerdere studies met kleine aantallen patiënten werden de volgende bijwerkingen genoemd: levendige dromen, slaperigheid, hoofdpijn.

Tekenen van allergische reacties kunnen zijn: beklemmend gevoel op de borst, piepende ademhaling, ernstige duizeligheid of een licht gevoel in het hoofd, zwellingen van de lippen, tong of keel, jeuk of huiduitslag. Neem direct contact op met uw huisarts en breng de arts-onderzoeker op de hoogte.

Bij hoge dosering Naltrexon komen de volgende bijwerkingen *zeer vaak* voor (1 op de 10 mensen): hoofdpijn, slaapstoornissen, onrust, nervositeit, angst, buikpijn, buikkrampen, misselijkheid, braken, gewrichtspijn, spierpijn, lichaamsszwakte.

Bij hoge dosering Naltrexon komen de volgende bijwerkingen *vaak* voor (1 op de 10 mensen): verminderde eetlust, diarree, obstipatie, dorst, koude rillingen, verhoogde energie, prikkelbaarheid, stemmingswisselingen, affectiestoornis, duizeligheid, huiduitslag, vertraagde ejaculatie, erectiele disfunctie, snelle hartslag, hartkloppingen, pijn in borstkas, verandering in hartfilmpje, toegenomen transpiratie, verhoogde traanproductie, urineretentie.

### Interacties met andere geneesmiddelen

Het wordt afgeraden om gelijktijdig geneesmiddelen te gebruiken die opioïden bevatten. Combinatie met middelen die toxisch zijn voor de lever vermijden. Vermijd zo mogelijk combinatie met centraal werkende medicatie bij hoge bloeddruk zoals alfa-methyldopa.

Wees voorzichtig met combineren met de volgende middelen: barbituraten, benzodiazepinen, andere anxiolytica zoals meprobamaat, hypnotica, sedatieve antidepressiva (bv. amitriptyline, doxepine, mianserine), sedatieve antihistaminica en neuroleptica zoals droperidol.

Naltrexon verhoogt de plasmaspiegel van acamprosaat.

Proefpersoneninformatie

## Bijlage D: Informatie over de verzekering

Voor iedereen die meedoet aan dit onderzoek, heeft de verrichter een verzekering afgesloten. De verzekering dekt schade door deelname aan het onderzoek. Dit geldt voor schade tijdens het onderzoek of binnen vier jaar na het einde van uw deelname aan het onderzoek. Schade moet u binnen die vier jaar aan de verzekeraar hebben gemeld.

De verzekering dekt niet alle schade. Onderaan deze tekst staat in het kort welke schade niet wordt gedekt.

Deze bepalingen staan in het Besluit verplichte verzekering bij medisch-wetenschappelijk onderzoek met mensen. Dit besluit staat op [www.ccmo.nl](http://www.ccmo.nl), de website van de Centrale Commissie Mensgebonden Onderzoek (zie 'Bibliotheek' en dan 'Wet- en regelgeving').

Bij schade kunt u direct contact leggen met de verzekeraar.

De verzekeraar van het onderzoek is:

Naam: CNA Insurance Company Limited

Adres: Polarisavenue 140, 2134 JX Hoofddorp

Telefoonnummer: +31(0)23-3036004, +31(0)638059413 ...

E-mail: [claimsnetherlands@cna Hardy.com](mailto:claimsnetherlands@cna Hardy.com) ...

De verzekering biedt een dekking van maximaal € 650.000 per proefpersoon en € 5.000.000 voor het hele onderzoek € 7.500.000 per jaar voor alle onderzoeken van dezelfde opdrachtgever.

De verzekering dekt de volgende schade **niet**:

- schade door een risico waarover u in de schriftelijke informatie bent ingelicht. Dit geldt niet als het risico zich ernstiger voordoet dan was voorzien of als het risico heel onwaarschijnlijk was;
- schade aan uw gezondheid die ook zou zijn ontstaan als u niet aan het onderzoek had meegedaan;
- schade door het niet (volledig) opvolgen van aanwijzingen of instructies;
- schade aan uw nakomelingen, als gevolg van een negatief effect van het onderzoek op u of uw nakomelingen;
- schade door een bestaande behandelmethode bij onderzoek naar bestaande behandelmethoden.

Proefpersoneninformatie

## Bijlage E: Toestemmingsformulier proefpersoon

### Lage dosering Naltrexon voor het in remissie brengen van de ziekte van Crohn

- Ik heb de informatiebrief gelezen. Ook kon ik vragen stellen. Mijn vragen zijn voldoende beantwoord. Ik had genoeg tijd om te beslissen of ik meedoe.
- Ik weet dat meedoen vrijwillig is. Ook weet ik dat ik op ieder moment kan beslissen om toch niet mee te doen of te stoppen met het onderzoek. Daarvoor hoef ik geen reden te geven.
- Ik geef toestemming voor het informeren van mijn huisarts/behandelend specialist/apotheker op de hoogte wordt/worden gebracht dat ik meedoe aan dit onderzoek.
- Ik geef toestemming voor het verzamelen en gebruiken van mijn medische gegevens, bloedmonsters en lichaamsmateriaal voor de beantwoording van de onderzoeksvraag in dit onderzoek.
- Ik weet dat voor de controle van het onderzoek sommige mensen toegang tot al mijn gegevens kunnen krijgen. Die mensen staan vermeld in deze informatiebrief. Ik geef toestemming voor die inzage door deze personen.
- Ik geef toestemming voor het informeren van mijn huisarts en/of behandelend specialist van onverwachte bevindingen die van belang (kunnen) zijn voor mijn gezondheid.
- Ik weet dat ik niet zwanger mag worden tijdens het onderzoek
- Ik geef toestemming voor het verstrekken van mijn naam en adresgegevens middels een recept aan de apotheek van het Erasmus MC.
- Ik geef  **wel**  
 **geen**  
toestemming om mijn lichaamsmateriaal en persoonsgegevens na dit onderzoek te bewaren en om dit later nog voor toekomstig onderzoek te gebruiken, zoals in de informatiebrief staat.
- Ik wil meedoen aan dit onderzoek.

-----  
Naam proefpersoon:

Handtekening:

Datum: \_\_ / \_\_ / \_\_

-----  
Ik verklaar dat ik deze proefpersoon volledig heb geïnformeerd over het genoemde onderzoek. Als er tijdens het onderzoek informatie bekend wordt die de toestemming van de proefpersoon zou kunnen beïnvloeden, dan breng ik hem/haar daarvan tijdig op de hoogte.

Naam onderzoeker (of diens vertegenwoordiger):

Handtekening:

Datum: \_\_ / \_\_ / \_\_
